# Supplementary material for: Measures of empathy and compassion: A scoping review
Source: PubMed Central journal article supplement (PMC10798632; doi:10.1371/journal.pone.0297099), 2024-01-19
Supplement: pone.0297099.s001.pdf [file pone.0297099.s001.pdf]

| Instrument                                                                                             | Reference                    | Study Type               | Study Population                                                                                                                                                                                                                                                 | Age (range [R] and/or Mean [M] with Standard Deviation [SD]) | Gender                                                                                                                                           | Internal Consistency | Test Re-Test Reliability | Interrater Reliability | Content Validity | Construct Validity | Discriminant/Divergent Validity | Convergent Validity | Predictive Validity | Factor Analysis/Principal Component | Confirmatory Factor Analysis | Structural Equation Modeling | Control/Correlation with Social Desirability | Other Advanced Statistics | Other Biased Responding or Lie Scale | Total Psychometric Assessments |
|--------------------------------------------------------------------------------------------------------|------------------------------|--------------------------|------------------------------------------------------------------------------------------------------------------------------------------------------------------------------------------------------------------------------------------------------------------|--------------------------------------------------------------|--------------------------------------------------------------------------------------------------------------------------------------------------|----------------------|--------------------------|------------------------|------------------|--------------------|---------------------------------|---------------------|---------------------|-------------------------------------|------------------------------|------------------------------|----------------------------------------------|---------------------------|--------------------------------------|--------------------------------|
| <b>Behavioural/Expert Coder</b>                                                                        |                              |                          |                                                                                                                                                                                                                                                                  |                                                              |                                                                                                                                                  |                      |                          |                        |                  |                    |                                 |                     |                     |                                     |                              |                              |                                              |                           |                                      |                                |
| Affective Sensitivity Scale [Unnamed]                                                                  | Campbell et al. (1971)       | Behavioural/Expert Coder | 240 Master's-level counseling/guidance students                                                                                                                                                                                                                  | N/A                                                          | N/A                                                                                                                                              | X                    | X                        |                        | X                | X                  |                                 | X                   | X                   |                                     |                              |                              |                                              |                           |                                      | 6                              |
| Analog Task of Prosocial Helping (AToP-H)                                                              | Greenslade & Coggins (2022)  | Behavioural/Expert Coder | 20 children with autism spectrum disorder (ASD) and 20 with typical development                                                                                                                                                                                  | with ASD: 49-79 months; TD: 37-77 months                     | 28 male, 12 female                                                                                                                               | X                    |                          | X                      | X                | X                  | X                               |                     |                     |                                     |                              |                              |                                              |                           |                                      | 6                              |
| Assessment of Motivational Interviewing Groups – Observer Scales (AMIGOS)                              | Wagner & Ingersoll (2017)    | Behavioural/Expert Coder | Adults in 18 group therapy sessions rated by experts (total number not reported)                                                                                                                                                                                 |                                                              | N/A                                                                                                                                              | X                    |                          | X                      |                  |                    |                                 | X                   |                     |                                     |                              |                              |                                              |                           |                                      | 3                              |
| Barrett-Lennard Relationship Inventory Observer Form (BLRI Obs-40)                                     | Bhatti et al. (2023)         | Behavioural/Expert Coder | 19 counselors and 69 young people (BLRI Obs-40)                                                                                                                                                                                                                  | counselor: M=45, SD=13.7; young people: M=13.7, SD=8         | counselors: 16% male, 84% female; young people: 30.4% male, 66.7% female                                                                         | X                    | X                        | X                      | X                | X                  |                                 | X                   |                     | X                                   | X                            | X                            |                                              |                           |                                      | 8                              |
| Behavioral Assessment of Empathy                                                                       | Stover et al. (1971)         | Behavioural/Expert Coder | 51 mother-child play sessions rated by researchers                                                                                                                                                                                                               | Children: R: 4-10                                            | Female (100%) Male (0%)                                                                                                                          |                      |                          | X                      |                  | X                  |                                 | X                   |                     |                                     |                              |                              |                                              |                           |                                      | 3                              |
| Callous-Unemotional Problems and Impairment (CUPI)                                                     | Castagna & Waschbusch (2021) | Behavioural/Expert Coder | 265 children ages 4 to 14 years old                                                                                                                                                                                                                              | M=8.04, SD=2.07 (range 4-14)                                 | 67.9% boys                                                                                                                                       | X                    |                          |                        |                  | X                  | X                               | X                   |                     | X                                   |                              |                              |                                              |                           |                                      | 5                              |
| Collaborative Behaviors Observational Assessment Tool (CBOAT)                                          | Cayir et al. (2020)          | Behavioural/Expert Coder | 33 interprofessional health care providers                                                                                                                                                                                                                       |                                                              |                                                                                                                                                  |                      |                          | X                      | X                |                    |                                 |                     |                     |                                     |                              |                              |                                              |                           |                                      | 2                              |
| Contingency Management Competence Scale (CMCS)                                                         | Petry et al. (2010)          | Behavioural/Expert Coder | 35 substance abuse clinicians, 181 patients receiving substance abuse treatment (N=163)                                                                                                                                                                          |                                                              | Female (48.2%) Male (51.8%)                                                                                                                      | X                    |                          | X                      | X                | X                  | X                               | X                   | X                   | X                                   |                              |                              |                                              |                           |                                      | 8                              |
| Edinburgh Social Cognition Test (ESCoT)                                                                | Baksh et al. (2021)          | Behavioural/Expert Coder | 19 adults with a diagnosis of Asperger's Syndrome (AS) or High-Functioning Autism (HFA) according to established DSM-IV criteria                                                                                                                                 | M = 38.47, SD = 15.63                                        | 12 males, 7 females                                                                                                                              | X                    |                          | X                      | X                | X                  | X                               | X                   | X                   |                                     |                              |                              |                                              |                           |                                      | 7                              |
| Empathic Understanding Assessment (EUA)                                                                | Coyne et al. (2007)          | Behavioural/Expert Coder | 128 mother-child dyads (N=256)                                                                                                                                                                                                                                   |                                                              | Female (77%) Male (23%)                                                                                                                          |                      |                          | X                      |                  |                    |                                 |                     |                     |                                     |                              |                              |                                              |                           |                                      | 1                              |
| Empathic Counselor Response Scale (ECRS)                                                               | Bayne & Hankey (2020)        | Behavioural/Expert Coder | 290 counselors                                                                                                                                                                                                                                                   | R: 17-74                                                     | 84.9% female, 14.8% male                                                                                                                         | X                    |                          | X                      | X                | X                  | X                               | X                   |                     | X                                   | X                            |                              |                                              |                           |                                      | 8                              |
| Empathic Understanding Rating Scale                                                                    | Avery & Danish (1976)        | Behavioural/Expert Coder | 150 therapist-client interactions rated by trained individuals                                                                                                                                                                                                   |                                                              | N/A                                                                                                                                              |                      |                          | X                      |                  |                    |                                 |                     |                     |                                     |                              |                              |                                              |                           |                                      | 1                              |
| Empathy and Clarity Rating Scale (ECRS)                                                                | Terregino et al. (2019)      | Behavioural/Expert Coder | 65 medical students                                                                                                                                                                                                                                              |                                                              | N/A                                                                                                                                              |                      |                          | X                      | X                |                    |                                 |                     |                     |                                     |                              |                              |                                              |                           |                                      | 2                              |
| Empathy Clinical Evaluation Exercise (ECEX)                                                            | Stackhouse et al. (2020)     | Behavioural/Expert Coder | 11 veterinary students rated by independent evaluators                                                                                                                                                                                                           |                                                              | N/A                                                                                                                                              |                      |                          | X                      |                  | X                  |                                 |                     |                     |                                     |                              |                              |                                              |                           |                                      | 2                              |
| Essential Properties of Yoga Questionnaire (EPYQ)                                                      | Park et al. (2018)           | Behavioural/Expert Coder | 481 yoga students, instructors, and researchers (Sample 1a), 329 active-duty military and veterans (Sample 1b), 401 yoga instructors (Sample 2), 144 yoga students, instructors, researchers and active-duty military and veterans (Sample 3, Phase IV) (N=1445) |                                                              | Sample 1a: Female (90%) Male (10%)<br>Sample 1b: Female (50%) Male (50%)<br>Sample 2: Female (92%) Male (8%)<br>Phase 4: Female (79%) Male (21%) | X                    | X                        | X                      | X                | X                  | X                               | X                   | X                   | X                                   | X                            |                              |                                              |                           |                                      | 9                              |
| Four Habits Coding Scheme (4HCS)                                                                       | Krupat et al. (2006)         | Behavioural/Expert Coder | 50 physicians                                                                                                                                                                                                                                                    |                                                              | Female (50%) Male (50%)                                                                                                                          | X                    |                          | X                      | X                | X                  | X                               | X                   |                     |                                     |                              |                              |                                              |                           |                                      | 4                              |
| Global Interprofessional Therapeutic Communication Scale© (GITCSC)                                     | Campbell et al. (2022)       | Behavioural/Expert Coder | 420 nursing students                                                                                                                                                                                                                                             |                                                              |                                                                                                                                                  | X                    |                          | X                      | X                | X                  |                                 |                     |                     | X                                   | X                            |                              |                                              | X                         |                                      | 7                              |
|                                                                                                        | Campbell & Aredes (2019)     | Behavioural/Expert Coder | 502 unique crowd source viewers                                                                                                                                                                                                                                  |                                                              | N/A                                                                                                                                              | X                    |                          | X                      | X                | X                  |                                 |                     |                     | X                                   | X                            |                              |                                              | X                         |                                      | 3                              |
| Health Coaching Index (HCI)                                                                            | Sohl et al. (2021)           | Behavioural/Expert Coder | 42 trainees who completed a National Board for Health and Wellness Coaching-approved training program and coached a standardized patient                                                                                                                         | not indicated                                                | 41 female                                                                                                                                        |                      |                          | X                      | X                | X                  |                                 | X                   |                     |                                     |                              |                              |                                              |                           |                                      | 4                              |
| Helpful Responses Questionnaire (HRQ)                                                                  | Miller et al. (1991)         | Behavioural/Expert Coder | 190 adults                                                                                                                                                                                                                                                       |                                                              | Female (80.5%) Male (19.5%)                                                                                                                      |                      |                          | X                      |                  |                    |                                 |                     |                     |                                     |                              |                              |                                              |                           |                                      | 1                              |
| Helpful Responses to Refugees Questionnaire (HRRQ)                                                     | Potocky & L Guskovict (2016) | Behavioural/Expert Coder | 90 service providers working with refugees                                                                                                                                                                                                                       |                                                              | N/A                                                                                                                                              | X                    | X                        | X                      | X                | X                  | X                               | X                   |                     |                                     |                              |                              |                                              |                           |                                      | 6                              |
| Jefferson Scale for Physician Empathy for Observers (JSEO)                                             | Mallory et al. (2021)        | Behavioural/Expert Coder | 4 raters, 24 videos of 12 interns                                                                                                                                                                                                                                | not indicated                                                | not indicated                                                                                                                                    | X                    | X                        | X                      | X                | X                  |                                 | X                   |                     |                                     |                              |                              |                                              |                           |                                      | 5                              |
| Kids' Empathic Development Scale (KEDS)                                                                | Reid et al. (2013)           | Behavioural/Expert Coder | 220 children                                                                                                                                                                                                                                                     |                                                              | Female (48%) Male (52%)                                                                                                                          | X                    |                          |                        | X                | X                  | X                               |                     |                     | X                                   |                              |                              |                                              |                           |                                      | 5                              |
| Measure of Expressed Empathy                                                                           | Malin & Pos (2015)           | Behavioural/Expert Coder | 30 patients with depression and their therapists (n=16)                                                                                                                                                                                                          | R: 18-65                                                     | Female (73.9%) Male (26.1%)                                                                                                                      | X                    | X                        | X                      | X                | X                  | X                               | X                   | X                   | X                                   | X                            | X                            |                                              |                           | X                                    | 8                              |
| Multiple Mini-Interview (MMI)                                                                          |                              |                          | 225 students who were offered and accepted a place on one of the nursing or midwifery programmes                                                                                                                                                                 | 18-35                                                        | Female (63.5%) Male (36.5%)                                                                                                                      | X                    |                          | X                      | X                | X                  |                                 | X                   | X                   |                                     |                              |                              |                                              |                           |                                      | 4                              |
|                                                                                                        | Callwood et al. (2020)       | Behavioural/Expert Coder | 253 pharmacy school candidates                                                                                                                                                                                                                                   | M = 22.17, SD = 3.41                                         | Female (63.5%) Male (36.5%)                                                                                                                      |                      |                          | X                      | X                | X                  |                                 |                     |                     |                                     |                              |                              |                                              |                           |                                      | 1                              |
|                                                                                                        | Cox et al. (2015)            | Behavioural/Expert Coder | 62 midwife students                                                                                                                                                                                                                                              |                                                              | N/A                                                                                                                                              | X                    |                          | X                      | X                | X                  |                                 |                     |                     |                                     |                              |                              |                                              |                           |                                      | 3                              |
|                                                                                                        | Callwood et al. (2014)       | Behavioural/Expert Coder | 444 medical students                                                                                                                                                                                                                                             |                                                              | N/A                                                                                                                                              | X                    |                          | X                      |                  |                    |                                 |                     |                     |                                     |                              |                              |                                              |                           | X                                    | 3                              |
|                                                                                                        | Sebok et al. (2014)          | Behavioural/Expert Coder | 110 veterinary medicine applicants                                                                                                                                                                                                                               |                                                              | Female (79.1%) Male (20.9%)                                                                                                                      | X                    |                          | X                      | X                | X                  | X                               |                     |                     | X                                   |                              |                              |                                              |                           |                                      | 6                              |
| Parent Affective and Cognitive Empathy Scale (PACES)                                                   | Hecker et al. (2009)         | Behavioural/Expert Coder | 60 primary caregivers and their children (N=120)                                                                                                                                                                                                                 | R: 7-57, M = 23.35, SD = 4.05                                | Female (90%) Male (10%)                                                                                                                          |                      |                          | X                      | X                | X                  | X                               | X                   |                     |                                     |                              |                              |                                              | X                         |                                      | 6                              |
| Performance of Empathic Expression Rating Scale (PEERS)                                                | Stern et al. (2015)          | Behavioural/Expert Coder | 60 individuals diagnosed with schizophrenia, 51 healthy adult controls (N=111)                                                                                                                                                                                   |                                                              | N/A                                                                                                                                              | X                    |                          | X                      | X                | X                  | X                               | X                   |                     |                                     |                              |                              |                                              |                           |                                      | 5                              |
| Physician-Caregiver Relationship Scales (PCRS)                                                         | Cox et al. (2008)            | Behavioural/Expert Coder | 95 physician-parent dyads (family medicine or pediatrician physicians and parents of a child patients) (N=192)                                                                                                                                                   |                                                              | N/A                                                                                                                                              | X                    |                          | X                      | X                | X                  | X                               | X                   |                     |                                     |                              |                              |                                              |                           |                                      | 8                              |
| Quality of Interactions Schedule (QuIS)                                                                | Young et al. (2022)          | Behavioural/Expert Coder | 107 patients                                                                                                                                                                                                                                                     | not indicated                                                | not indicated                                                                                                                                    |                      |                          | X                      | X                | X                  |                                 |                     | X                   |                                     |                              |                              |                                              |                           |                                      | 1                              |
| Screening, Brief Intervention and Referral to Treatment Checklist for Observation in Real-time (SCORE) | Young et al. (2022)          | Behavioural/Expert Coder | 75 providers in emergency departments, hospital outpatient/ambulatory clinics, and hospital inpatient settings rated by trained individuals                                                                                                                      |                                                              | N/A                                                                                                                                              |                      |                          | X                      | X                | X                  |                                 |                     |                     |                                     |                              |                              |                                              |                           |                                      | 1                              |
| Social Cognition and Functioning (SCAF)                                                                | Vendetti et al. (2017)       | Behavioural/Expert Coder | 173 patients with schizophrenia                                                                                                                                                                                                                                  |                                                              | N/A                                                                                                                                              |                      | X                        | X                      |                  |                    | X                               |                     | X                   |                                     |                              |                              |                                              |                           |                                      | 5                              |
| Staff-Patient Interaction Response Scale for Palliative Care Nursing (SPIRS-PCN)                       | Ottert et al. (2013)         | Behavioural/Expert Coder | 181 nurses                                                                                                                                                                                                                                                       |                                                              | N/A                                                                                                                                              | X                    | X                        | X                      |                  |                    |                                 |                     |                     |                                     |                              |                              |                                              |                           | X                                    | 3                              |
| Tape Expert Response Procedure (TERPs)                                                                 | Yates et al. (1998)          | Behavioural/Expert Coder | 56 undergraduate counseling students                                                                                                                                                                                                                             | mean = 28.4                                                  | Female (64.3%) Male (35.7%)                                                                                                                      | X                    | X                        | X                      | X                | X                  |                                 |                     |                     |                                     |                              |                              |                                              |                           |                                      | 3                              |
| Taxonomy of Compassionate Physician Behaviours [Unnamed]                                               | Walston & Weitz (1975)       | Behavioural/Expert Coder | 49 interactions between oncologists (n=23) and patients with advanced cancer                                                                                                                                                                                     | 16+                                                          | Female (52.6%) Male (47.4%)                                                                                                                      |                      |                          | X                      |                  |                    |                                 |                     |                     |                                     |                              |                              |                                              |                           |                                      | 1                              |
| Therapist Empathy Scale (TES)                                                                          | Cameron et al. (2015)        | Behavioural/Expert Coder | 91 therapists                                                                                                                                                                                                                                                    |                                                              | Female (65%) Male (45%)                                                                                                                          | X                    |                          | X                      | X                | X                  | X                               | X                   |                     | X                                   |                              |                              |                                              |                           |                                      | 7                              |
| Therapists' Systemic Response Rating Scale [Unnamed]                                                   | Decker et al. (2014)         | Behavioural/Expert Coder | 15 clients in therapy for marital distress                                                                                                                                                                                                                       |                                                              | N/A                                                                                                                                              |                      |                          | X                      | X                | X                  |                                 |                     | X                   |                                     |                              |                              |                                              |                           |                                      | 3                              |
| Truax Accurate Empathy Scale (AE)                                                                      | Kung (2000)                  | Behavioural/Expert Coder | 30 clients of therapists (n=12) rated by trained undergraduate students                                                                                                                                                                                          |                                                              | Female (64.3%) Male (35.7%)                                                                                                                      |                      |                          | X                      | X                | X                  |                                 |                     |                     | X                                   |                              |                              |                                              |                           |                                      | 2                              |
| Warmth/Affection Coding System (WACS)                                                                  | Wenegrat (1974)              | Behavioural/Expert Coder | 2 expert coders                                                                                                                                                                                                                                                  | not indicated                                                | N/A                                                                                                                                              | X                    |                          | X                      |                  | X                  |                                 | X                   |                     |                                     |                              |                              |                                              |                           |                                      | 4                              |
| <b>Peer/Corollary Report</b>                                                                           |                              |                          |                                                                                                                                                                                                                                                                  |                                                              |                                                                                                                                                  |                      |                          |                        |                  |                    |                                 |                     |                     |                                     |                              |                              |                                              |                           |                                      |                                |
| 5-item Compassion Measure                                                                              | Prasad et al. (2023)         | Peer/Corollary Report    | 866 emergency department patients                                                                                                                                                                                                                                | not indicated                                                | N/A                                                                                                                                              | X                    |                          | X                      |                  |                    |                                 | X                   |                     |                                     | X                            |                              |                                              |                           |                                      | 0                              |
| 24-Item Rating Form of Clinical Competence [Unnamed]                                                   | Sabapathi et al. (2019)      | Peer/Corollary Report    | 450 emergency department patients                                                                                                                                                                                                                                | R: 18-93                                                     | Female (55%) Male (45%)                                                                                                                          | X                    |                          |                        |                  |                    |                                 | X                   |                     |                                     | X                            |                              |                                              |                           |                                      | 3                              |
| Adapted Health Communication Assessment Tool© (adapted HCATS)                                          | Hojat et al. (2007)          | Peer/Corollary Report    | 4560 medical college graduates                                                                                                                                                                                                                                   |                                                              | Female (28%) Male (72%)                                                                                                                          | X                    |                          |                        |                  |                    |                                 | X                   |                     | X                                   |                              |                              |                                              |                           |                                      | 5                              |
| Adapted SERVQUAL                                                                                       | Baird et al. (2021)          | Peer/Corollary Report    | 48 senior nursing students                                                                                                                                                                                                                                       | N/A                                                          | N/A                                                                                                                                              | X                    |                          | X                      | X                | X                  |                                 |                     |                     | X                                   |                              |                              |                                              |                           |                                      | 3                              |
| Altruism Scale                                                                                         | Aslamah et al. (2021)        | Peer/Corollary Report    | 520 patients                                                                                                                                                                                                                                                     |                                                              | Female (46%) Male (53%)                                                                                                                          | X                    |                          | X                      | X                | X                  | X                               | X                   |                     | X                                   | X                            |                              |                                              |                           |                                      | 7                              |
|                                                                                                        | Friedman et al. (2015)       | Peer/Corollary Report    | 300 people who inject drugs                                                                                                                                                                                                                                      |                                                              | N/A                                                                                                                                              | X                    |                          | X                      | X                | X                  |                                 | X                   |                     |                                     |                              |                              |                                              |                           |                                      | 3                              |
| ASPIRE Coaching Fidelity Checklist (ACFC)                                                              | Damschroder et al. (2016)    | Peer/Corollary Report    | 481 patients from Veterans Affairs medical centers enrolled in a weight management intervention trial                                                                                                                                                            |                                                              | N/A                                                                                                                                              | X                    |                          | X                      |                  | X                  |                                 |                     | X                   | X                                   |                              |                              |                                              | X                         |                                      | 5                              |



| Instrument                                                                                          | Reference                      | Study Type            | Study Population                                                                                                                                                               | Age (range [R] and/or Mean [M] with Standard Deviation [SD])                       | Gender                                                                                                                 | Internal Consistency | Test Re-Test Reliability | Interrater Reliability | Content Validity | Construct Validity | Discriminant/Divergent Validity | Convergent Validity | Predictive Validity | Factor Analysis/Principal Component | Confirmatory Factor Analysis | Structural Equation Modeling | Control/Correlation with Social Desirability | Other Advanced Statistics | Other Biased Responding or Lie Scale | Total Psychometric Assessments |
|-----------------------------------------------------------------------------------------------------|--------------------------------|-----------------------|--------------------------------------------------------------------------------------------------------------------------------------------------------------------------------|------------------------------------------------------------------------------------|------------------------------------------------------------------------------------------------------------------------|----------------------|--------------------------|------------------------|------------------|--------------------|---------------------------------|---------------------|---------------------|-------------------------------------|------------------------------|------------------------------|----------------------------------------------|---------------------------|--------------------------------------|--------------------------------|
| Visual CARE Measure 10Q                                                                             | Place et al. (2016)            | Peer/Corollary Report | 149 children, 220 parents (N=369)                                                                                                                                              |                                                                                    | Children: Female (35%) Male (65%)<br>Parents: Female (59%) Male (41%)                                                  | X                    |                          |                        | X                |                    |                                 |                     |                     |                                     |                              |                              |                                              |                           |                                      | 2                              |
| Visual CARE Measure 10Q Parent                                                                      | Place et al. (2016)            | Peer/Corollary Report | 149 children, 220 parents (N=369)                                                                                                                                              |                                                                                    | Children: Female (35%) Male (65%)<br>Parents: Female (59%) Male (41%)                                                  | X                    |                          |                        | X                |                    |                                 |                     |                     |                                     |                              |                              |                                              |                           |                                      | 2                              |
| <b>Self-Report</b>                                                                                  |                                |                       |                                                                                                                                                                                |                                                                                    |                                                                                                                        |                      |                          |                        |                  |                    |                                 |                     |                     |                                     |                              |                              |                                              |                           |                                      |                                |
| 1-Item Brief Burnout Screening [Unnamed]                                                            | Kemper et al. (2019)           | Self-Report           | 3906 pediatric residents                                                                                                                                                       |                                                                                    | Female (72%) Male (28%)                                                                                                |                      |                          |                        |                  | X                  |                                 |                     |                     |                                     |                              |                              |                                              |                           |                                      | 1                              |
| 2-Item Brief Burnout Screening [Unnamed]                                                            | Kemper et al. (2019)           | Self-Report           | 3906 pediatric residents                                                                                                                                                       |                                                                                    | Female (72%) Male (28%)                                                                                                |                      |                          |                        |                  | X                  |                                 |                     |                     |                                     |                              |                              |                                              |                           |                                      | 1                              |
| 6-Item brief short form Coping with Children's Negative Emotions Scale (CCNES)                      | King et al. (2022)             | Self-Report           | 938 parents                                                                                                                                                                    | M=37.37, SD=6.9                                                                    | 556 female, 341 male, 2 non-binary/transgender                                                                         | X                    | X                        |                        | X                | X                  |                                 |                     |                     | X                                   | X                            | X                            |                                              | X                         |                                      | 9                              |
| 16-Item Remembered Relationship with Parents (RRP10) Scale                                          | Denollet et al. (2007)         | Self-Report           | 664 adults                                                                                                                                                                     |                                                                                    | Female (52%) Male (48%)                                                                                                | X                    |                          |                        |                  |                    |                                 | X                   |                     | X                                   |                              |                              |                                              |                           |                                      | 3                              |
| 15-Item Mutualism Scale                                                                             | Lin & Bales (2022)             | Self-Report           | 902 participants (study 1: 400; study 2: 502)                                                                                                                                  | study 1: M=40, SD=12.54; study 2: M=36, SD=12.12                                   | study 1: 252 females, study 2: 381 females                                                                             | X                    | X                        |                        |                  | X                  | X                               |                     | X                   | X                                   | X                            | X                            |                                              |                           |                                      | 8                              |
| 18-Item short form Coping with Children's Negative Emotions Scale (CCNES)                           | King et al. (2022)             | Self-Report           | 937 parents                                                                                                                                                                    | M=37.37, SD=6.8                                                                    | 556 female, 341 male, 2 non-binary/transgender                                                                         | X                    | X                        |                        | X                | X                  |                                 |                     | X                   | X                                   | X                            | X                            |                                              | X                         |                                      | 9                              |
| 20-Item Toronto Alexithymia Scale (TAS-20)                                                          | Carnovale et al. (2021)        | Self-Report           | 1930 adults                                                                                                                                                                    | M= 35.46, SD 12.55 (range 18-81)                                                   | 1063 women, 865 men                                                                                                    | X                    |                          |                        | X                | X                  | X                               |                     |                     | X                                   | X                            |                              |                                              |                           |                                      | 7                              |
| 30-Item Rating Scale of Parent Satisfaction with Pediatric Neuropsychological Evaluations [Unnamed] | Bodin et al. (2007)            | Self-Report           | 117 parents/guardians of children at a children's hospital                                                                                                                     |                                                                                    | Patients: Female (45%) Male (55%)                                                                                      | X                    |                          |                        | X                | X                  | X                               |                     |                     | X                                   |                              |                              |                                              |                           |                                      | 6                              |
| Accountability Scale                                                                                | Witvliet et al. (2022)         | Self-Report           | 1257 participants (study 1: 484 adults, study 2: 773 adults, study 3: 234 adults)                                                                                              | study 1: M=46.66, SD=17.23; study 2: M=44.42, SD=16.52; study 3: M=46.43, SD=16.32 | study 1: 241 female, 242 male, 1 other; study 2: 389 female, 376 male, 5 other; study 3: 131 female, 101 male, 2 other | X                    | X                        |                        | X                | X                  | X                               |                     |                     | X                                   | X                            |                              |                                              |                           |                                      | 8                              |
| Actions and Feelings Questionnaire (AFQ)                                                            | Williams et al. (2018b)        | Self-Report           | 278 adults (Study 1), 20 right-handed adults (Study 2) (N=298)                                                                                                                 |                                                                                    | Study 1: Females (68%) Males (32%)<br>Study 2: Females (50%) Males (50%)                                               | X                    | X                        |                        |                  |                    |                                 | X                   |                     | X                                   |                              | X                            |                                              | X                         |                                      | 4                              |
| Active Empathic Listening (AEL) Scale                                                               | Gearhart et al. (2011)         | Self-Report           | 345 undergraduate students                                                                                                                                                     |                                                                                    | Female (55%) Male (45%)                                                                                                | X                    |                          |                        |                  | X                  | X                               |                     |                     | X                                   |                              | X                            |                                              | X                         |                                      | 5                              |
| Ad Response Empathy (ARE)                                                                           | Drollinger et al. (2006)       | Self-Report           | 151 salespeople                                                                                                                                                                |                                                                                    | Female (23%) Male (77%)                                                                                                | X                    |                          |                        |                  | X                  | X                               |                     |                     | X                                   | X                            | X                            |                                              | X                         |                                      | 6                              |
| Ad Response Sympathy (ARS)                                                                          | Escalas & Stern (2003)         | Self-Report           | 22 undergraduate students                                                                                                                                                      | N/A                                                                                | N/A                                                                                                                    | X                    |                          |                        |                  | X                  |                                 |                     |                     | X                                   | X                            | X                            |                                              | X                         |                                      | 4                              |
| Adolescent and Adult Mindfulness Scale (AAMS)                                                       | Drouman et al. (2018)          | Self-Report           | 588 older adolescents                                                                                                                                                          | R: 18-25                                                                           | Female (79%) Male (21%)                                                                                                | X                    | X                        |                        |                  | X                  |                                 |                     | X                   | X                                   |                              |                              |                                              | X                         |                                      | 7                              |
| Adolescent Attitudes towards Dementia Scale (A-ADS)                                                 | Griffiths et al. (2018)        | Self-Report           | 262 high school students                                                                                                                                                       | R: 14-18                                                                           | Female (59%) Male (41%)                                                                                                | X                    |                          |                        | X                | X                  |                                 |                     |                     | X                                   |                              |                              |                                              |                           |                                      | 5                              |
| Adult-Adolescent Parenting Inventory (AAP)                                                          | Lutenbacher (2001)             | Self-Report           | 225 low-income single mothers                                                                                                                                                  |                                                                                    | Female (100%) Male (0%)                                                                                                | X                    |                          |                        |                  | X                  | X                               |                     |                     | X                                   |                              |                              |                                              | X                         |                                      | 6                              |
| Affective and Cognitive Measure of Empathy (ACME)                                                   | Murphy et al. (2020)           | Self-Report           |                                                                                                                                                                                |                                                                                    | Female (53%) Male (47%)                                                                                                |                      | X                        |                        |                  | X                  | X                               |                     | X                   |                                     |                              | X                            | X                                            |                           |                                      | 6                              |
|                                                                                                     | Vachon & Lynam (2016)          | Self-Report           | 1287 undergraduate psychology students                                                                                                                                         |                                                                                    | Female (48.5%) Male (51.5%)                                                                                            |                      | X                        |                        |                  | X                  | X                               |                     |                     |                                     |                              | X                            | X                                            |                           |                                      | 6                              |
| Affective Forecasting Situation Questionnaire                                                       | Qian et al. (2020)             | Self-Report           | 272 medical students                                                                                                                                                           |                                                                                    | Female (75.7%) Male (24.3%)                                                                                            | X                    |                          |                        | X                |                    |                                 | X                   |                     |                                     |                              |                              |                                              |                           |                                      | 3                              |
| AIDS Attitude Scale                                                                                 | Froman & Owen (1997)           | Self-Report           | 21 practicing nurses (Study 1), 64 practicing nurses (Study 2) (N=85)                                                                                                          | N/A                                                                                | N/A                                                                                                                    | X                    |                          |                        |                  | X                  | X                               |                     |                     |                                     |                              |                              |                                              |                           |                                      | 3                              |
| AIDS Attitude Scale- Generic (AAS-G)                                                                | Froman & Owen (2001)           | Self-Report           | 318 adults                                                                                                                                                                     |                                                                                    | Female (57%) Male (43%)                                                                                                | X                    | X                        |                        | X                | X                  |                                 |                     |                     | X                                   |                              |                              |                                              |                           |                                      | 5                              |
| Altruism Scale for Children (ASC)                                                                   | Swank et al. (2020)            | Self-Report           | 576 elementary to high school students                                                                                                                                         | R: 8-19, M = 11.52, SD = 2.58                                                      | Female (30%) Male (62%) Other (3%)                                                                                     | X                    | X                        |                        | X                | X                  |                                 |                     | X                   | X                                   | X                            |                              |                                              |                           |                                      | 6                              |
| Anasakti Scale [Unnamed]                                                                            | Singh & Raina (2015)           | Self-Report           | 366 undergraduate, graduate, and research students in India                                                                                                                    | M = 23.55                                                                          | Female 64.5%, Male 35.5%                                                                                               |                      |                          |                        |                  |                    | X                               |                     |                     | X                                   |                              |                              |                                              |                           |                                      | 2                              |
| Appreciative Joy Scale (AJS)                                                                        | Zeng et al. (2017)             | Self-Report           | 631 Chinese adults (Study 1), 281 Chinese adults (Study 2), 234 Chinese adults (Study 3), 255 American adults (Study 4), 301 Chinese undergraduate students (Study 5) (N=1762) |                                                                                    | Females (66.2%) Male (33.8%)                                                                                           | X                    | X                        |                        | X                | X                  |                                 |                     |                     |                                     | X                            |                              |                                              | X                         |                                      | 7                              |
| Arab Muslim Perceptions of Perinatal Loss Care (AMPPLC)                                             | Alaradi et al. (2022)          | Self-Report           | 79 Arab Muslim adults                                                                                                                                                          | M = 40.3 years, SD = 13.5                                                          | Male (54.4%), female (45.6%)                                                                                           | X                    |                          |                        |                  |                    |                                 |                     |                     |                                     | X                            |                              |                                              | X                         |                                      | 1                              |
| Archie Estimate of Selfobject Pursuits (AESOP)                                                      | Archie & Barnett (2017)        | Self-Report           | 738 undergraduate students                                                                                                                                                     |                                                                                    | Female (71%) Male (29%)                                                                                                | X                    |                          |                        | X                | X                  | X                               |                     |                     | X                                   | X                            |                              | X                                            | X                         |                                      | 9                              |
| ASP ["Expressions of Spirituality"] Questionnaire                                                   | Bössing et al. (2007)          | Self-Report           | 488 German hospital staff members                                                                                                                                              | M = 49.2, SD = 13.9                                                                | Female (63%) Male (37%)                                                                                                | X                    |                          |                        | X                | X                  |                                 |                     |                     | X                                   |                              |                              |                                              |                           |                                      | 4                              |
| Attitudes About Reality Scale (AAR)                                                                 | Evans (2000)                   | Self-Report           | 118 employees of a mental health agency                                                                                                                                        | R: 21-81                                                                           | Female (75.4%) Male (24.6%)                                                                                            |                      |                          |                        |                  | X                  |                                 |                     |                     |                                     |                              |                              |                                              |                           |                                      | 1                              |
| Attitudes Related to Trauma-Informed Care Scale (ARTIC)                                             | Baker et al. (2021)            | Self-Report           | 1395 human services/health providers                                                                                                                                           | R: 18-65+                                                                          | Female = 565 Male = 175 Other = 2 Transgender = 1                                                                      | X                    | X                        |                        | X                | X                  | X                               |                     | X                   | X                                   | X                            |                              |                                              |                           |                                      | 9                              |
| Attitudes toward Suicidal Patients                                                                  | Aiah et al. (2002)             | Self-Report           | 1010 medical staff members                                                                                                                                                     |                                                                                    | Female (71.8%) Male (28.2%)                                                                                            |                      |                          |                        |                  |                    |                                 |                     |                     |                                     | X                            | X                            |                                              |                           |                                      | 2                              |
| Attitudes Toward Women with HIV/AIDS Scale                                                          | O'Hea et al. (2001)            | Self-Report           | 225 undergraduate psychology students                                                                                                                                          |                                                                                    | Female (81%) Male (19%)                                                                                                | X                    |                          |                        |                  | X                  |                                 |                     |                     | X                                   |                              |                              |                                              |                           |                                      | 3                              |
| Attribution Questionnaire-Substance Use Disorder (AQ-SUD)                                           | Johnson-Kwochika et al. (2021) | Self-Report           | 304 participants                                                                                                                                                               | M=37.2, SD=10.97                                                                   | 61.5% male, 45.59% female, 50%                                                                                         | X                    |                          |                        | X                | X                  | X                               |                     |                     | X                                   | X                            |                              |                                              |                           |                                      | 6                              |
| Awareness, Knowledge, Skills - General (ASK-G)                                                      | Domenech et al. (2022)         | Self-Report           | Phase 1: 13 experts, Phase 2: 204 adults                                                                                                                                       | M=41.63, SD = 16.08                                                                | Female (71.6%) Male (28.4%)                                                                                            | X                    |                          |                        | X                | X                  | X                               |                     |                     | X                                   | X                            | X                            |                                              |                           |                                      | 8                              |
| Barrett-Lennard Relationship Inventory (BLRI)                                                       | Cramer (1986)                  | Self-Report           | 335 undergraduate and graduate students                                                                                                                                        |                                                                                    | Female (88%) Male (12%)                                                                                                |                      |                          |                        |                  |                    | X                               |                     |                     |                                     |                              |                              |                                              | X                         |                                      | 1                              |
| Barrett-Lennard Relationship Inventory - Empathy (BLRI-E)                                           | Layton & Wyllie (1990)         | Self-Report           | 1286 participants (658 native Chinese speakers, 330 native Spanish speakers, 298 native English speakers)                                                                      |                                                                                    | (English speaking sample) 87.6% female, 12.1% male                                                                     |                      |                          |                        |                  |                    | X                               |                     |                     | X                                   | X                            | X                            |                                              | X                         |                                      | 2                              |
| Barrett-Lennard Relationship Inventory for Receiver (BLRI-R: CS-64)                                 | Chen et al. (2022)             | Self-Report           | 75 physicians                                                                                                                                                                  | M=38, SD = 12.9                                                                    | N/A                                                                                                                    | X                    |                          |                        |                  | X                  | X                               |                     |                     | X                                   | X                            | X                            |                                              | X                         |                                      | 5                              |
| Barriers to Physician Compassion Questionnaire                                                      | Fernando & Considine (2014)    | Self-Report           | 75 physicians                                                                                                                                                                  |                                                                                    | N/A                                                                                                                    | X                    |                          |                        |                  | X                  | X                               |                     |                     | X                                   | X                            | X                            |                                              | X                         |                                      | 6                              |
| Basic Empathy Scale (BES)                                                                           | McLaren et al. (2019)          | Self-Report           | 555 adolescents                                                                                                                                                                |                                                                                    | Female (64.1%) Male (35.9%)                                                                                            |                      |                          |                        |                  | X                  |                                 |                     |                     | X                                   |                              |                              |                                              |                           |                                      | 2                              |
|                                                                                                     | Peretti et al. (2019)          | Self-Report           | 363 adolescents                                                                                                                                                                | M = 14.8                                                                           | Female (46.6%) Male (53.4%)                                                                                            | X                    |                          |                        |                  | X                  | X                               |                     |                     | X                                   | X                            |                              |                                              |                           |                                      | 3                              |
|                                                                                                     | Jolliffe & Farrington (2006)   | Self-Report           | study 1: 728 individuals, study 2: 27 female psychology students, 45 female psychology students                                                                                | study 1: M = 29.38, SD = 11.92; study 2: M=21.88; study 3: M=27.87, SD=13.44       | study 1: 127 males, 592 females; 3 other/neither not say; study 2: 27 females; study 3: 45 females                     | X                    | X                        | X                      | X                | X                  | X                               |                     |                     | X                                   | X                            | X                            |                                              | X                         | X                                    | 10                             |
| Body Compassion Questionnaire (BCQ)                                                                 | Beadle et al. (2021)           | Self-Report           |                                                                                                                                                                                |                                                                                    |                                                                                                                        | X                    | X                        | X                      | X                | X                  | X                               |                     |                     | X                                   | X                            | X                            |                                              | X                         | X                                    | 8                              |
| Body Compassion Scale (BCS)                                                                         |                                |                       |                                                                                                                                                                                |                                                                                    |                                                                                                                        | X                    |                          |                        | X                | X                  | X                               |                     |                     | X                                   | X                            | X                            |                                              | X                         | X                                    | 8                              |

| Instrument                                                                                    | Reference                   | Study Type  | Study Population                                                                                                                                                                                                                                                              | Age (range [R] and/or Mean [M] with Standard Deviation [SD])                                             | Gender                                                                                                                                                                                                                                                    | Internal Consistency | Test Re-Test Reliability | Interrater Reliability | Content Validity | Construct Validity | Discriminant/Divergent Validity | Convergent Validity | Predictive Validity | Factor Analysis/Principal Component | Confirmatory Factor Analysis | Structural Equation Modeling | Control/Correlation with Social Desirability | Other Advanced Statistics | Other Biased Responding or Lie Scale | Total Psychometric Assessments |   |
|-----------------------------------------------------------------------------------------------|-----------------------------|-------------|-------------------------------------------------------------------------------------------------------------------------------------------------------------------------------------------------------------------------------------------------------------------------------|----------------------------------------------------------------------------------------------------------|-----------------------------------------------------------------------------------------------------------------------------------------------------------------------------------------------------------------------------------------------------------|----------------------|--------------------------|------------------------|------------------|--------------------|---------------------------------|---------------------|---------------------|-------------------------------------|------------------------------|------------------------------|----------------------------------------------|---------------------------|--------------------------------------|--------------------------------|---|
|                                                                                               | Van Niekirk et al. (2023)   | Self-Report | 513 women                                                                                                                                                                                                                                                                     | M = 29.84, SD = 10.88<br>study 1: 20.49 mean age, SD=3.86 years<br>study 2: 24.26 mean age, SD=4.16years | 100% women                                                                                                                                                                                                                                                | X                    |                          |                        |                  | X                  |                                 | X                   |                     | X                                   | X                            |                              |                                              |                           |                                      | 5                              |   |
|                                                                                               | Altman et al. (2020)        | Self-Report | study 1: 662 undergraduates<br>study 2: 250 undergraduates<br>662 undergraduate students (Study 1), 256 undergraduate psychology students (Study 2) (N=918)                                                                                                                   |                                                                                                          | study 1: Female (70.8%)<br>study 2: Female (72.1%)                                                                                                                                                                                                        | X                    |                          |                        |                  |                    |                                 |                     |                     | X                                   | X                            |                              |                                              |                           |                                      | 3                              |   |
| Body Image–Acceptance and Action Questionnaire (BIAAQ)                                        | Altman et al. (2017)        | Self-Report | 538 adults (Sample 1), 762 adults (Sample 2) (N=1300)                                                                                                                                                                                                                         |                                                                                                          | Female (71.2%) Male (28.8%)<br>Female (65.7%) Male (44.3%)                                                                                                                                                                                                | X                    |                          |                        | X                | X                  |                                 | X                   |                     | X                                   | X                            |                              | X                                            | X                         |                                      | 8                              |   |
| Body-Image Contextualized Adaptation of the Self-Compassion Scale (BI-SCS)                    | Basariod et al. (2018)      | Self-Report | 467 students                                                                                                                                                                                                                                                                  | M = 20.4, SD = 4.86                                                                                      | 68% female, 31% male                                                                                                                                                                                                                                      | X                    |                          |                        | X                | X                  |                                 | X                   | X                   | X                                   | X                            |                              |                                              |                           |                                      | 3                              |   |
| Bolton Compassion Strengths Indicators (BCSIs)                                                | Ulrich-French & Cox (2022)  | Self-Report | 421 preregistration undergraduate nursing students                                                                                                                                                                                                                            | M = 29, SD = 1+8.3                                                                                       | 90.7% female                                                                                                                                                                                                                                              | X                    | X                        |                        | X                | X                  | X                               | X                   | X                   | X                                   | X                            |                              |                                              |                           |                                      | 9                              |   |
| Breaking Bad News (BBN) Assessment Tool [Unnamed]                                             | Durkin et al. (2020)        | Self-Report | 10 medical students                                                                                                                                                                                                                                                           |                                                                                                          | Female (0%) Male (100%)                                                                                                                                                                                                                                   | X                    |                          | X                      |                  |                    |                                 |                     |                     |                                     |                              |                              |                                              | X                         |                                      | 2                              |   |
| Brief Assessment of Social Skills - Dementia (BASS-D)                                         | Vermeylen et al. (2019)     | Self-Report | 26 diagnosed with dementia, 28 healthy older adults an (N=54)                                                                                                                                                                                                                 | M = 81.38, SD = 9.39                                                                                     | N/a                                                                                                                                                                                                                                                       | X                    |                          |                        | X                | X                  |                                 | X                   |                     |                                     |                              |                              |                                              |                           |                                      | 3                              |   |
| Brief Dimensional Apathy Scale (b-DAS)                                                        | Radakovic et al. (2020)     | Self-Report | 53 ALS patients, 53 caregivers/paternalatives (N=106)                                                                                                                                                                                                                         |                                                                                                          | N/a                                                                                                                                                                                                                                                       | X                    | X                        |                        |                  |                    | X                               | X                   |                     |                                     |                              |                              |                                              |                           |                                      | 4                              |   |
| Burnout Measure - Short Version                                                               | Ahmed et al. (2022)         | Self-Report | 375 physicians                                                                                                                                                                                                                                                                | 52.43 mean age                                                                                           | Female (42.4%)                                                                                                                                                                                                                                            |                      |                          |                        | X                | X                  |                                 |                     |                     | X                                   | X                            |                              |                                              |                           |                                      | 4                              |   |
| Burns-Specific Patient-Reported Experience Measure (PREM) [Unnamed]                           | Hodgkinson et al. (2019)    | Self-Report | 27 burn patients                                                                                                                                                                                                                                                              |                                                                                                          | N/a                                                                                                                                                                                                                                                       | X                    |                          |                        |                  |                    |                                 |                     |                     |                                     |                              |                              |                                              |                           |                                      | 1                              |   |
| Calm Compassionate Care Scale (CCCS)                                                          | Kemper et al. (2015)        | Self-Report | 213 healthcare professionals                                                                                                                                                                                                                                                  |                                                                                                          | Female (73%) Male (27%)                                                                                                                                                                                                                                   | X                    |                          |                        |                  |                    |                                 | X                   |                     |                                     |                              |                              |                                              |                           |                                      | 2                              |   |
| Care Receiver View of Caregiver Role Enactment Scale                                          | Tetz et al. (2006)          | Self-Report | 123 patient-caregiver dyads (N=246)                                                                                                                                                                                                                                           |                                                                                                          | Female (65%) Male (35%)                                                                                                                                                                                                                                   |                      |                          |                        | X                | X                  |                                 |                     |                     | X                                   |                              |                              |                                              |                           |                                      | 3                              |   |
| Caring Assessment for Care Givers                                                             | Steele-Moises et al. (2011) | Self-Report | 54 nurses                                                                                                                                                                                                                                                                     |                                                                                                          | N/a                                                                                                                                                                                                                                                       | X                    | X                        |                        | X                | X                  | X                               | X                   |                     | X                                   |                              |                              |                                              |                           |                                      | 7                              |   |
| Caring Assessment Tool (CAT)                                                                  | Duffy et al. (2007)         | Self-Report | 557 hospitalized adults                                                                                                                                                                                                                                                       |                                                                                                          | N/a                                                                                                                                                                                                                                                       | X                    |                          |                        | X                |                    |                                 |                     |                     |                                     |                              |                              |                                              |                           |                                      | 2                              |   |
| Caring Assessment Tool - Version V (CAT-V)                                                    | Sim et al. (2019)           | Self-Report | 476 nurses                                                                                                                                                                                                                                                                    |                                                                                                          | N/a                                                                                                                                                                                                                                                       | X                    |                          |                        | X                | X                  |                                 | X                   |                     | X                                   | X                            |                              |                                              |                           |                                      | 5                              |   |
| Caring Behavior Coding Scheme (CBCS)                                                          | Mårtensson et al. (2021)    | Self-Report | 19 undergraduate nursing students                                                                                                                                                                                                                                             | range: 21-31                                                                                             | 4 men, 15 women                                                                                                                                                                                                                                           | X                    |                          | X                      | X                |                    |                                 |                     |                     |                                     |                              |                              |                                              |                           |                                      | 3                              |   |
| Caring Behaviors Inventory (CBI)                                                              | Coulombe et al. (2002)      | Self-Report | 211 hospital patients discharged from a surgical unit<br>362 hospitalized patients (Study 1), 64 patients and 42 nurses (Test-Retest Study) (N=468)                                                                                                                           |                                                                                                          | Female (49.6%) Male (50.4%)<br>Female (60.6%) Male (39.4%)                                                                                                                                                                                                | X                    |                          |                        | X                | X                  |                                 | X                   |                     | X                                   |                              |                              |                                              | X                         |                                      | 3                              |   |
| Caring Behaviors Inventory - Short Form (CBI-24)                                              | Wu et al. (2006)            | Self-Report | 640 direct and non-direct care staff                                                                                                                                                                                                                                          |                                                                                                          | N/a                                                                                                                                                                                                                                                       | X                    | X                        |                        |                  |                    |                                 |                     |                     |                                     | X                            |                              |                                              |                           |                                      | 5                              |   |
| Caring Culture Survey                                                                         | Menak et al. (2019)         | Self-Report |                                                                                                                                                                                                                                                                               |                                                                                                          | N/a                                                                                                                                                                                                                                                       | X                    |                          |                        | X                | X                  |                                 |                     |                     | X                                   | X                            | X                            |                                              |                           |                                      | 2                              |   |
| Caring Dimensions Inventory (CDI)                                                             | Watson (2003)               | Self-Report | 38 nursing lecturers                                                                                                                                                                                                                                                          |                                                                                                          | N/a                                                                                                                                                                                                                                                       | X                    |                          | X                      | X                |                    |                                 |                     |                     | X                                   | X                            | X                            |                                              |                           |                                      | 7                              |   |
|                                                                                               | Lea et al. (1998)           | Self-Report | 1452 nurses and nursing students                                                                                                                                                                                                                                              |                                                                                                          | Female (86.4%) Male (13.6%)<br>Female (88.8%) Male (11.2%)                                                                                                                                                                                                |                      |                          |                        | X                | X                  |                                 |                     |                     | X                                   | X                            | X                            |                                              |                           |                                      | 1                              |   |
|                                                                                               | Watson & Lea (1997)         | Self-Report | 1430 nurses                                                                                                                                                                                                                                                                   |                                                                                                          | Female (86.4%) Male (13.6%)<br>Female (88.8%) Male (11.2%)                                                                                                                                                                                                | X                    |                          |                        | X                | X                  |                                 |                     |                     |                                     |                              |                              |                                              |                           |                                      | 3                              |   |
| Caring Dimensions Inventory - 35-Item Version (CDI-35)                                        | Watson et al. (2001)        | Self-Report | 168 Scottish nursing students                                                                                                                                                                                                                                                 |                                                                                                          | N/a                                                                                                                                                                                                                                                       | X                    |                          |                        |                  |                    |                                 |                     |                     | X                                   | X                            |                              |                                              |                           |                                      | 3                              |   |
| Caring Efficacy Scale (CES)                                                                   | Reid et al. (2015)          | Self-Report | 2000 nurses                                                                                                                                                                                                                                                                   |                                                                                                          | N/a                                                                                                                                                                                                                                                       | X                    |                          |                        | X                |                    |                                 |                     |                     | X                                   | X                            |                              |                                              |                           |                                      | 4                              |   |
| Caring for Bliss Scale                                                                        | Rudaz et al. (2020)         | Self-Report | 205 adults (Study 1), 692 adults (Study 2) (N=897)                                                                                                                                                                                                                            |                                                                                                          |                                                                                                                                                                                                                                                           | X                    | X                        |                        |                  |                    |                                 | X                   |                     |                                     | X                            |                              |                                              |                           |                                      | 4                              |   |
|                                                                                               | Hwang et al. (2017)         | Self-Report | 8 experts (Study 1a, content validity), 11 institution-dwelling older adults (Study 1b, item analysis), 300 institution-dwelling older adults (Study 1c, EFA), 216 institution-dwelling older adults (Study 1d, CFA), 216 institution-dwelling older adults (Study 2) (N=751) | R: 60-97                                                                                                 | 1. N/a<br>2. N/a<br>3. Female (60.3%) Male (39.7%)<br>4. Female (54.2%) Male (45.8%)                                                                                                                                                                      | X                    | X                        |                        | X                |                    |                                 | X                   |                     | X                                   | X                            |                              |                                              |                           |                                      | 6                              |   |
| Carkhuff Scale                                                                                | Layton & Wykle (1990)       | Self-Report |                                                                                                                                                                                                                                                                               |                                                                                                          | Female (88%) Male (12%)<br>Female (50.5%) Male (49.5%)                                                                                                                                                                                                    |                      |                          |                        | X                | X                  |                                 |                     |                     |                                     |                              |                              |                                              |                           |                                      | 1                              |   |
| Carolina Opinions on Care of Older Adults (COCOA)                                             | Hollar et al. (2011)        | Self-Report | 160 medical students                                                                                                                                                                                                                                                          | R: 21-34                                                                                                 | Female (50.5%) Male (49.5%)                                                                                                                                                                                                                               | X                    |                          |                        | X                | X                  |                                 | X                   |                     | X                                   |                              | X                            |                                              |                           |                                      | 6                              |   |
| Child Care Worker Interview                                                                   | Ross & Hoeltke (1985)       | Self-Report | 95 child care workers                                                                                                                                                                                                                                                         |                                                                                                          | N/a                                                                                                                                                                                                                                                       |                      |                          |                        | X                |                    |                                 | X                   | X                   |                                     |                              |                              |                                              |                           |                                      | 3                              |   |
|                                                                                               | Thomeses et al. (2008)      | Self-Report | 300 Dutch children (Study 1), 1020 Dutch children (Study 2), 49 American children (Study 3), 302 Dutch children (Study 4), 238 Dutch children (Study 5), 280 Dutch children (Study 6) (N=2189)                                                                                | R: 8-14                                                                                                  | 6 studies:<br>M (51%) F (49%)<br>M (51%) F (49%)<br>M (53%) F (47%)<br>M (57%) F (43%)<br>M (54%) F (46%)<br>M (47%) F (53%)<br>M (55%) F (45%)                                                                                                           | X                    | X                        |                        | X                |                    |                                 |                     |                     |                                     |                              |                              | X                                            |                           |                                      | 5                              |   |
| Childhood Narcissism Scale (CNS)                                                              | Thomeses et al. (2008)      | Self-Report | 436 undergraduate psychology students                                                                                                                                                                                                                                         |                                                                                                          | Female (20%) Male (80%)<br>Female (42%) Male (58%)                                                                                                                                                                                                        | X                    |                          |                        | X                | X                  | X                               | X                   |                     | X                                   | X                            | X                            | X                                            | X                         |                                      | 9                              |   |
| Child-Related Values Survey (CRVS)                                                            | Sockloskie (1990)           | Self-Report | 436 undergraduate psychology students                                                                                                                                                                                                                                         |                                                                                                          | Female (20%) Male (80%)<br>Female (42%) Male (58%)                                                                                                                                                                                                        | X                    |                          |                        | X                | X                  | X                               | X                   |                     | X                                   | X                            | X                            | X                                            | X                         |                                      | 0                              |   |
| Clinician and Group Consumer Assessment of Healthcare Providers and Systems Survey (CG-CAHPS) | van Zanten et al. (2005)    | Self-Report | 7746 doctors                                                                                                                                                                                                                                                                  | M = 30.5, SD = 5.3                                                                                       | Female (65.3%) Male (34.7%)                                                                                                                                                                                                                               |                      |                          |                        | X                |                    |                                 | X                   |                     | X                                   | X                            |                              |                                              |                           |                                      | 4                              |   |
| Clinician and Group Consumer Assessment of Healthcare Providers and Systems Survey (CG-CAHPS) | Roberts et al. (2019)       | Self-Report | 6493 patients from an outpatient clinic                                                                                                                                                                                                                                       | M = 60, SD = 15                                                                                          | Female (72%) Male (28%) Other (1%)                                                                                                                                                                                                                        | X                    |                          |                        | X                | X                  | X                               | X                   |                     | X                                   | X                            |                              |                                              |                           |                                      | 5                              |   |
| Clinician Associative Stigma Scale (CASS)                                                     | Yanos et al. (2017)         | Self-Report | 472 clinicians who work with people with serious mental illnesses                                                                                                                                                                                                             |                                                                                                          |                                                                                                                                                                                                                                                           | X                    |                          |                        | X                | X                  | X                               | X                   |                     | X                                   | X                            |                              |                                              |                           |                                      | 7                              |   |
| Cognitive, Affective, and Somatic Empathy Scale (CASES)                                       | Raine et al. (2022)         | Self-Report | 2604 community participants                                                                                                                                                                                                                                                   | M=36.95, SD=11.54                                                                                        | 51.5% female                                                                                                                                                                                                                                              | X                    |                          |                        | X                | X                  | X                               | X                   | X                   | X                                   | X                            |                              |                                              |                           |                                      | 6                              |   |
| Compassion Competence Scale (CCS)                                                             | Raine & Chen (2018)         | Self-Report | 428 children                                                                                                                                                                                                                                                                  | R: 11-12                                                                                                 | N/a                                                                                                                                                                                                                                                       | X                    |                          |                        | X                | X                  | X                               | X                   | X                   | X                                   | X                            |                              |                                              |                           |                                      | 5                              |   |
| Compassion Motivation and Action Scales (CMAS) for Compassion                                 | Gordon et al. (2022)        | Self-Report | 35 aged care workers                                                                                                                                                                                                                                                          | not indicated                                                                                            | not indicated                                                                                                                                                                                                                                             | X                    | X                        | X                      | X                | X                  | X                               | X                   | X                   |                                     |                              |                              |                                              |                           |                                      | 4                              |   |
| Compassion Fatigue Self-Test (CFST)                                                           | Jenkins & Baird (2002)      | Self-Report | 104 sexual assault and/or domestic violence counselors                                                                                                                                                                                                                        |                                                                                                          | N/a                                                                                                                                                                                                                                                       | X                    |                          |                        | X                | X                  | X                               | X                   |                     | X                                   |                              |                              |                                              |                           |                                      | 5                              |   |
| Compassion Motivation and Action Scales (CMAS) for Self-Compassion                            | Steindl et al. (2021)       | Self-Report | 621 adults                                                                                                                                                                                                                                                                    | M=43.55, SD=14.68                                                                                        | 81.3% females, 18.7% male                                                                                                                                                                                                                                 | X                    |                          |                        | X                | X                  | X                               | X                   | X                   | X                                   | X                            |                              |                                              |                           |                                      | 7                              |   |
| Compassion Motivation and Action Scales (CMAS) for Self-Compassion                            | Steindl et al. (2021)       | Self-Report | 622 adults                                                                                                                                                                                                                                                                    | M=43.55, SD=14.69                                                                                        | 81.3% females, 18.7% male                                                                                                                                                                                                                                 | X                    |                          |                        | X                | X                  | X                               | X                   | X                   | X                                   | X                            |                              |                                              |                           |                                      | 7                              |   |
| Compassion Scale                                                                              | Martins et al. (2013)       | Self-Report | 310 adults                                                                                                                                                                                                                                                                    |                                                                                                          | Female (66.8%) Male (33.2%)<br>Study 1 - Female (65%) Male (35%)<br>Study 2 - Female (53%) Male (47%)<br>Study 3 - Female (46%) Male (54%)<br>Study 4 - Female (65%) Male (35%)<br>Study 5 - Female (72%) Male (28%)<br>Study 6 - Female (45%) Male (55%) | X                    |                          |                        | X                |                    |                                 | X                   |                     | X                                   |                              |                              |                                              |                           |                                      |                                | 3 |
| Compassion Scale (CS)                                                                         | Pommier et al. (2020)       | Self-Report | 465 adults (Study 1), 510 adults (Study 2), 80 adults (Study 3), 1394 adults (Study 4), 172 adults (Study 5), 913 adults (Study 6) (N=3524)                                                                                                                                   |                                                                                                          | Female (47%) Male (53%)                                                                                                                                                                                                                                   | X                    | X                        |                        | X                | X                  | X                               | X                   |                     | X                                   | X                            | X                            | X                                            | X                         |                                      | 10                             |   |
| Compassionate Care Assessment Tool (CCAT)ID                                                   | Bumell & Agan (2013)        | Self-Report | 250 medical/surgical inpatients                                                                                                                                                                                                                                               |                                                                                                          | Female (47%) Male (53%)                                                                                                                                                                                                                                   | X                    |                          |                        | X                | X                  |                                 | X                   |                     | X                                   |                              |                              |                                              |                           |                                      | 5                              |   |
| Compassionate Engagement and Action Scales (CEAS)                                             | Murfield et al. (2021)      | Self-Report | 189 family carers of older adults                                                                                                                                                                                                                                             | M=59.4, SD=11.5                                                                                          | 87.7% female, 11.7% male                                                                                                                                                                                                                                  |                      |                          |                        |                  |                    |                                 |                     |                     | X                                   | X                            |                              |                                              |                           |                                      | 2                              |   |
| Compassionate Love Scale (CLS)                                                                | Sprecher & Fehr (2005)      | Self-Report | 354 undergraduate students                                                                                                                                                                                                                                                    |                                                                                                          | Female (65.3%) Male (34.7%)                                                                                                                                                                                                                               | X                    |                          |                        | X                | X                  |                                 | X                   |                     | X                                   | X                            |                              |                                              | X                         |                                      | 5                              |   |
| Compassionate Love Scale for Humanity - Short Form (CLS-H-SF)                                 |                             | Self-Report |                                                                                                                                                                                                                                                                               |                                                                                                          |                                                                                                                                                                                                                                                           | X                    |                          |                        | X                | X                  | X                               | X                   |                     | X                                   | X                            |                              | X                                            | X                         |                                      | 9                              |   |

| Instrument                                                     | Reference                  | Study Type  | Study Population                                                                                                                                                                                                                            | Age (range [R] and/or Mean [M] with Standard Deviation [SD])                                                         | Gender                                                                                                                                                                        | Internal Consistency | Test Re-Test Reliability | Interrater Reliability | Content Validity | Construct Validity | Discriminant/Divergent Validity | Convergent Validity | Predictive Validity | Factor Analysis/Principal Component | Confirmatory Factor Analysis | Structural Equation Modeling | Control/Correlation with Social Desirability | Other Advanced Statistics | Other Biased Responding or Lie Scale | Total Psychometric Assessments |   |
|----------------------------------------------------------------|----------------------------|-------------|---------------------------------------------------------------------------------------------------------------------------------------------------------------------------------------------------------------------------------------------|----------------------------------------------------------------------------------------------------------------------|-------------------------------------------------------------------------------------------------------------------------------------------------------------------------------|----------------------|--------------------------|------------------------|------------------|--------------------|---------------------------------|---------------------|---------------------|-------------------------------------|------------------------------|------------------------------|----------------------------------------------|---------------------------|--------------------------------------|--------------------------------|---|
|                                                                | Williams et al. (2022)     | Self-Report | 225 undergraduate paramedicine students                                                                                                                                                                                                     | M = 21                                                                                                               | 65.8% female<br>Female (66%) Male (34%)                                                                                                                                       | X                    |                          |                        |                  |                    |                                 |                     |                     | X                                   |                              |                              |                                              |                           |                                      | 2                              |   |
|                                                                | Chiesi et al. (2020)       | Self-Report | 790 undergraduate students                                                                                                                                                                                                                  |                                                                                                                      |                                                                                                                                                                               | X                    |                          |                        | X                | X                  |                                 | X                   |                     |                                     |                              |                              |                                              | X                         |                                      | 5                              |   |
| Complementary Measure of Psychotherapy Measure (COMPM)         | Chui et al. (2021)         | Self-Report | study 1: 10 graduate students/early career psychologists and 35 experienced therapists; study 2: 264 adults currently in outpatient psychotherapy and 571 adults; study 3: 31 clients seeking psychotherapy for depression and 9 therapists | study 2: development sample M= 36.1, SD 12.7; validation sample M= 32.9, SD 13.3; study 3: clients M=34.7, SD = 9.13 | study 1: 25 females; study 2: development 207 Female, 52 male, 5 other; validation 442 female, 122 male, 6 other; study 3: 24 female                                          | X                    | X                        |                        | X                | X                  | X                               | X                   | X                   | X                                   | X                            | X                            |                                              |                           |                                      | 10                             |   |
| Comprehensive Object Relations Profile (CORP)                  | Burke et al. (1986)        | Self-Report | 10 neurotic patients, 10 borderline patients, and 10 schizophrenic patients (N=30)                                                                                                                                                          |                                                                                                                      | Female (57%) Male (43%)                                                                                                                                                       | X                    | X                        |                        | X                | X                  | X                               |                     | X                   |                                     |                              |                              |                                              |                           |                                      | 4                              |   |
| Conroy Personality Scales (CPS)                                | Rushon & Irwing (2009)     | Self-Report |                                                                                                                                                                                                                                             |                                                                                                                      | Female (51%) Male (49%)                                                                                                                                                       | X                    |                          |                        | X                | X                  |                                 |                     |                     | X                                   | X                            |                              |                                              | X                         |                                      | 6                              |   |
|                                                                | Caprara et al. (2001)      | Self-Report |                                                                                                                                                                                                                                             |                                                                                                                      | Female (63%) Male (37%)                                                                                                                                                       | X                    |                          |                        | X                | X                  |                                 |                     |                     |                                     | X                            |                              |                                              | X                         |                                      | 3                              |   |
|                                                                | Forbes et al. (1974)       | Self-Report | 752 American and British undergraduate students and university employees                                                                                                                                                                    |                                                                                                                      | Female (68.2%) Male (31.9%)                                                                                                                                                   | X                    |                          |                        | X                | X                  |                                 |                     |                     | X                                   |                              |                              |                                              |                           |                                      | 5                              |   |
| Connection Index (CI12)                                        | Puder et al. (2022)        | Self-Report | 50 medical residents                                                                                                                                                                                                                        | N/A                                                                                                                  | 76 male, 53 female                                                                                                                                                            | X                    | X                        |                        | X                |                    |                                 |                     |                     | X                                   |                              |                              |                                              |                           |                                      | 1                              |   |
| Connor-Davidson Resilience Scale 10 (CD-RISC-10)               | Heritage et al. (2021)     | Self-Report | 708 nursing students                                                                                                                                                                                                                        | M=26.43                                                                                                              | 86% female                                                                                                                                                                    | X                    |                          |                        | X                |                    |                                 |                     |                     | X                                   | X                            |                              |                                              |                           |                                      | 4                              |   |
| Consultation and Relational Empathy (CARE) Measure             | Keulen et al. (2020)       | Self-Report | 84 orthopedic patients                                                                                                                                                                                                                      | 20-88                                                                                                                | 44 female                                                                                                                                                                     | X                    |                          | X                      | X                | X                  |                                 | X                   | X                   | X                                   | X                            |                              |                                              | X                         |                                      | 8                              |   |
|                                                                | Bikker et al. (2017)       | Self-Report | 943 adults attending consultations with sexual health nurses (n=20)                                                                                                                                                                         | M = 28.8                                                                                                             | Female (68%) Male (32%)                                                                                                                                                       | X                    |                          |                        | X                |                    |                                 | X                   |                     |                                     |                              |                              |                                              |                           |                                      | 2                              |   |
|                                                                | Bikker et al. (2015)       | Self-Report | 774 adult patients from GP practices                                                                                                                                                                                                        | 16 and older                                                                                                         | Female (57.8%) Male (42.2%)                                                                                                                                                   | X                    |                          |                        | X                |                    |                                 | X                   | X                   |                                     |                              |                              |                                              |                           |                                      | 3                              |   |
|                                                                | Chen et al. (2015)         | Self-Report | 158 medical students                                                                                                                                                                                                                        |                                                                                                                      | Female (39%) Male (61%)                                                                                                                                                       | X                    |                          |                        | X                | X                  |                                 | X                   |                     |                                     | X                            |                              |                                              |                           |                                      | 5                              |   |
|                                                                | Kersten et al. (2012)      | Self-Report | 213 pain patients                                                                                                                                                                                                                           | M = 66.8, SD = 8.3                                                                                                   | Female (58%) Male (42%)                                                                                                                                                       | X                    |                          |                        |                  |                    |                                 |                     |                     | X                                   |                              |                              |                                              | X                         |                                      | 3                              |   |
|                                                                | Mercer et al. (2008)       | Self-Report | 1582 patients being treated by anaesthetists (n=31)                                                                                                                                                                                         |                                                                                                                      | Patients: Female (60.1%) Male (39.9%)                                                                                                                                         | X                    |                          | X                      |                  |                    |                                 |                     |                     |                                     |                              |                              |                                              |                           |                                      | 2                              |   |
|                                                                | Mercer & Murphy (2008)     | Self-Report | 1015 patients rating outpatient medical consultants (n=25) in Scotland                                                                                                                                                                      |                                                                                                                      | Female (64.8%) Male (35.2%)                                                                                                                                                   | X                    |                          |                        | X                |                    |                                 |                     |                     | X                                   |                              |                              |                                              |                           |                                      | 4                              |   |
|                                                                | Mercer et al. (2004)       | Self-Report | 20 Scottish medical outpatients (high economic deprivation) (Study 1), 13 Scottish medical outpatients (low economic deprivation) (Study 2), 10 Scottish medical outpatients (high economic deprivation) (Study 3) (N=43)                   |                                                                                                                      | Female (60.6%) Male (39.4%)                                                                                                                                                   |                      |                          |                        | X                | X                  |                                 |                     |                     |                                     |                              |                              |                                              |                           |                                      | 2                              |   |
| Consumer Orientation Questionnaire (SCOI)                      | Saunders & Munro (2000)    | Self-Report | 136 undergraduate psychology students                                                                                                                                                                                                       |                                                                                                                      | Female (72.8%) Male (27.2%)                                                                                                                                                   | X                    | X                        |                        | X                | X                  | X                               | X                   |                     |                                     |                              |                              | X                                            |                           |                                      | 6                              |   |
| Counselor Behavior Analysis (CBA)                              | Waugh et al. (2021)        | Self-Report | 24 graduate students and PhD-Level psychologists                                                                                                                                                                                            | M = 29.36, SD = 8.23                                                                                                 | not indicated                                                                                                                                                                 | X                    |                          | X                      | X                | X                  | X                               | X                   | X                   |                                     | X                            |                              |                                              |                           |                                      | 8                              |   |
|                                                                | Gabbard et al. (1986)      | Self-Report | 44 practicing counselors                                                                                                                                                                                                                    |                                                                                                                      | N/A                                                                                                                                                                           | X                    |                          | X                      | X                | X                  | X                               | X                   | X                   |                                     | X                            | X                            |                                              |                           |                                      | 7                              |   |
| Curtin Vicarious Response Scales (CVRS)                        | Curtin & Hammond (2012)    | Self-Report | 664 Irish dental clinicians                                                                                                                                                                                                                 |                                                                                                                      | Female (59.6%) Male (40.4%)                                                                                                                                                   | X                    |                          |                        | X                |                    |                                 | X                   |                     | X                                   |                              |                              |                                              |                           |                                      | 4                              |   |
|                                                                | Zhang et al. (2016)        | Self-Report | 1255 athletic persons                                                                                                                                                                                                                       |                                                                                                                      | Study 1: Female 37.1%, Male 62.9%; Study 2: Female 50.2%, Male 49.8%; Study 3: Female 41.5%, Male 58.5%; Study 4: Female 46.4%, Male 53.6%; Study 5: Female 40.4%, Male 59.6% | X                    |                          |                        | X                | X                  | X                               | X                   | X                   |                                     | X                            | X                            |                                              |                           |                                      |                                | 7 |
| Defending Behaviors Scale (DBS)                                | Lambe & Craig (2020)       | Self-Report | 572 early adolescents                                                                                                                                                                                                                       |                                                                                                                      | Female (50%) Male (49%) Other (1%)                                                                                                                                            | X                    | X                        |                        | X                | X                  | X                               | X                   | X                   | X                                   |                              | X                            |                                              |                           |                                      | 9                              |   |
| Dental Beliefs Survey - Revised (DBS-R)                        | Kvale et al. (2004)        | Self-Report | 202 dental patients                                                                                                                                                                                                                         |                                                                                                                      | Female (77%) Male (23%)                                                                                                                                                       | X                    |                          |                        | X                |                    |                                 |                     |                     | X                                   | X                            |                              |                                              |                           |                                      | 4                              |   |
| Dental-Patient Relationship Skills Assessment [Unnamed]        | Orsini & Jerez (2014)      | Self-Report | 444 undergraduate dental students                                                                                                                                                                                                           |                                                                                                                      | N/A                                                                                                                                                                           | X                    |                          |                        | X                | X                  |                                 |                     |                     | X                                   |                              |                              |                                              |                           |                                      | 4                              |   |
| Diabetes-Specific Self-Compassion Scale (SCS-Dp)               | Tanenbaum et al. (2020)    | Self-Report | 198 parents of youth with Type-1 Diabetes                                                                                                                                                                                                   | M = 44, SD = 8.9                                                                                                     | Female (88%) Male (12%)                                                                                                                                                       | X                    |                          |                        | X                | X                  | X                               | X                   |                     |                                     | X                            |                              |                                              |                           |                                      | 4                              |   |
| Driving While Impaired Therapeutic Educator Inventory (DTEI)   | DeMuro et al. (2011)       | Self-Report | 569 adults                                                                                                                                                                                                                                  | M = 46.39                                                                                                            | Female (61.9%) Male (38.1%)                                                                                                                                                   | X                    |                          |                        | X                |                    |                                 |                     |                     | X                                   |                              |                              |                                              |                           |                                      | 3                              |   |
| DSM-5 Levels of Personality Functioning Questionnaire (DLQPFQ) | Waugh et al. (2021)        | Self-Report | 29 graduate students and PhD-Level psychologists                                                                                                                                                                                            | M = 29.36, SD = 8.23                                                                                                 | not indicated                                                                                                                                                                 | X                    |                          | X                      | X                | X                  | X                               | X                   |                     |                                     |                              |                              |                                              |                           |                                      | 6                              |   |
|                                                                | Huprich et al. (2018)      | Self-Report | 140 outpatient psychiatry and internal medicine clinicians                                                                                                                                                                                  |                                                                                                                      | Female (73.5%) Male (26.5%)                                                                                                                                                   | X                    |                          |                        | X                |                    | X                               | X                   |                     |                                     |                              |                              |                                              |                           |                                      | 4                              |   |
|                                                                | Nelson et al. (2018)       | Self-Report | 140 patients who have been in treatment at outpatient psychiatry and internal medicine clinics                                                                                                                                              | 18+                                                                                                                  | Patients: Female (73.5%) Male (26.5%)                                                                                                                                         |                      |                          |                        | X                |                    |                                 | X                   |                     |                                     |                              |                              |                                              |                           |                                      | 1                              |   |
| Dymond's Test of Insight and Empathy                           | Lindgren & Robinson (1953) | Self-Report | 60 undergraduate psychology students                                                                                                                                                                                                        |                                                                                                                      | N/A                                                                                                                                                                           |                      |                          |                        | X                |                    |                                 |                     |                     |                                     |                              |                              |                                              |                           |                                      | 1                              |   |
| ECRC Altruism Scale                                            | Bhatta et al. (2021)       | Self-Report | 366 older adults free from significant physical and psychological health problems                                                                                                                                                           | M= 66.17, SD = 4.53                                                                                                  | 68% female                                                                                                                                                                    | X                    |                          |                        | X                | X                  | X                               | X                   | X                   | X                                   | X                            | X                            | X                                            |                           |                                      | 9                              |   |
| Effects of Meditation (EOM) Scale                              | Skipper et al. (2015)      | Self-Report | 254 individuals currently practicing meditation                                                                                                                                                                                             | R: 20-91                                                                                                             | N/A                                                                                                                                                                           | X                    |                          |                        | X                |                    |                                 |                     | X                   |                                     | X                            |                              |                                              |                           |                                      | 4                              |   |
| Eight-Item Toronto Alexithymia Scale (TAS-8)                   | Williams & Gotham (2011)   | Self-Report | 743 verbal autistic adults and 721 general population controls                                                                                                                                                                              |                                                                                                                      | autistic adults M=30.91, SD=7.02; control M=30.92, SD=13.01                                                                                                                   |                      |                          |                        | X                | X                  | X                               | X                   |                     | X                                   | X                            |                              |                                              |                           |                                      | 5                              |   |
| Emotional Accuracy Research Scale (EARS)                       | Geher et al. (2011)        | Self-Report | 124 undergraduate students                                                                                                                                                                                                                  |                                                                                                                      | Female (58%) Male (42%)                                                                                                                                                       | X                    |                          |                        | X                |                    | X                               | X                   | X                   |                                     |                              |                              |                                              |                           |                                      | 4                              |   |
| Emotional Intelligence (EI) Instrument                         | Carrothers et al. (2000)   | Self-Report | 147 medical school applicants                                                                                                                                                                                                               |                                                                                                                      | Female (56%) Male (44%)                                                                                                                                                       | X                    |                          |                        | X                | X                  |                                 |                     | X                   |                                     |                              |                              |                                              |                           |                                      | 4                              |   |
| Emotional Intelligence Inventory (EI)                          | Tapia & Marsh (2006)       | Self-Report |                                                                                                                                                                                                                                             |                                                                                                                      | Female (64%) Male (36%)                                                                                                                                                       | X                    |                          | X                      | X                |                    |                                 |                     |                     | X                                   |                              |                              |                                              |                           |                                      | 6                              |   |
|                                                                | Singh (2004)               | Self-Report | 263 managers                                                                                                                                                                                                                                |                                                                                                                      | Female (27.4%) Male (72.6%)                                                                                                                                                   |                      |                          | X                      |                  |                    |                                 |                     |                     |                                     |                              |                              |                                              |                           |                                      |                                | 2 |
|                                                                | Tapia (2001)               | Self-Report | 111 Mexican high school students                                                                                                                                                                                                            |                                                                                                                      | Female (37%) Male (63%)                                                                                                                                                       | X                    | X                        |                        | X                |                    |                                 |                     |                     | X                                   |                              |                              |                                              |                           |                                      |                                | 4 |

| Instrument                                                           | Reference                       | Study Type  | Study Population                                                                                                                                                                                                                | Age (range [R] and/or Mean [M] with Standard Deviation [SD])                          | Gender                                                                                                       | Internal Consistency | Test Re-Test Reliability | Interrater Reliability | Content Validity             | Construct Validity | Discriminant/Divergent Validity | Convergent Validity | Predictive Validity | Factor Analysis/Principal Component | Confirmatory Factor Analysis | Structural Equation Modeling | Control/Correlation with Social Desirability | Other Advanced Statistics | Other Biased Responding or Lie Scale | Total Psychometric Assessments |   |
|----------------------------------------------------------------------|---------------------------------|-------------|---------------------------------------------------------------------------------------------------------------------------------------------------------------------------------------------------------------------------------|---------------------------------------------------------------------------------------|--------------------------------------------------------------------------------------------------------------|----------------------|--------------------------|------------------------|------------------------------|--------------------|---------------------------------|---------------------|---------------------|-------------------------------------|------------------------------|------------------------------|----------------------------------------------|---------------------------|--------------------------------------|--------------------------------|---|
| Emotional Intelligence Scale (EIS)                                   | Tapia & Marsh (2006)            | Self-Report |                                                                                                                                                                                                                                 |                                                                                       | Female (64%) Male (36%)                                                                                      | X                    |                          |                        |                              |                    |                                 | X                   | X                   |                                     | X                            |                              |                                              |                           |                                      | 4                              |   |
|                                                                      | Hakanen (2004)                  | Self-Report | 153 undergraduate students                                                                                                                                                                                                      | M = 25, SD = 4.4                                                                      | Female (54.2%) Male (45.8%)                                                                                  | X                    |                          |                        |                              |                    |                                 | X                   |                     |                                     | X                            |                              |                                              |                           |                                      | 2                              |   |
| Emotional Logic Development Profile (ELDP)                           | Zahra et al. (2016)             | Self-Report | 118 adults                                                                                                                                                                                                                      |                                                                                       |                                                                                                              | X                    |                          |                        | X                            |                    |                                 |                     |                     |                                     |                              |                              |                                              |                           |                                      | 2                              |   |
| Emotional Response Questionnaire (ERQ)                               | Everson et al. (2018)           | Self-Report | 460 nursing students                                                                                                                                                                                                            |                                                                                       | N/a                                                                                                          | X                    |                          |                        |                              |                    |                                 |                     |                     |                                     | X                            | X                            |                                              |                           |                                      | 3                              |   |
| Emotional Skills and Competence Questionnaire (ESCC)                 | Taklić et al. (2009)            | Self-Report | 381 high school students                                                                                                                                                                                                        | R: 14-19                                                                              | N/a                                                                                                          | X                    |                          |                        | X                            | X                  | X                               | X                   | X                   | X                                   | X                            | X                            |                                              |                           |                                      | 8                              |   |
| Empathetic Care Scale (ECS)                                          | Lamberton et al. (2015)         | Self-Report | 28 healthcare paraprofessionals (Study 1), 138 healthcare paraprofessionals (Study 2), 125 healthcare paraprofessionals (Study 3), 16 healthcare paraprofessionals (Study 4), 15 healthcare paraprofessionals (Study 5) (N=325) | Study 2: M = 46.3                                                                     | Female (92.8%) Male (7.2%)<br>Female (88.6%) Male (11.4%)                                                    |                      | X                        |                        | X                            | X                  | X                               | X                   | X                   | X                                   | X                            | X                            | X                                            | X                         |                                      | 9                              |   |
| Empathic Communication Coding System (ECCS)                          | Bylund & Makoul (2002)          | Self-Report | 100 patient encounters with general internists (n=20) rated by researchers                                                                                                                                                      |                                                                                       | Female (20%) Male (80%)                                                                                      | X                    |                          |                        | X                            | X                  | X                               | X                   | X                   | X                                   | X                            | X                            | X                                            | X                         |                                      | 2                              |   |
| Empathic Experience Scale (EES)                                      |                                 |             |                                                                                                                                                                                                                                 |                                                                                       | study 1: 69 men, 81 women; study 2: 320 female, 215 male; study 3: 338 men, 319 women                        | X                    |                          |                        | X                            | X                  | X                               | X                   | X                   | X                                   | X                            | X                            | X                                            | X                         |                                      | 9                              |   |
|                                                                      | Suwinyattichaiyom et al. (2021) | Self-Report | study 1: 151 undergraduate students; study 2: 535 undergraduate students; study 3: 659 undergraduate participants                                                                                                               | study 2: M=21.22; study 3: M=19.54                                                    | Female (53.8%) Male (46.2%)                                                                                  | X                    |                          |                        | X                            | X                  | X                               | X                   | X                   | X                                   | X                            | X                            | X                                            | X                         |                                      | 8                              |   |
| Empathic Expressions Scale (EES)                                     | Innamorati et al. (2019)        | Self-Report | 921 Italian adults (Study 1), 504 Italian adults (Study 2) (N=1425)                                                                                                                                                             | 18+                                                                                   |                                                                                                              | X                    |                          |                        |                              |                    | X                               |                     |                     | X                                   | X                            | X                            | X                                            |                           |                                      | 7                              |   |
| Empathic Tendency Scale (ETS)                                        | Koçak & Onen (2013)             | Self-Report | 720 student teachers                                                                                                                                                                                                            |                                                                                       | Female (71.3%) Male (28.7%)                                                                                  | X                    | X                        |                        |                              |                    |                                 |                     |                     | X                                   | X                            |                              |                                              |                           |                                      | 4                              |   |
| Empathy Accuracy (EA) Task                                           | Vilas et al. (2021)             | Self-Report | study 1: 16 targets, 59 perceivers; study 2: 71 participants                                                                                                                                                                    | study 1: M=18.02, SD=0.9 males; 61; study 2: M=15.26, SD=1.28                         |                                                                                                              | X                    | X                        |                        | X                            |                    |                                 | X                   |                     |                                     | X                            | X                            |                                              |                           |                                      | 2                              |   |
| Empathy Assessment Index (EAI)                                       |                                 |             |                                                                                                                                                                                                                                 |                                                                                       | Female (83%) Male (17%)                                                                                      | X                    | X                        |                        | X                            |                    |                                 | X                   |                     | X                                   | X                            |                              |                                              |                           |                                      | 6                              |   |
|                                                                      | Gerdes et al. (2011)            | Self-Report | 312 undergraduate and graduate students                                                                                                                                                                                         |                                                                                       | Female (74.4%) Male (25.6%)                                                                                  | X                    | X                        |                        | X                            |                    |                                 | X                   |                     | X                                   | X                            |                              |                                              |                           |                                      | 5                              |   |
|                                                                      | Lietz et al. (2011)             | Self-Report | 773 adults                                                                                                                                                                                                                      |                                                                                       | Female (74.4%) Male (25.6%)                                                                                  | X                    | X                        |                        | X                            |                    |                                 | X                   |                     | X                                   | X                            |                              |                                              |                           |                                      | 4                              |   |
| Empathy Assessment Scale (EAS)                                       | Malakoglou (2022)               | Self-Report | 651 students                                                                                                                                                                                                                    | M=20.34, SD=2.67                                                                      | 53.8% female, 46.4% male                                                                                     | X                    | X                        |                        | X                            | X                  |                                 | X                   |                     | X                                   | X                            |                              |                                              |                           |                                      | 7                              |   |
| Empathy Components Questionnaire (ECO)                               | Batchelder et al. (2017)        | Self-Report | 101 undergraduate students and university staff                                                                                                                                                                                 |                                                                                       | Female (65.34%) Male (34.66%)                                                                                |                      |                          |                        |                              |                    |                                 | X                   |                     | X                                   | X                            |                              |                                              |                           |                                      | 3                              |   |
| Empathy-Enhancing Virtual Evolving Environment (EEVEE)               | Jackson et al. (2015)           | Self-Report | 19 adults                                                                                                                                                                                                                       |                                                                                       | N/a                                                                                                          |                      |                          |                        |                              |                    |                                 |                     |                     |                                     |                              |                              |                                              | X                         |                                      | 1                              |   |
| Empathy for Action Pain Picture Database (EPSS-Action_Picture)       | Meng et al. (2023)              | Self-Report | 70 adults                                                                                                                                                                                                                       | M=22.66, SD=2.17                                                                      | 36 females                                                                                                   | X                    |                          |                        | X                            |                    |                                 |                     |                     |                                     |                              |                              |                                              |                           |                                      | 2                              |   |
| Empathy for Action Pain Video Database (EPSS-Action_Video)           | Meng et al. (2023)              | Self-Report | 70 adults                                                                                                                                                                                                                       | M=23.23, SD=2.15                                                                      | 34 females                                                                                                   | X                    |                          |                        | X                            |                    |                                 |                     |                     |                                     |                              |                              |                                              |                           |                                      | 2                              |   |
| Empathy for Face Pain Picture Database (EPSS-Face)                   | Meng et al. (2023)              | Self-Report | 70 paid volunteers                                                                                                                                                                                                              | M=22.29, SD=2.53                                                                      | 35 women                                                                                                     | X                    |                          |                        | X                            |                    |                                 |                     |                     |                                     |                              |                              |                                              |                           |                                      | 2                              |   |
| Empathy for Limb Pain Picture Database (EPSS-Limb)                   | Meng et al. (2023)              | Self-Report | 70 paid volunteers                                                                                                                                                                                                              | M=25.34, SD=1.34                                                                      | 35 women                                                                                                     | X                    |                          |                        | X                            |                    |                                 |                     |                     |                                     |                              |                              |                                              |                           |                                      | 2                              |   |
| Empathy for Pain Scale (EPS)                                         | Giunmarrà et al. (2015)         | Self-Report | 161 pain patients, 245 adult controls                                                                                                                                                                                           |                                                                                       | Study 1: Female (56%) Male (44%)<br>Study 2: Female (78%) Male (22%)                                         | X                    |                          |                        | X                            | X                  | X                               | X                   | X                   | X                                   | X                            |                              |                                              |                           |                                      | 8                              |   |
| Empathy for Voice Pain Database (EPSS-Voice)                         | Meng et al. (2023)              | Self-Report | 70 adults                                                                                                                                                                                                                       | M=22.89, SD=2.32                                                                      | 35 women                                                                                                     | X                    |                          |                        | X                            |                    |                                 |                     |                     |                                     |                              |                              |                                              |                           |                                      | 2                              |   |
| Empathy Gradient Questionnaire (EGQ)                                 | Hollar (2017)                   | Self-Report | 161 undergraduate students and educational professionals                                                                                                                                                                        | R: 18-60+                                                                             | Female (48.4%) Male (51.6%)                                                                                  | X                    |                          |                        |                              |                    |                                 |                     |                     | X                                   | X                            |                              |                                              |                           |                                      | 3                              |   |
| Empathy Index (EI)                                                   |                                 |             |                                                                                                                                                                                                                                 |                                                                                       | Female (52.5%) Male (47.5%)                                                                                  | X                    |                          |                        |                              |                    |                                 | X                   |                     | X                                   | X                            |                              |                                              | X                         |                                      | 5                              |   |
|                                                                      | Murphy et al. (2018)            | Self-Report | 389 adults                                                                                                                                                                                                                      |                                                                                       | Female (51.6%) Male (48.4%)                                                                                  | X                    |                          |                        |                              |                    |                                 | X                   |                     | X                                   | X                            |                              |                                              | X                         |                                      | 2                              |   |
|                                                                      | Jordan et al. (2016)            | Self-Report | 95 adults recruited through MTurk                                                                                                                                                                                               | M = 36.52                                                                             | Female (51.6%) Male (48.4%)                                                                                  | X                    |                          |                        |                              |                    |                                 | X                   |                     | X                                   | X                            |                              |                                              |                           |                                      | 3                              |   |
| Empathy Measure for Parents Analog Task - Emotion Audio (EMPAT-EA)   | Gonzalez & Rodriguez (2021)     | Self-Report | study 1: 142 childless undergraduate students; study 2: 212 parents                                                                                                                                                             | study 1: M=18.77, SD=1.56; study 2: mothers M=30.44, SD=5.9, fathers M=32.65, SD=6.75 | study 1: 59% female; study 2: 119 mothers, 93 fathers                                                        | X                    |                          |                        | X                            | X                  |                                 | X                   |                     | X                                   | X                            |                              |                                              |                           |                                      | 5                              |   |
| Empathy Measure for Parents Analog Task - Emotion Scripts (EMPAT-ES) | Gonzalez & Rodriguez (2021)     | Self-Report | study 1: 142 childless undergraduate students; study 2: 212 parents                                                                                                                                                             | study 1: M=18.77, SD=1.56; study 2: mothers M=30.44, SD=5.9, fathers M=32.65, SD=6.75 | study 1: 59% female; study 2: 119 mothers, 93 fathers                                                        | X                    |                          |                        | X                            | X                  |                                 | X                   |                     | X                                   | X                            |                              |                                              |                           |                                      | 5                              |   |
| Empathy Questionnaire for Children and Adolescents (EmQue-CA)        | Overgasau et al. (2017)         | Self-Report | 1250 children/adolescents                                                                                                                                                                                                       | 10 or older                                                                           | Female (50%) Male (50%)                                                                                      | X                    | X                        |                        | X                            | X                  | X                               | X                   | X                   | X                                   | X                            |                              | X                                            | X                         |                                      | 6                              |   |
| Empathy Quotient (EQ)                                                |                                 |             | 215 adult individuals without concomitant intellectual disability                                                                                                                                                               |                                                                                       |                                                                                                              | X                    | X                        |                        | X                            | X                  | X                               | X                   | X                   | X                                   | X                            |                              | X                                            | X                         |                                      | 10                             |   |
|                                                                      | Jones et al. (2022)             | Self-Report |                                                                                                                                                                                                                                 | M=31.18, SD=10.45                                                                     | 118 male                                                                                                     |                      |                          |                        | X                            | X                  | X                               | X                   | X                   | X                                   | X                            |                              |                                              |                           |                                      | 3                              |   |
|                                                                      | Peretti et al. (2019)           | Self-Report |                                                                                                                                                                                                                                 |                                                                                       | Female (59%) Male (41%)                                                                                      |                      |                          |                        |                              |                    | X                               |                     |                     | X                                   | X                            |                              |                                              |                           |                                      | 3                              |   |
|                                                                      | Wright & Skagerberg (2012)      | Self-Report | 5186 adults recruited through Qualtrics                                                                                                                                                                                         |                                                                                       | online Qualtrics population                                                                                  | X                    |                          |                        |                              |                    | X                               |                     |                     |                                     |                              |                              |                                              |                           |                                      | 2                              |   |
|                                                                      | Allison et al. (2011)           | Self-Report | 658 individuals with an autism spectrum diagnosis, 1375 family members of individuals with autism spectrum diagnosis, and 3344 typical adult controls (N=5377)                                                                  |                                                                                       | Female (60.7%) Male (39.3%)                                                                                  | X                    |                          |                        |                              |                    |                                 |                     |                     |                                     | X                            |                              |                                              | X                         |                                      | 3                              |   |
|                                                                      | Nettie (2007)                   | Self-Report | 277 adults (Study 1), 195 adults (Study 2), 76 non-heterosexual adults (Study 3) (N=548)                                                                                                                                        |                                                                                       | Study 1: Female (62.5%) Male (37.5%), Study 2: Female (67.7%) Male (32.3%), Study 3: Female (29%) Male (71%) |                      |                          |                        | people online, international |                    |                                 |                     |                     | X                                   |                              |                              |                                              |                           |                                      |                                | 1 |
|                                                                      | Lawrence et al. (2004)          | Self-Report | 52 mental health professionals and staff (Study 1), 172 adults (Study 2) (N=224)                                                                                                                                                | Study 1: M = 32.5                                                                     | Test group: Female (60.7%) Male (39.3%)                                                                      |                      | X                        |                        | X                            | X                  |                                 | X                   |                     | X                                   | X                            |                              | X                                            |                           |                                      | 5                              |   |
| Empathy Quotient - Child (EQ-C)                                      | Auyeung et al. (2009)           | Self-Report | 1256 parents of typically developing children                                                                                                                                                                                   | R: 18-2-26.3, M = 21.0, SD = 2.58                                                     | N/a                                                                                                          | X                    | X                        |                        |                              |                    |                                 |                     |                     |                                     |                              |                              |                                              |                           |                                      | 2                              |   |
| Empathy Quotient - Short (EQ-Short)                                  | Wakabayashi et al. (2006)       | Self-Report | 1761 English undergraduate students                                                                                                                                                                                             |                                                                                       | Female (59%) Male (41%)                                                                                      | X                    |                          |                        | X                            | X                  |                                 | X                   |                     | X                                   | X                            |                              |                                              |                           |                                      | 4                              |   |
| Empathy Scale for Social Workers (ESSW)                              | King & Holosko (2012)           | Self-Report | 271 social workers                                                                                                                                                                                                              |                                                                                       | N/a                                                                                                          | X                    |                          |                        | X                            | X                  | X                               | X                   | X                   | X                                   | X                            |                              |                                              |                           |                                      | 6                              |   |
| Empathy Selection Task                                               |                                 |             |                                                                                                                                                                                                                                 |                                                                                       |                                                                                                              | X                    | X                        |                        |                              | X                  |                                 | X                   | X                   |                                     |                              |                              |                                              | X                         |                                      | 6                              |   |
|                                                                      | Ferguson & Inzlicht (2022)      | Self-Report | sample 1: 47 general adult population; sample 2: 42 undergraduate students                                                                                                                                                      | study 1: M age = 35.9 years<br>study 2: M age = 19 years                              | study 1: 18 female, 29 male<br>study 2: 34 female, 8 male                                                    | X                    | X                        |                        |                              |                    |                                 |                     |                     |                                     |                              |                              |                                              |                           |                                      | 2                              |   |
|                                                                      | Cameron et al. (2019)           | Self-Report | 52 adults recruited through MTurk (Study 1), 47 adults recruited through MTurk (Study 2), 196 adults recruited through MTurk (Study 3) (N=295)                                                                                  |                                                                                       | Female (56.5%) Male (43.5%)                                                                                  |                      |                          |                        | X                            | X                  |                                 | X                   | X                   |                                     |                              |                              |                                              | X                         |                                      | 4                              |   |

| Instrument                                                                           | Reference                     | Study Type  | Study Population                                                                                                                                                                                                                                                          | Age (range [R] and/or Mean [M] with Standard Deviation [SD])                                                                                            | Gender                                                                                                                                                                       | Internal Consistency | Test Re-Test Reliability | Interrater Reliability | Content Validity | Construct Validity | Discriminant/Divergent Validity | Convergent Validity | Predictive Validity | Factor Analysis/Principal Component | Confirmatory Factor Analysis | Structural Equation Modeling | Control/Correlation with Social Desirability | Other Advanced Statistics | Other Biased Responding or Lie Scale | Total Psychometric Assessments |
|--------------------------------------------------------------------------------------|-------------------------------|-------------|---------------------------------------------------------------------------------------------------------------------------------------------------------------------------------------------------------------------------------------------------------------------------|---------------------------------------------------------------------------------------------------------------------------------------------------------|------------------------------------------------------------------------------------------------------------------------------------------------------------------------------|----------------------|--------------------------|------------------------|------------------|--------------------|---------------------------------|---------------------|---------------------|-------------------------------------|------------------------------|------------------------------|----------------------------------------------|---------------------------|--------------------------------------|--------------------------------|
| Empathy Test                                                                         | Layton & Wykle (1990)         | Self-Report |                                                                                                                                                                                                                                                                           |                                                                                                                                                         | Female (88%) Male (12%)                                                                                                                                                      |                      |                          |                        |                  | X                  |                                 |                     |                     |                                     |                              |                              |                                              |                           |                                      | 1                              |
| Empathy Towards People with Intellectual Disabilities Questionnaire (EMP-ID)         | Collins et al. (2017)         | Self-Report | 194 employed carers                                                                                                                                                                                                                                                       |                                                                                                                                                         | Female (74%) Male (26%)                                                                                                                                                      | X                    | X                        |                        | X                | X                  |                                 |                     | X                   |                                     |                              |                              | X                                            |                           |                                      | 6                              |
| English Youth Self-Report Version of the ICU Equanimity Barriers Scale (EDS)         | Hitti et al. (2021)           | Self-Report | 265 middle schoolers                                                                                                                                                                                                                                                      |                                                                                                                                                         | 11-15 female (52%)                                                                                                                                                           | X                    |                          | X                      | X                | X                  | X                               | X                   |                     |                                     |                              |                              |                                              | X                         |                                      | 5                              |
|                                                                                      |                               |             |                                                                                                                                                                                                                                                                           |                                                                                                                                                         |                                                                                                                                                                              | X                    |                          | X                      | X                | X                  | X                               | X                   |                     | X                                   | X                            |                              |                                              |                           |                                      | 8                              |
|                                                                                      | Weber & Lowe (2021)           | Self-Report | study 1 = 453 students and staff; study 2 = 108 undergraduate students; study 3 = 302 undergraduate students                                                                                                                                                              | study 1: M=30.55, SD=11.26; study 2: M=28.79, SD=10.58; study 3: M=30.24, SD=9.52                                                                       | study 1: 20.2% male, 79.1% female; study 2: 32.4% male, 64.8% female; study 3: 21.2% male, 77.7% female                                                                      | X                    |                          |                        | X                | X                  | X                               | X                   |                     | X                                   | X                            |                              |                                              |                           |                                      | 7                              |
|                                                                                      | Weber & Lowe (2018)           | Self-Report | 453 undergraduate health and psychology students and online social media respondents (Study 1), 108 undergraduate health students (Study 2), 302 undergraduate health and psychology students (Study 3) (N=863)                                                           |                                                                                                                                                         | S1: Female (79.1%) Male (20.2%)<br>Unspecified (0.7%)<br>S2: Female (64.8%) Male (32.4%)<br>Unspecified (2.8%)<br>S3: Female (77.8%) Male (21.2%) Gender fluid (1%)          | X                    |                          |                        |                  | X                  | X                               | X                   |                     | X                                   | X                            |                              |                                              |                           |                                      | 6                              |
| Ethical Wills Assessment                                                             | Cohen-Mansfield et al. (2009) | Self-Report | 15 nursing home residents, 11 student volunteers at nursing homes (N=26)                                                                                                                                                                                                  |                                                                                                                                                         | Female (59%) Male (41%)                                                                                                                                                      |                      |                          |                        | X                |                    |                                 |                     |                     |                                     |                              |                              |                                              |                           |                                      | 1                              |
| Ethnic Minority Patient-3 (EMP-3)                                                    | De Maesschaek et al. (2010)   | Self-Report | 112 family physicians                                                                                                                                                                                                                                                     |                                                                                                                                                         | Female (36.6%) Male (60.7%) Did not respond (2.7%)                                                                                                                           | X                    |                          |                        | X                | X                  |                                 |                     |                     | X                                   |                              |                              |                                              |                           |                                      | 4                              |
| Evaluating Goelman's Five Dimensions of Emotional Intelligence [unnamed]             | Branscum et al. (2013)        | Self-Report | 189 undergraduate students                                                                                                                                                                                                                                                |                                                                                                                                                         | Female (49.7%) Male (50.3%)                                                                                                                                                  | X                    |                          |                        | X                | X                  | X                               | X                   | X                   |                                     | X                            |                              |                                              |                           |                                      | 7                              |
| Everyday Multicultural Competencies/Revised Scale of Ethnocultural Empathy (EMCRSEE) | Mallinckrodt et al. (2014)    | Self-Report | 28 key campus administrators responsible for diversity programming, residence hall peer counselors, and counseling psychology doctoral students involved in undergraduate teaching (Development Study), 1278 undergraduate psychology students (Validation Study) (N=130) |                                                                                                                                                         | N/a                                                                                                                                                                          | X                    |                          |                        |                  |                    | X                               |                     |                     |                                     | X                            |                              |                                              |                           |                                      | 4                              |
| Evidence-Based Practice Profile (EBP2) Questionnaire                                 | McEvoy et al. (2010)          | Self-Report | 526 students and academics (Development Sample), 105 allied health students and professionals (Validation Sample) (N=631)                                                                                                                                                 |                                                                                                                                                         | Female (66.7%) Male (33.3%)                                                                                                                                                  | X                    | X                        |                        |                  |                    | X                               | X                   |                     | X                                   |                              |                              |                                              | X                         |                                      | 6                              |
| Executive Function Index (EFI)                                                       | Spinella (2005)               | Self-Report | 188 adults                                                                                                                                                                                                                                                                |                                                                                                                                                         | Female (57%) Male (43%)                                                                                                                                                      | X                    |                          |                        |                  | X                  | X                               | X                   |                     | X                                   |                              |                              |                                              |                           |                                      | 5                              |
| Experience Sampling Method (ESM)                                                     | Runyan et al. (2019)          | Self-Report | 200 adults                                                                                                                                                                                                                                                                |                                                                                                                                                         | Female (65.7%) Male (34.3%)                                                                                                                                                  | X                    |                          |                        |                  |                    |                                 | X                   | X                   |                                     |                              |                              |                                              |                           |                                      | 3                              |
| Eysenck Personality Inventory (EPI)                                                  | Kentle (1995)                 | Self-Report | 300 undergraduate students                                                                                                                                                                                                                                                | M = 21.14, SD = 2.8                                                                                                                                     | Female (50%) Male (50%)                                                                                                                                                      |                      |                          |                        |                  |                    | X                               |                     |                     |                                     |                              |                              |                                              |                           |                                      | 1                              |
| Eysenck Personality Questionnaire - Revised (EPQ-R)                                  | Corulia (1987)                | Self-Report | 307 undergraduate students                                                                                                                                                                                                                                                |                                                                                                                                                         | Female (70%) Male (30%)                                                                                                                                                      | X                    |                          |                        | X                | X                  |                                 | X                   |                     |                                     |                              |                              |                                              |                           | X                                    | 5                              |
| Facets of Emotional Experiences in Everyday Life Scale (FEELS)                       | Chung et al. (2022)           | Self-Report | study 1: 55 participants; study 2: 107 participants; study 3: 229 participants                                                                                                                                                                                            | study 1: M=34.909, SD=6.68; study 2: M=36.810, SD =10.609; study 3: M=36.486, SD: 10.353                                                                | study 1: 51% males, 49% females; study 2: 51% males, 49% females, 40% males, 58% females, 5% genderqueer/gender fluid, 5% trans x man, 5% trans x woman, 5% "rather not say" | X                    |                          |                        | X                | X                  | X                               |                     | X                   | X                                   | X                            |                              |                                              |                           |                                      | 8                              |
| Facilitative Interpersonal Skills for Child Therapy (FIS-C)                          | Bate & Taakas (2022)          | Self-Report | 10 mental health clinicians, either licensed or in training                                                                                                                                                                                                               | M = 29.5, SD = 8.07                                                                                                                                     | 9 female, 1 male                                                                                                                                                             | X                    |                          | X                      | X                | X                  |                                 | X                   |                     |                                     |                              |                              |                                              |                           |                                      | 5                              |
| Family Nurse Caring Belief Scale (FNCBS)                                             | Magri (2018)                  | Self-Report | 213 nurses                                                                                                                                                                                                                                                                |                                                                                                                                                         | Female (98.6%) Male (1.4%)                                                                                                                                                   | X                    |                          |                        | X                | X                  | X                               | X                   |                     | X                                   | X                            |                              |                                              |                           |                                      | 5                              |
| Family Response Questionnaire (FRQ)                                                  | Cordingley et al. (2001)      | Self-Report | 78 close relatives, partners, or friends currently living with a person with CFS                                                                                                                                                                                          |                                                                                                                                                         | Female (59%) Male (41%)                                                                                                                                                      | X                    | X                        |                        | X                | X                  |                                 |                     |                     |                                     |                              |                              |                                              | X                         |                                      | 6                              |
| Fat Attitudes Assessment Toolkit (FAAT)                                              | Cain et al. (2022)            | Self-Report | study 1: 751 American adults (at least 18 years old); study 2: 390 American adults                                                                                                                                                                                        | study 1: median age 38.2; study two average age 31.47                                                                                                   | study 1: 369 women, 378 men, 4 other; study 2: 195 men and women                                                                                                             | X                    | X                        |                        | X                | X                  | X                               | X                   |                     | X                                   | X                            |                              | X                                            |                           |                                      | 9                              |
| Fears of Compassion for Self Scale                                                   | Geller et al. (2019)          | Self-Report | 281 Canadian patients referred for eating disorder treatment (Clinical Sample), 314 Canadian female undergraduate psychology students (Student Sample) (N=595)                                                                                                            |                                                                                                                                                         | Female (98.5%) Male (1%) Other (0.3%)                                                                                                                                        | X                    |                          |                        |                  |                    |                                 |                     | X                   |                                     | X                            |                              |                                              |                           |                                      | 2                              |
| Fears of Compassion in Sport Scale (FCSS)                                            | Zhang & McEwan (2023)         | Self-Report | 792 athletes                                                                                                                                                                                                                                                              | study 1 (sample 1: M=27.75, SD=8.94; sample 2: M=24.28, SD=7.79); study 2 M=22.87, SD=2.33                                                              | study 1 (sample 1: 167 male, sample 2: 131 male); study 2: 78 male                                                                                                           | X                    | X                        |                        | X                | X                  | X                               | X                   | X                   | X                                   | X                            |                              |                                              |                           |                                      | 9                              |
| Fears of Compassion Scales                                                           | Gilbert et al. (2011)         | Self-Report | 222 undergraduate students, 59 therapists attending a three-day Compassion-Focused Therapy workshop (N=281)                                                                                                                                                               |                                                                                                                                                         | Female (77%) Male (23%)                                                                                                                                                      | X                    |                          |                        | X                | X                  | X                               | X                   |                     | X                                   |                              |                              |                                              |                           |                                      | 6                              |
| Fieley's Compassion Fatigue Scale - Revised                                          | Adams et al. (2006)           | Self-Report | 236 social workers                                                                                                                                                                                                                                                        |                                                                                                                                                         | Female (80%) Male (20%)                                                                                                                                                      | X                    |                          |                        |                  | X                  |                                 | X                   |                     | X                                   | X                            |                              |                                              |                           |                                      | 3                              |
| Five Facet Mindfulness Questionnaire (FFMQ)                                          |                               |             |                                                                                                                                                                                                                                                                           |                                                                                                                                                         |                                                                                                                                                                              |                      |                          |                        |                  | X                  |                                 | X                   |                     | X                                   | X                            |                              |                                              |                           |                                      | 5                              |
| Five-Factor Narcissism Inventory - Short Form (FFNI-SF)                              | Sherman et al. (2015)         | Self-Report | 166 undergraduate psychology students (Sample 1), 288 undergraduate students (Sample 2), 287 adults recruited through MTurk (Sample 3), 98 adults currently receiving psychological/psychiatric treatment (Sample 4) (N=839)                                              |                                                                                                                                                         | Female (64.6%) Male (35.4%)                                                                                                                                                  |                      |                          |                        |                  |                    |                                 |                     |                     | X                                   |                              |                              |                                              | X                         |                                      | 2                              |
| Forms of Responding to Self-Critical Thoughts Scale (FoREST)                         | White et al. (2020)           | Self-Report | 254 adults (Study 1), 110 adults (Study 2) (N=364)                                                                                                                                                                                                                        | Study 1: M = 31; Study 2: M = 21.6                                                                                                                      | Female (69.5%) Male (29.7%) Other (.8%)                                                                                                                                      | X                    |                          |                        | X                | X                  |                                 | X                   | X                   | X                                   | X                            |                              | X                                            |                           |                                      | 6                              |
| Four-Dimensional Connectedness Scale (4DCCS)                                         | Huyhn et al. (2012)           | Self-Report | 463 Australian volunteer rural ambulance officers                                                                                                                                                                                                                         |                                                                                                                                                         | Female (51%) Male (49%)                                                                                                                                                      | X                    |                          |                        | X                | X                  | X                               | X                   | X                   | X                                   | X                            |                              |                                              |                           |                                      | 5                              |
| Four-Item Mentalising Index                                                          | Clutterbuck et al. (2021)     | Self-Report | study 1: 689 English-speaking participants; study 2a: 1999 English-speaking adults; study 2b: 116 students; study 3a: 500 English-speaking participants; study 3b: 102 adults with a confirmed clinical diagnosis of autism & 183 non-autistic individuals                | study 1b: M=36.39, SD=12.14; study 2a: M=35.77, SD=12.82; study 2b: range 19-20; participants; study 3b: M=37.29, SD=11.74; study 3c: M=41.74, SD=12.15 | study 1b: 342 females, study 2a: 1286 females; study 2b: 93 females; study 3a: 254 females; study 3b: 62 females                                                             | X                    | X                        |                        | X                | X                  | X                               | X                   | X                   | X                                   | X                            | X                            |                                              |                           |                                      | 10                             |
| General Anesthesia Satisfaction Questionnaire                                        | Hawkins et al. (2014)         | Self-Report | 125 military persons                                                                                                                                                                                                                                                      |                                                                                                                                                         | Female (49.6%) Male (49.6%) Others (0.8%)                                                                                                                                    | X                    | X                        |                        | X                | X                  | X                               | X                   |                     | X                                   |                              | X                            |                                              |                           |                                      | 1                              |
| Genuine Happiness Scale (GHS)                                                        | Rundel et al. (2023)          | Self-Report | 679 undergraduate students                                                                                                                                                                                                                                                | M=20.23, SD=2.33                                                                                                                                        | N/a                                                                                                                                                                          | X                    | X                        |                        | X                | X                  | X                               | X                   | X                   | X                                   | X                            |                              |                                              |                           |                                      | 10                             |
| Global Rating Form for ACGME                                                         | Siber et al. (2004)           | Self-Report | 1295 medical residents                                                                                                                                                                                                                                                    |                                                                                                                                                         | N/a                                                                                                                                                                          | X                    |                          |                        | X                | X                  |                                 |                     |                     | X                                   |                              |                              |                                              | X                         |                                      | 3                              |
| Grid Measure of Empathy [unnamed]                                                    | Smail (1972)                  | Self-Report | 6 patients in group therapy, 1 therapist (N=7)                                                                                                                                                                                                                            | R: 22-37, M = 29                                                                                                                                        | Female (85.7%) Male (14.3%)                                                                                                                                                  |                      |                          |                        |                  | X                  |                                 | X                   |                     |                                     |                              |                              |                                              |                           |                                      | 2                              |
| Groningen Reflection Ability Scale (GRAS)                                            | Aukes et al. (2007)           | Self-Report | 538 medical students and medical teachers (Study 1), 1029 medical students and medical teachers (Study 2) (N=1567)                                                                                                                                                        |                                                                                                                                                         | N/a                                                                                                                                                                          | X                    |                          |                        | X                |                    |                                 |                     |                     | X                                   |                              |                              |                                              |                           |                                      | 3                              |
| Group-Analysis-Empathy 1 (GA-Em1)                                                    | Pavlovic & Vlastelica (2008)  | Self-Report |                                                                                                                                                                                                                                                                           |                                                                                                                                                         | Female (59%) Male (41%)                                                                                                                                                      | X                    |                          |                        | X                | X                  |                                 |                     |                     | X                                   |                              |                              |                                              | X                         |                                      | 5                              |
| Group-Analysis-Empathy 2 (GA-Em2)                                                    | Pavlovic & Vlastelica (2006)  | Self-Report |                                                                                                                                                                                                                                                                           |                                                                                                                                                         | Female (59%) Male (41%)                                                                                                                                                      | X                    |                          |                        | X                | X                  |                                 |                     |                     | X                                   |                              |                              |                                              | X                         |                                      | 5                              |
| Group Questionnaire (GQ)                                                             | Thayer (2014)                 | Self-Report | 290 patients in group psychological treatment                                                                                                                                                                                                                             |                                                                                                                                                         | Female (49%) Male (51%)                                                                                                                                                      | X                    |                          |                        | X                | X                  |                                 | X                   |                     |                                     | X                            |                              |                                              |                           |                                      | 5                              |
| Hate Crime Beliefs Scale (HCBS)                                                      |                               | Self-Report |                                                                                                                                                                                                                                                                           |                                                                                                                                                         |                                                                                                                                                                              | X                    |                          |                        |                  |                    |                                 | X                   |                     | X                                   | X                            |                              |                                              |                           |                                      | 4                              |
|                                                                                      | Kehn et al. (2022)            | Self-Report | 463 general adult population                                                                                                                                                                                                                                              | age = 25.55 average                                                                                                                                     | 340 female                                                                                                                                                                   | X                    |                          |                        |                  |                    |                                 | X                   |                     | X                                   | X                            |                              |                                              |                           |                                      | 4                              |

| Instrument                                                                   | Reference                    | Study Type  | Study Population                                                                                                                                                                                                                             | Age (range [R] and/or Mean [M] with Standard Deviation [SD])              | Gender                                                                                                                                      | Internal Consistency | Test Re-Test Reliability | Interrater Reliability | Content Validity | Construct Validity | Discriminant/Divergent Validity | Convergent Validity | Predictive Validity | Factor Analysis/Principal Component | Confirmatory Factor Analysis | Structural Equation Modeling | Control/Correlation with Social Desirability | Other Advanced Statistics | Other Based Responding or Lie Scale | Total Psychometric Assessments |
|------------------------------------------------------------------------------|------------------------------|-------------|----------------------------------------------------------------------------------------------------------------------------------------------------------------------------------------------------------------------------------------------|---------------------------------------------------------------------------|---------------------------------------------------------------------------------------------------------------------------------------------|----------------------|--------------------------|------------------------|------------------|--------------------|---------------------------------|---------------------|---------------------|-------------------------------------|------------------------------|------------------------------|----------------------------------------------|---------------------------|-------------------------------------|--------------------------------|
|                                                                              | Bacon et al. (2020)          | Self-Report | 438 undergraduate students                                                                                                                                                                                                                   |                                                                           | Female (82%) Male (18%)                                                                                                                     | X                    |                          |                        |                  |                    |                                 |                     |                     | X                                   | X                            |                              |                                              |                           |                                     | 3                              |
| Hate Crime Beliefs Scale - UK (HCBS-UK)                                      | Bacon et al. (2021)          | Self-Report | study 1: 438 undergraduate students<br>study 2: 134 general public                                                                                                                                                                           | study 1: 20.79 mean age, SD = 4.14<br>study 2: 36.44 mean age, SD = 11.32 | study 1: 186 female, 22 male; 3 non binary, 1 transgender<br>study 2: 102 female, 29 male; 3 gender fluid                                   |                      |                          |                        | X                |                    |                                 |                     |                     |                                     |                              |                              | X                                            |                           |                                     | 2                              |
| Health Care Providers Confidence in FGM/C Care                               | Marea et al. (2021)          | Self-Report | 534 health care providers                                                                                                                                                                                                                    | not indicated                                                             | not indicated                                                                                                                               | X                    |                          |                        | X                | X                  | X                               | X                   |                     | X                                   |                              |                              |                                              |                           |                                     | 6                              |
| Health Communication Assessment Tool (HCAT)                                  | Campbell et al. (2013)       | Self-Report | 350 nursing students                                                                                                                                                                                                                         |                                                                           | Female (90%) Male (10%)                                                                                                                     | X                    |                          | X                      |                  |                    |                                 |                     |                     | X                                   |                              |                              |                                              |                           |                                     | 3                              |
| Hogan Empathy Scale (HES)                                                    |                              |             |                                                                                                                                                                                                                                              |                                                                           |                                                                                                                                             | X                    | X                        | X                      |                  | X                  | X                               | X                   | X                   | X                                   |                              |                              |                                              |                           |                                     | 8                              |
|                                                                              | Stoic et al. (2022)          | Self-Report | 183 undergraduates                                                                                                                                                                                                                           | M=22.1, SD = 4.79                                                         | 69 male, 113 female                                                                                                                         | X                    |                          |                        | X                | X                  | X                               | X                   | X                   | X                                   |                              |                              |                                              |                           |                                     | 4                              |
|                                                                              | Froman & Pelouin (2001)      | Self-Report | 320 therapy students                                                                                                                                                                                                                         |                                                                           | Female (59%) Male (15%) Other (25%)                                                                                                         | X                    | X                        |                        |                  | X                  | X                               | X                   |                     | X                                   |                              |                              |                                              |                           |                                     | 6                              |
|                                                                              | Hornblow et al. (1977)       | Self-Report | 30 Australian medical students                                                                                                                                                                                                               |                                                                           | Female (33.3%) Male (66.7%)                                                                                                                 |                      |                          | X                      |                  |                    |                                 |                     | X                   |                                     |                              |                              |                                              |                           |                                     | 2                              |
|                                                                              | Wallston & Weitz (1975)      | Self-Report | 56 undergraduate counseling students                                                                                                                                                                                                         | mean = 28.4                                                               | Female (64.3%) Male (35.7%)                                                                                                                 |                      | X                        |                        |                  | X                  |                                 |                     |                     |                                     |                              |                              |                                              |                           |                                     | 2                              |
| Hospice Volunteer as Patient Advocate (HVPA) Scale                           | Savery & Egbert (2010)       | Self-Report | 136 hospice volunteers                                                                                                                                                                                                                       |                                                                           | Female (80.8%) Male (18.5%) Other (0.7%)                                                                                                    |                      |                          |                        |                  |                    |                                 |                     | X                   |                                     |                              |                              |                                              |                           |                                     | 1                              |
| Hospital Nurse Interpersonal Empathy Questionnaire (HNEQ)                    | Montazeri et al. (2020)      | Self-Report | 250 nurses                                                                                                                                                                                                                                   |                                                                           | Female (80.8%) Male (19.2%)                                                                                                                 | X                    | X                        | X                      | X                | X                  |                                 |                     |                     | X                                   |                              |                              |                                              |                           |                                     | 6                              |
| Huddersfield Service User Pedagogy Scale                                     | Tobbell et al. (2018)        | Self-Report | 365 undergraduate health/social care students                                                                                                                                                                                                |                                                                           | Female (81.9%) Male (18.1%)                                                                                                                 | X                    |                          |                        |                  | X                  |                                 |                     |                     |                                     | X                            |                              |                                              |                           |                                     | 3                              |
| Human Empathetic Listening Test (HELT)                                       | Gray et al. (1976)           | Self-Report | 90 undergraduate students, graduate students, and telephone crisis workers                                                                                                                                                                   |                                                                           | N/A                                                                                                                                         | X                    |                          |                        | X                | X                  |                                 |                     |                     |                                     |                              |                              |                                              |                           |                                     | 3                              |
| Human Factors Skills for Healthcare Instrument - Auxiliary Version (HuFSH-A) | Lavelle et al. (2019)        | Self-Report | 188 non-clinical professionals working in healthcare contexts                                                                                                                                                                                |                                                                           | Female (59%) Male (41%)                                                                                                                     | X                    |                          |                        | X                |                    |                                 |                     |                     | X                                   |                              |                              |                                              | X                         |                                     | 4                              |
| Humanised Care Assessment Tool (HCAT)                                        | Galvin et al. (2018)         | Self-Report | 10 nursing students                                                                                                                                                                                                                          |                                                                           | Female (90%) Male (20%)                                                                                                                     |                      |                          |                        | X                |                    |                                 |                     |                     |                                     |                              |                              |                                              |                           |                                     | 1                              |
| Humanistic Relationship Importance Scale (HRIS)                              | Boscart et al. (2016)        | Self-Report | 249 patients residing in five nursing facilities                                                                                                                                                                                             | patients residing in five nursing facilities                              | Female (57.5%) Male (42.5%)                                                                                                                 | X                    | X                        |                        | X                | X                  |                                 |                     |                     | X                                   |                              |                              |                                              | X                         |                                     | 6                              |
| Illness Invalidation Inventory (3*I)                                         | Kool et al. (2014)           | Self-Report | 6057 patients with rheumatic disease                                                                                                                                                                                                         |                                                                           | Female (88%) Male (12%)                                                                                                                     |                      |                          |                        |                  |                    |                                 |                     |                     |                                     | X                            |                              |                                              |                           |                                     | 1                              |
| Impact of Cancer Scale - Version 2 (IOCv2)                                   | Crespi et al. (2008)         | Self-Report | 1188 early-stage breast cancer survivors                                                                                                                                                                                                     |                                                                           | Female (100%) Male (0%)                                                                                                                     | X                    |                          |                        |                  | X                  | X                               | X                   | X                   | X                                   |                              |                              |                                              | X                         | X                                   | 6                              |
| Implicit Relational Assessment Procedure (IRAP)                              |                              |             |                                                                                                                                                                                                                                              |                                                                           |                                                                                                                                             | X                    |                          |                        |                  |                    |                                 |                     |                     |                                     |                              |                              |                                              | X                         | X                                   | 4                              |
|                                                                              | Bast (2015)                  | Self-Report | 81 Irish undergraduate and postgraduate students                                                                                                                                                                                             |                                                                           | N/A                                                                                                                                         |                      |                          |                        |                  |                    |                                 |                     | X                   |                                     |                              |                              |                                              |                           |                                     | 1                              |
|                                                                              | Bast et al. (2015)           | Self-Report | 26 undergraduate students                                                                                                                                                                                                                    |                                                                           | N/A                                                                                                                                         |                      |                          |                        |                  |                    |                                 |                     | X                   |                                     |                              |                              |                                              | X                         |                                     | 3                              |
| Impulsiveness-Venturesomeness-Empathy Questionnaire [Unnamed]                | Eysenck & Eysenck (1978)     | Self-Report | 1189 adults                                                                                                                                                                                                                                  | M = 24.63, SD = 9.00                                                      | Female (66.2%) Male (33.8%)                                                                                                                 | X                    |                          |                        |                  |                    |                                 | X                   |                     |                                     |                              | X                            |                                              | X                         |                                     | 4                              |
| Index of Empathetic Concern                                                  | Matthews et al. (1981)       | Self-Report | 88 undergraduate students (Validation Sample), 220 twin pairs (Twin Sample, MZ and DZ) (N=548)                                                                                                                                               |                                                                           | Female (0%) Male (100%)                                                                                                                     |                      |                          |                        | X                |                    |                                 | X                   |                     | X                                   |                              |                              |                                              |                           |                                     | 3                              |
| Index of Responding                                                          | Cummings & Murray (1990)     | Self-Report | 70 elementary and secondary teachers                                                                                                                                                                                                         |                                                                           | Female (50%) Male (50%)                                                                                                                     | X                    |                          |                        |                  | X                  |                                 |                     |                     | X                                   |                              |                              |                                              |                           |                                     | 3                              |
| (Inner) Strength-Based Inventory (SBI)                                       | Wongpakaran et al. (2020)    | Self-Report | 556 medical students                                                                                                                                                                                                                         |                                                                           | Female (51.2%) Male (48.8%)                                                                                                                 |                      |                          | X                      |                  |                    |                                 |                     |                     | X                                   |                              |                              |                                              |                           |                                     | 2                              |
| Insanity Defense Attitude - Revised (IDA-R) Scale                            | Adjorlolo et al. (2017)      | Self-Report | 253 undergraduate students                                                                                                                                                                                                                   |                                                                           | Female (56%) Male (44%)                                                                                                                     | X                    |                          |                        |                  | X                  | X                               | X                   | X                   | X                                   | X                            |                              |                                              | X                         |                                     | 7                              |
| Integrity Scale                                                              | Hart et al. (2022)           | Self-Report | 309 students                                                                                                                                                                                                                                 | M=19.01, SD=1.5                                                           | 81.2% female                                                                                                                                | X                    |                          |                        |                  | X                  | X                               | X                   | X                   | X                                   | X                            |                              |                                              |                           |                                     | 5                              |
| Interaction with Disabled Persons Scale (IDP)                                |                              |             |                                                                                                                                                                                                                                              |                                                                           |                                                                                                                                             | X                    |                          |                        |                  | X                  | X                               | X                   | X                   | X                                   | X                            |                              | X                                            |                           |                                     | 7                              |
|                                                                              | Thomas et al. (2003)         | Self-Report | 358 undergraduate students                                                                                                                                                                                                                   | R: 18-55, M = 22.4, SD = 6.2                                              | Female (68.2%) Male (31.8%)                                                                                                                 | X                    |                          |                        |                  | X                  | X                               |                     |                     | X                                   | X                            |                              | X                                            |                           |                                     | 6                              |
|                                                                              | MacLean & Gannon (1995)      | Self-Report | 343 undergraduate students                                                                                                                                                                                                                   | 17-above                                                                  | Female (65%) Male (35%)                                                                                                                     | X                    |                          |                        |                  |                    |                                 | X                   |                     | X                                   |                              |                              |                                              |                           |                                     | 3                              |
|                                                                              |                              |             | 325 undergraduate and postgraduate students (Study 1, PCA), 61 undergraduate and postgraduate students (Study 1, CFA), 194 undergraduate and postgraduate students (Study 2), 170 undergraduate and postgraduate students (Study 3) (N=1270) |                                                                           | study 1: PCA: Female 57.8% male 42.2%; CFA: Female 66.4% male 33.6%<br>study 2: Female 56.2% Male 43.8%<br>study 3: female 63.1% male 36.9% |                      |                          |                        |                  |                    | X                               |                     |                     | X                                   | X                            |                              |                                              |                           |                                     | 3                              |
| Interconnectedness Scale                                                     | Yu et al. (2020)             | Self-Report | 84 American business people working in China                                                                                                                                                                                                 |                                                                           | N/A                                                                                                                                         |                      |                          |                        |                  | X                  |                                 |                     |                     |                                     | X                            |                              |                                              |                           |                                     | 2                              |
| Intercultural Effectiveness Scale (IES)                                      | Cui & Van Den Berg (1991)    | Self-Report | 382 adults (Sample 1), 455 adults (Sample 2) (N=837)                                                                                                                                                                                         |                                                                           | Female (51.6%) Male (48.4%)                                                                                                                 |                      |                          |                        |                  |                    |                                 |                     |                     |                                     | X                            | X                            |                                              | X                         |                                     | 3                              |
| International Personality Item Pool (IPIP)                                   | Miller (2009)                | Self-Report | 450 undergraduate students                                                                                                                                                                                                                   |                                                                           | Female (66%) Male (34%)                                                                                                                     | X                    |                          |                        |                  | X                  |                                 |                     |                     | X                                   | X                            |                              |                                              |                           |                                     | 4                              |
| Interpersonal and Social Empathy Index (ISEI)                                | Segal et al. (2013)          | Self-Report | 579 undergraduate and graduate nursing students                                                                                                                                                                                              |                                                                           | Female (92%) Male (8%)                                                                                                                      | X                    |                          |                        |                  | X                  |                                 |                     |                     | X                                   |                              |                              |                                              |                           |                                     | 3                              |
| Interpersonal Communication Assessment Scale (ICAS)                          | Kiakovich & Dela Cruz (2006) | Self-Report |                                                                                                                                                                                                                                              |                                                                           |                                                                                                                                             | X                    |                          |                        |                  | X                  |                                 |                     |                     | X                                   |                              |                              |                                              | X                         |                                     | 5                              |
| Interpersonal Communication Competence Scale (ICCS)                          |                              |             |                                                                                                                                                                                                                                              |                                                                           |                                                                                                                                             | X                    |                          |                        |                  | X                  |                                 |                     |                     | X                                   |                              |                              |                                              | X                         |                                     | 4                              |
|                                                                              | Hald et al. (2015)           | Self-Report | 17 adults with ABI                                                                                                                                                                                                                           |                                                                           | Female (35%) Male (65%)<br>Female (52%) Male (48%)                                                                                          | X                    |                          |                        |                  | X                  |                                 |                     |                     | X                                   |                              |                              |                                              | X                         |                                     | 2                              |
| Interpersonal Guilt Rating Scale -15 Self-Report (IGRS-15)                   | Rubin & Martin (1994)        | Self-Report | 477 adults                                                                                                                                                                                                                                   |                                                                           | Female (60.7%) Male (39.3%)                                                                                                                 | X                    |                          |                        |                  | X                  |                                 |                     |                     | X                                   | X                            | X                            | X                                            | X                         |                                     | 6                              |
| Interpersonal Reactivity Index (IRI)                                         | Faccini et al. (2020)        | Self-Report | 448 adults                                                                                                                                                                                                                                   | 18 or older                                                               |                                                                                                                                             | X                    | X                        |                        | X                | X                  | X                               | X                   | X                   | X                                   | X                            | X                            | X                                            | X                         | X                                   | 12                             |
|                                                                              |                              |             | 218 undergraduate students who endorsed a high level of schizotypal traits                                                                                                                                                                   |                                                                           | 20.6% male, 79.4% female                                                                                                                    | X                    |                          |                        |                  | X                  |                                 |                     |                     | X                                   | X                            |                              |                                              |                           |                                     | 3                              |
|                                                                              | Bonifla et al. (2022)        | Self-Report | 182 undergraduates                                                                                                                                                                                                                           | M = 19.9 (SD = 3.2)                                                       | 69 male, 113 female                                                                                                                         |                      |                          |                        |                  | X                  | X                               | X                   | X                   | X                                   |                              |                              |                                              |                           |                                     | 4                              |
|                                                                              | Stoic et al. (2022)          | Self-Report |                                                                                                                                                                                                                                              |                                                                           |                                                                                                                                             | X                    |                          |                        |                  | X                  | X                               | X                   | X                   | X                                   |                              |                              |                                              |                           |                                     | 3                              |
|                                                                              | Murphy et al. (2020)         | Self-Report | 100 dental students                                                                                                                                                                                                                          | M=24.45, SD=1.95                                                          | 61 female, 39 male                                                                                                                          | X                    | X                        |                        | X                | X                  |                                 | X                   |                     | X                                   | X                            | X                            |                                              |                           |                                     | 6                              |
|                                                                              | Rajput et al. (2020)         | Self-Report |                                                                                                                                                                                                                                              |                                                                           |                                                                                                                                             | X                    |                          |                        |                  | X                  |                                 |                     |                     | X                                   | X                            |                              |                                              |                           |                                     | 5                              |
|                                                                              | Leinweber et al. (2019)      | Self-Report | 705 midwives                                                                                                                                                                                                                                 |                                                                           | Female (100%) Male (0%)                                                                                                                     | X                    |                          |                        | X                | X                  |                                 |                     |                     | X                                   |                              |                              |                                              |                           |                                     | 5                              |
|                                                                              | Peretti et al. (2019)        | Self-Report |                                                                                                                                                                                                                                              |                                                                           |                                                                                                                                             |                      |                          |                        |                  |                    | X                               | X                   |                     | X                                   |                              |                              |                                              |                           |                                     | 3                              |
|                                                                              | Chryskou & Thompson (2016)   | Self-Report | 417 adults recruited through MTurk                                                                                                                                                                                                           |                                                                           | Female (56.8%) Male (43.2%)                                                                                                                 |                      |                          |                        |                  |                    |                                 |                     |                     |                                     | X                            |                              |                                              | X                         |                                     | 2                              |
|                                                                              |                              |             |                                                                                                                                                                                                                                              |                                                                           | Study 1 - Female (54%) Male (46%)<br>Study 2 - Female (41%) Male (59%)<br>Study 3 - Female (49%) Male (51%)                                 |                      |                          |                        |                  |                    | X                               | X                   |                     |                                     |                              |                              | X                                            |                           |                                     | 3                              |
|                                                                              | Saleem et al. (2015)         | Self-Report | 162 adults (Study 1), 177 adults (Study 2), 146 adults (Study 3) (N=485)                                                                                                                                                                     |                                                                           | Female (18.3%) Male (81.7%)                                                                                                                 | X                    |                          |                        |                  | X                  | X                               | X                   |                     | X                                   | X                            |                              |                                              | X                         |                                     | 6                              |
|                                                                              | Alterman et al. (2003)       | Self-Report | 114 physicians, 95 undergraduate psychology students (N=209)                                                                                                                                                                                 |                                                                           |                                                                                                                                             | X                    |                          |                        |                  | X                  | X                               | X                   |                     | X                                   | X                            |                              |                                              |                           |                                     | 4                              |
|                                                                              | Yarnold et al. (1996)        | Self-Report | 206 undergraduate students                                                                                                                                                                                                                   |                                                                           | N/A                                                                                                                                         |                      | X                        |                        |                  | X                  | X                               |                     |                     | X                                   |                              |                              |                                              |                           |                                     | 1                              |
|                                                                              | Thomson & Thomson (1995)     | Self-Report |                                                                                                                                                                                                                                              |                                                                           | Female (50.5%) Male (49.5%)                                                                                                                 |                      |                          |                        |                  |                    |                                 |                     |                     | X                                   |                              |                              |                                              |                           |                                     | 4                              |
|                                                                              | Gurtman (1992)               | Self-Report | 279 undergraduate students                                                                                                                                                                                                                   |                                                                           | Female (66%) Male (34%)                                                                                                                     |                      |                          |                        | X                | X                  |                                 |                     |                     |                                     |                              |                              |                                              | X                         |                                     | 3                              |



| Instrument                                                                 | Reference                      | Study Type  | Study Population                                                                                                                                                                                                                                                                                                                                                                     | Age (range [R] and/or Mean [M] with Standard Deviation [SD])                      | Gender                                                                                                                                                                  | Internal Consistency | Test Re-Test Reliability | Interrater Reliability | Content Validity | Construct Validity | Discriminant/Divergent Validity | Convergent Validity | Predictive Validity | Factor Analysis/Principal Component | Confirmatory Factor Analysis | Structural Equation Modeling | Control/Correlation with Social Desirability | Other Advanced Statistics | Other Biased or Responding or Lie Scale | Total Psychometric Assessments |
|----------------------------------------------------------------------------|--------------------------------|-------------|--------------------------------------------------------------------------------------------------------------------------------------------------------------------------------------------------------------------------------------------------------------------------------------------------------------------------------------------------------------------------------------|-----------------------------------------------------------------------------------|-------------------------------------------------------------------------------------------------------------------------------------------------------------------------|----------------------|--------------------------|------------------------|------------------|--------------------|---------------------------------|---------------------|---------------------|-------------------------------------|------------------------------|------------------------------|----------------------------------------------|---------------------------|-----------------------------------------|--------------------------------|
| Interpersonal Reactivity Index - Brief Form (B-IRI)                        | Ingolia et al. (2016)          | Self-Report | 1104 Italian adolescents                                                                                                                                                                                                                                                                                                                                                             | R: 14-30                                                                          | Female (62%) Male (38%)                                                                                                                                                 | X                    |                          |                        |                  | X                  |                                 |                     |                     | X                                   | X                            |                              |                                              |                           |                                         | 4                              |
| Interpersonal Regulation Questionnaire (IRQ)                               | Williams et al. (2018)         | Self-Report | 285 undergraduate students (Study 1), 347 undergraduate students (Study 2), 400 undergraduate students (Study 3), 787 undergraduate students (Study 4), 193 undergraduate students (Study 5) (N=2012)                                                                                                                                                                                |                                                                                   | S1: Female (41.4%) Male (58.6%)<br>S2: Female (47.8%) Male (52.2%)<br>S3: Female (41%) Male (59%)<br>S4: Female (46.4%) Male (53.6%)<br>S5: Female (52.3%) Male (47.7%) |                      | X                        |                        |                  | X                  | X                               | X                   | X                   | X                                   | X                            |                              | X                                            |                           |                                         | 8                              |
| Interview Satisfaction Questionnaire (ISQ)                                 | Grayson-Sneed et al. (2016)    | Self-Report | 105 medical residents                                                                                                                                                                                                                                                                                                                                                                |                                                                                   | Female (40%) Male (60%)                                                                                                                                                 | X                    |                          |                        |                  | X                  |                                 | X                   |                     |                                     | X                            |                              |                                              |                           |                                         | 4                              |
| Inventory of Beliefs about Wife Beating (IBWB)                             | Saunders et al. (1987)         | Self-Report | 675 students (Study 1), 1091 adults (undergraduate students, nurses, physicians, men entering treatment for abusing women, women advocates for abused women, and individuals from a separate study on attitudes about woman abuse) (Study 2), 719 adults (undergraduate students, women advocates for abused women, and men entering treatment for abusing women) (Study 3) (N=3485) |                                                                                   | N/A                                                                                                                                                                     | X                    |                          |                        |                  | X                  |                                 | X                   |                     | X                                   |                              |                              | X                                            |                           |                                         | 5                              |
| Inventory of Cross-Cultural Sensitivity (ICCS)                             | Loo & Shimi (1999)             | Self-Report | 273 Japanese undergraduate teaching students (Sample 1), 211 Canadian undergraduate management students (Sample 2) (N=484)                                                                                                                                                                                                                                                           |                                                                                   | Japanese group: Female (69%) Male (31%)<br>Canadian group: Female (42%) Male (58%)                                                                                      | X                    |                          |                        |                  |                    |                                 |                     |                     | X                                   | X                            |                              |                                              |                           |                                         | 3                              |
| Inventory of Motivations for Palliative Care Volunteerism (MPCV)           | Claxton-Oldfield et al. (2011) | Self-Report | 141 undergraduate students (Study 1), 141 hospital palliative care volunteers (Study 2) (N=282)                                                                                                                                                                                                                                                                                      |                                                                                   | Female (80.1%) Male (19.9%)                                                                                                                                             | X                    |                          | X                      |                  | X                  |                                 |                     | X                   |                                     | X                            |                              |                                              |                           |                                         | 5                              |
| Inventory of Personality Organization (IPO)                                | Waugh et al. (2021)            | Self-Report | 27 graduate students and PhD-Level psychologists                                                                                                                                                                                                                                                                                                                                     | M = 29.36, SD = 8.23                                                              | not indicated                                                                                                                                                           |                      |                          | X                      | X                |                    |                                 |                     |                     |                                     |                              |                              |                                              |                           |                                         | 2                              |
| Jefferson Scale of Attitudes toward Physician-Nurse Collaboration (USAPNC) | Ward et al. (2008)             | Self-Report | 333 undergraduate students                                                                                                                                                                                                                                                                                                                                                           |                                                                                   | Female (85%) Male (15%)                                                                                                                                                 | X                    |                          |                        |                  | X                  |                                 |                     |                     | X                                   | X                            | X                            |                                              |                           |                                         | 3                              |
| Jefferson Scale of Empathy (JSE)                                           |                                |             |                                                                                                                                                                                                                                                                                                                                                                                      |                                                                                   |                                                                                                                                                                         | X                    |                          |                        |                  | X                  |                                 |                     |                     | X                                   | X                            | X                            |                                              | X                         |                                         | 6                              |
|                                                                            | Hojat et al. (2018)            | Self-Report | 6009 osteopathic medicine students                                                                                                                                                                                                                                                                                                                                                   |                                                                                   | Female (47%) Male (53%)                                                                                                                                                 | X                    |                          |                        |                  | X                  |                                 |                     |                     | X                                   | X                            | X                            |                                              | X                         |                                         | 6                              |
|                                                                            | Stansfield et al. (2016)       | Self-Report | 4797 medical students                                                                                                                                                                                                                                                                                                                                                                |                                                                                   | Female (49.5%) Male (50.5%)                                                                                                                                             | X                    |                          |                        |                  | X                  |                                 |                     |                     | X                                   | X                            | X                            |                                              |                           |                                         | 4                              |
|                                                                            | Hojat & LaNoue (2014)          | Self-Report | 2612 medical students                                                                                                                                                                                                                                                                                                                                                                |                                                                                   | Female (51%) Male (49%)                                                                                                                                                 | X                    |                          |                        |                  | X                  |                                 |                     |                     | X                                   | X                            | X                            |                                              |                           |                                         | 5                              |
| Jefferson Scale of Empathy - Health Profession Students (JSE-HPS)          |                                |             |                                                                                                                                                                                                                                                                                                                                                                                      |                                                                                   |                                                                                                                                                                         | X                    |                          | X                      |                  | X                  |                                 |                     |                     | X                                   | X                            | X                            |                                              |                           |                                         | 6                              |
|                                                                            | Shekawat et al. (2017)         | Self-Report | 150 undergraduate students, interns, and postgraduate students                                                                                                                                                                                                                                                                                                                       |                                                                                   | N/A                                                                                                                                                                     |                      |                          | X                      |                  | X                  |                                 |                     |                     | X                                   |                              |                              |                                              |                           |                                         | 3                              |
|                                                                            | Williams et al. (2013a)        | Self-Report | 330 undergraduate paramedic students                                                                                                                                                                                                                                                                                                                                                 |                                                                                   | Female (65.2%) Male (34.8%)                                                                                                                                             | X                    |                          |                        |                  | X                  |                                 |                     |                     | X                                   | X                            |                              |                                              |                           |                                         | 4                              |
|                                                                            | Fjortoft et al. (2011)         | Self-Report | 187 pharmacy students                                                                                                                                                                                                                                                                                                                                                                |                                                                                   | N/A                                                                                                                                                                     | X                    |                          |                        |                  | X                  |                                 |                     |                     |                                     |                              | X                            |                                              |                           |                                         | 3                              |
| Jefferson Scale of Empathy - Law Students (JSE-LS)                         |                                |             |                                                                                                                                                                                                                                                                                                                                                                                      |                                                                                   |                                                                                                                                                                         | X                    |                          |                        |                  | X                  |                                 |                     |                     | X                                   |                              |                              |                                              |                           |                                         | 3                              |
|                                                                            | Spivak et al. (2016)           | Self-Report | 3072 undergraduate law students                                                                                                                                                                                                                                                                                                                                                      | M = 21.14, SD = 2.8                                                               | Female (72.8%) Male (27.2%)                                                                                                                                             | X                    |                          |                        |                  | X                  |                                 |                     |                     | X                                   |                              |                              |                                              |                           |                                         | 3                              |
|                                                                            | Williams et al. (2016a)        | Self-Report | 275 undergraduate law students                                                                                                                                                                                                                                                                                                                                                       |                                                                                   | Females (66.9%) Males (33.1%)                                                                                                                                           | X                    |                          |                        |                  | X                  |                                 |                     |                     | X                                   |                              |                              |                                              |                           |                                         | 3                              |
| Jefferson Scale of Empathy - Medical Student Version (JSE-MS)              | Hojat & Gonnella (2015)        | Self-Report | 2637 medical students                                                                                                                                                                                                                                                                                                                                                                |                                                                                   | Female (51%) Male (49%)                                                                                                                                                 | X                    |                          |                        | X                |                    |                                 |                     |                     | X                                   |                              |                              |                                              |                           |                                         | 2                              |
| Jefferson Scale of Patient's Perception of Physician Empathy (JSPPE)       |                                |             |                                                                                                                                                                                                                                                                                                                                                                                      |                                                                                   |                                                                                                                                                                         | X                    |                          |                        |                  |                    | X                               |                     |                     | X                                   |                              |                              |                                              |                           |                                         | 4                              |
|                                                                            | Keulen et al. (2020)           | Self-Report | 84 orthopedic patients                                                                                                                                                                                                                                                                                                                                                               | 20-88                                                                             | 44 female                                                                                                                                                               | X                    |                          |                        |                  |                    | X                               |                     |                     | X                                   |                              |                              |                                              |                           |                                         | 2                              |
|                                                                            | Glaser et al. (2007)           | Self-Report | 225 internal medicine patients                                                                                                                                                                                                                                                                                                                                                       |                                                                                   | Female (64%) Male (36%)                                                                                                                                                 | X                    |                          |                        |                  |                    | X                               |                     |                     | X                                   |                              |                              |                                              |                           |                                         | 2                              |
|                                                                            | Kane et al. (2007)             | Self-Report | 225 internal medicine patients                                                                                                                                                                                                                                                                                                                                                       |                                                                                   | N/A                                                                                                                                                                     | X                    |                          |                        |                  |                    | X                               |                     |                     | X                                   |                              |                              |                                              |                           |                                         | 2                              |
| Jefferson Scale of Physician Empathy (JSPE)                                |                                |             |                                                                                                                                                                                                                                                                                                                                                                                      |                                                                                   |                                                                                                                                                                         | X                    | X                        |                        | X                | X                  | X                               | X                   | X                   | X                                   | X                            | X                            |                                              | X                         |                                         | 10                             |
|                                                                            | Osim et al. (2019)             | Self-Report | 120 Nigerian doctors                                                                                                                                                                                                                                                                                                                                                                 |                                                                                   | Female (41.7%) Male (58.3%)                                                                                                                                             | X                    |                          |                        |                  | X                  |                                 |                     | X                   | X                                   |                              |                              |                                              |                           |                                         | 4                              |
|                                                                            | Aggarwal et al. (2016)         | Self-Report | 978 Indian dental students                                                                                                                                                                                                                                                                                                                                                           | M = 50, SD = 16.57                                                                | Female (68.4%) Male (31.6%)                                                                                                                                             | X                    |                          |                        |                  | X                  |                                 |                     |                     | X                                   |                              | X                            |                                              |                           |                                         | 2                              |
|                                                                            | Spasenka et al. (2016)         | Self-Report | 193 Malaysian medical students                                                                                                                                                                                                                                                                                                                                                       |                                                                                   | N/A                                                                                                                                                                     | X                    |                          |                        |                  | X                  |                                 |                     |                     | X                                   |                              |                              |                                              | X                         |                                         | 4                              |
|                                                                            | O'Connor et al. (2014)         | Self-Report | 163 final-year medical students                                                                                                                                                                                                                                                                                                                                                      |                                                                                   | Female (53.4%) Male (46.6%)                                                                                                                                             |                      |                          | X                      | X                |                    |                                 |                     |                     |                                     |                              |                              |                                              |                           |                                         | 2                              |
|                                                                            | Tavakoli et al. (2011)         | Self-Report | 853 medical students in the UK                                                                                                                                                                                                                                                                                                                                                       |                                                                                   | Female (55%) Male (45%)                                                                                                                                                 | X                    |                          |                        |                  |                    |                                 |                     |                     | X                                   | X                            | X                            |                                              |                           |                                         | 4                              |
|                                                                            | Ward et al. (2009)             | Self-Report | 333 undergraduate students                                                                                                                                                                                                                                                                                                                                                           |                                                                                   | Female (85%) Male (15%)                                                                                                                                                 | X                    |                          |                        |                  | X                  |                                 |                     |                     | X                                   |                              |                              |                                              |                           |                                         | 4                              |
|                                                                            | Glaser (2007)                  | Self-Report | 130 dental students                                                                                                                                                                                                                                                                                                                                                                  |                                                                                   | Female (64%) Male (36%)                                                                                                                                                 | X                    |                          |                        |                  |                    | X                               |                     |                     | X                                   |                              |                              |                                              |                           |                                         | 2                              |
|                                                                            | Sherman & Cramer (2005)        | Self-Report | 130 dental students                                                                                                                                                                                                                                                                                                                                                                  |                                                                                   | Female (34.6%) Male (65%)                                                                                                                                               | X                    |                          |                        |                  | X                  | X                               | X                   |                     | X                                   |                              |                              |                                              |                           |                                         | 5                              |
|                                                                            | Hojat et al. (2002a)           | Self-Report | 704 physicians                                                                                                                                                                                                                                                                                                                                                                       |                                                                                   | Female (26%) Male (74%)                                                                                                                                                 | X                    | X                        |                        | X                | X                  |                                 |                     |                     | X                                   |                              |                              |                                              |                           |                                         | 2                              |
|                                                                            | Hojat et al. (2002b)           | Self-Report | 704 physicians                                                                                                                                                                                                                                                                                                                                                                       |                                                                                   | N/A                                                                                                                                                                     | X                    | X                        |                        | X                | X                  |                                 |                     |                     | X                                   |                              |                              |                                              |                           |                                         | 4                              |
|                                                                            | Hojat et al. (2001)            | Self-Report | 193 physicians, medical residents, and medical students                                                                                                                                                                                                                                                                                                                              |                                                                                   | Female (40%) Male (60%)                                                                                                                                                 | X                    | X                        |                        | X                | X                  |                                 |                     |                     | X                                   | X                            |                              |                                              |                           |                                         | 4                              |
| Kiersma-Chen Empathy Scale (KCES)                                          |                                |             |                                                                                                                                                                                                                                                                                                                                                                                      |                                                                                   |                                                                                                                                                                         | X                    | X                        |                        | X                | X                  |                                 |                     |                     | X                                   | X                            |                              |                                              |                           |                                         | 6                              |
|                                                                            | Aronson et al. (2022)          | Self-Report | 7712 student pharmacists, student nurses, physical therapy students, nurses, and physicians                                                                                                                                                                                                                                                                                          | NA                                                                                | NA                                                                                                                                                                      | X                    | X                        |                        | X                | X                  |                                 |                     |                     | X                                   | X                            |                              |                                              |                           |                                         | 5                              |
|                                                                            | Kiersma et al. (2013)          | Self-Report | 216 pharmacy and nursing students                                                                                                                                                                                                                                                                                                                                                    |                                                                                   | Female (100%) Male (0%)                                                                                                                                                 | X                    |                          |                        |                  | X                  |                                 |                     |                     | X                                   | X                            |                              |                                              |                           |                                         | 4                              |
| Kiersma-Chen Empathy Scale Revised Version (KCES-R)                        | Blakely et al. (2022)          | Self-Report | 94 second-year student pharmacists                                                                                                                                                                                                                                                                                                                                                   | not indicated                                                                     | 38% male                                                                                                                                                                | X                    | X                        | X                      | X                | X                  |                                 |                     |                     | X                                   |                              |                              |                                              |                           |                                         | 6                              |
| Kindness Scale                                                             | Youngs et al. (2021)           | Self-Report | 1039 adults                                                                                                                                                                                                                                                                                                                                                                          | M = 50, SD = 16.57<br>wave 1: Mean child age = 7.8, wave 2: mean child age = 15.7 | 50% male, 50% female                                                                                                                                                    | X                    |                          |                        | X                | X                  | X                               | X                   | X                   | X                                   | X                            |                              |                                              |                           |                                         | 7                              |
| Kirk Adoption Questionnaire (KAQ)                                          | Lo et al. (2021)               | Self-Report | 190 adoptive mothers                                                                                                                                                                                                                                                                                                                                                                 |                                                                                   | 100% mothers                                                                                                                                                            | X                    |                          | X                      |                  |                    | X                               |                     |                     | X                                   | X                            |                              |                                              |                           |                                         | 5                              |
| Knee Osteoarthritis Expectations Questionnaire                             | Benhamou et al. (2013)         | Self-Report | 10 experts (Development Study), 524 knee osteoarthritis patients (Validation Study) (N=534)                                                                                                                                                                                                                                                                                          | Phase 2: M = 68.2                                                                 |                                                                                                                                                                         | X                    | X                        |                        | X                | X                  | X                               | X                   | X                   | X                                   |                              | X                            |                                              |                           |                                         | 7                              |
| Leeds Satisfaction Questionnaire                                           | Hill et al. (1992)             | Self-Report | 70 patients with rheumatology arthritis                                                                                                                                                                                                                                                                                                                                              |                                                                                   | N/A                                                                                                                                                                     | X                    | X                        |                        | X                |                    |                                 |                     |                     | X                                   |                              | X                            |                                              |                           |                                         | 3                              |
| Level of Personality Functioning Scale (LPFS)                              | Morey (2017)                   | Self-Report | 306 adults                                                                                                                                                                                                                                                                                                                                                                           |                                                                                   | Female (43%) Male (57%)                                                                                                                                                 | X                    |                          |                        |                  | X                  |                                 |                     |                     |                                     |                              |                              |                                              |                           |                                         | 2                              |
| Level of Personality Functioning Scale - Brief Form 2.0 (LPFS-BF 2.0)      | Waugh et al. (2021)            | Self-Report | 23 graduate students and PhD-Level psychologists                                                                                                                                                                                                                                                                                                                                     | M = 29.36, SD = 8.23                                                              | not indicated                                                                                                                                                           |                      |                          | X                      | X                |                    |                                 |                     |                     |                                     |                              |                              |                                              |                           |                                         | 2                              |
| Level of Personality Functioning Scale - Self Report (LPFS-SR)             |                                |             |                                                                                                                                                                                                                                                                                                                                                                                      |                                                                                   |                                                                                                                                                                         | X                    | X                        | X                      | X                | X                  | X                               | X                   | X                   | X                                   |                              |                              |                                              |                           |                                         | 8                              |
|                                                                            | Waugh et al. (2021)            | Self-Report | 30 graduate students and PhD-Level psychologists                                                                                                                                                                                                                                                                                                                                     | M = 29.36, SD = 8.23                                                              | not indicated                                                                                                                                                           |                      |                          | X                      | X                |                    |                                 |                     |                     |                                     |                              |                              |                                              |                           |                                         | 2                              |
|                                                                            | Hopwood et al. (2018)          | Self-Report | 1976 adults recruited through MTurk                                                                                                                                                                                                                                                                                                                                                  |                                                                                   | Female (46.4%) Male (53.6%)                                                                                                                                             |                      | X                        |                        |                  | X                  | X                               | X                   | X                   | X                                   |                              |                              |                                              |                           |                                         | 5                              |

| Instrument                                                     | Reference                                  | Study Type  | Study Population                                                                                                                                                                                                                                                                                      | Age (range [R] and/or Mean [M] with Standard Deviation [SD]) | Gender                                                                                                                  | Internal Consistency | Test Re-Test Reliability | Interrater Reliability | Content Validity | Construct Validity | Discriminant/Divergent Validity | Convergent Validity | Predictive Validity | Factor Analysis/Principal Component | Confirmatory Factor Analysis | Structural Equation Modeling | Control/Correlation with Social Desirability | Other Advanced Statistics | Other Biased Responding or Lie Scale | Total Psychometric Assessments |   |
|----------------------------------------------------------------|--------------------------------------------|-------------|-------------------------------------------------------------------------------------------------------------------------------------------------------------------------------------------------------------------------------------------------------------------------------------------------------|--------------------------------------------------------------|-------------------------------------------------------------------------------------------------------------------------|----------------------|--------------------------|------------------------|------------------|--------------------|---------------------------------|---------------------|---------------------|-------------------------------------|------------------------------|------------------------------|----------------------------------------------|---------------------------|--------------------------------------|--------------------------------|---|
| Levenson Self-Report Psychopathy Scale                         | Salekin et al. (2014)                      | Self-Report | 1257 undergraduate students                                                                                                                                                                                                                                                                           |                                                              | Female (69%) Male (31%)                                                                                                 |                      |                          |                        |                  |                    | X                               | X                   |                     |                                     | X                            |                              |                                              |                           |                                      | 3                              |   |
| Limited Prosocial Emotions Questionnaire (LPEQ)                | Castagna et al. (2021)                     | Self-Report | 1050 caregivers of children                                                                                                                                                                                                                                                                           | 20-72                                                        | 470 male, 580 female                                                                                                    | X                    |                          |                        | X                | X                  |                                 | X                   |                     |                                     | X                            |                              |                                              |                           |                                      | 5                              |   |
|                                                                | Castagna et al. (2020)                     | Self-Report | 1050 children                                                                                                                                                                                                                                                                                         | R: 5-12                                                      | Female (48%) Male (52%)                                                                                                 | X                    |                          |                        | X                | X                  |                                 | X                   |                     |                                     |                              |                              |                                              |                           |                                      | 4                              |   |
| Machiavellian Personality Scale (MPS)                          | Miller et al. (2015)                       | Self-Report | 282 adults                                                                                                                                                                                                                                                                                            |                                                              | Female (57.7%) Male (42.3%)                                                                                             |                      |                          |                        |                  |                    |                                 |                     |                     | X                                   |                              |                              |                                              |                           |                                      | 1                              |   |
| Marital Communication Inventory (MCI)                          | Schumm et al. (1983)                       | Self-Report | 238 women                                                                                                                                                                                                                                                                                             |                                                              | Female (100%) Male (0%)                                                                                                 | X                    |                          |                        |                  | X                  |                                 | X                   |                     |                                     |                              |                              | X                                            |                           |                                      | 4                              |   |
| Measure of Caring in Nursing as Communicative Action [Unnamed] | Sumner & Fisher (2008)                     | Self-Report | 82 nurses                                                                                                                                                                                                                                                                                             |                                                              | Female (85.4%) Male (7.3%) Other (7.3%)                                                                                 | X                    |                          |                        |                  |                    |                                 |                     |                     | X                                   |                              |                              |                                              |                           |                                      | 2                              |   |
| Measure of Orientations Toward Empathic and Sympathetic Care   | Hojat et al. (2011)                        | Self-Report | 258 medical students                                                                                                                                                                                                                                                                                  |                                                              | N/a                                                                                                                     | X                    |                          |                        |                  | X                  |                                 | X                   |                     |                                     |                              |                              |                                              |                           |                                      | 4                              |   |
|                                                                |                                            |             | 93 adults recruited through MTurk (Sample 1), 287 employed adults recruited through MTurk (Sample 2, EFA), 359 employed adults recruited through MTurk (Sample 3, CFA), 354 employed adults recruited through MTurk (Sample 4) (N=1093)                                                               |                                                              | Female (55%) Male (45%)                                                                                                 | X                    |                          |                        | X                | X                  | X                               | X                   |                     |                                     |                              | X                            |                                              |                           | X                                    | 9                              |   |
| Measure of Relational Climate [Unnamed]                        | Boyatzis & Rochford (2020)                 | Self-Report |                                                                                                                                                                                                                                                                                                       |                                                              | Female (57.3%) Male (42.7%)                                                                                             | X                    |                          |                        | X                | X                  | X                               | X                   |                     |                                     |                              | X                            |                                              |                           | X                                    | 5                              |   |
| Medical Condition Regard Scale (MCRS)                          | Williams et al. (2013b)                    | Self-Report | 783 undergraduate paramedic students                                                                                                                                                                                                                                                                  |                                                              | Female (58.6%) Male (41.4%)                                                                                             | X                    |                          |                        | X                | X                  |                                 |                     |                     | X                                   |                              |                              |                                              |                           |                                      | 5                              |   |
| Medical Humanities Questionnaire                               | Wang (2011)                                | Self-Report | 449 adults                                                                                                                                                                                                                                                                                            | R: younger than 20 to over 51                                | Female (58.6%) Male (41.4%)                                                                                             | X                    |                          |                        | X                | X                  |                                 |                     |                     | X                                   |                              |                              |                                              |                           |                                      | 4                              |   |
|                                                                |                                            |             | 470 French Canadian undergraduate and graduate students (Study 1), 298 Canadian undergraduate students (Study 2) (N=768)                                                                                                                                                                              | Study 1: M = 27.27 Study 2: M = 26.61                        | N/a                                                                                                                     |                      |                          |                        |                  |                    |                                 |                     | X                   | X                                   |                              |                              |                                              |                           |                                      | 2                              |   |
| Mental States Task (MST)                                       | Beaulieu-Pelletier et al. (2013)           | Self-Report |                                                                                                                                                                                                                                                                                                       |                                                              | N/a                                                                                                                     |                      |                          |                        |                  |                    |                                 |                     | X                   | X                                   |                              |                              |                                              |                           |                                      | 2                              |   |
| Mentalized Affectivity Scale (MAS)                             | Greenberg et al. (2017)                    | Self-Report | 2840 adults                                                                                                                                                                                                                                                                                           | R: 18-65                                                     | Female (55%) Male (42%) Other (2%)                                                                                      | X                    |                          |                        | X                | X                  |                                 | X                   | X                   | X                                   |                              |                              |                                              |                           |                                      | 6                              |   |
| Military Suicide Attitudes Questionnaire Short-Form (MSAQ-SF)  | Cramer et al. (2022)                       | Self-Report | study 1: 200 treatment-seeking active duty service members; study 2: 1116 all active duty members within the statewide Army National Guard group                                                                                                                                                      | study 1: M=26.99 (SD=6.41)                                   | study 1: 77% male, 19.5% female; study 2: 86.1% male, 13.9% female                                                      | X                    |                          |                        |                  |                    |                                 |                     |                     | X                                   | X                            | X                            |                                              |                           |                                      | 4                              |   |
| Millennial Organizational Citizenship Behavior (OCB) Scale     | Chou et al. (2021)                         | Self-Report | study 1: 101 full-time Millennial workers enrolled in business programs; study 2: 345 full-time Millennial employees enrolled in business programs; study 3: 416 full-time Millennial workers                                                                                                         | study 1 & 2: M = 28.34, study 3: M = 31.2.                   | study 1: 102 females, study 2: 203 females, study 3: 189 females                                                        | X                    |                          |                        | X                | X                  | X                               | X                   |                     | X                                   | X                            | X                            |                                              |                           |                                      | 8                              |   |
| Mindful Attention Awareness Scale (MAAS)                       | González-Blanch et al. (2022)              | Self-Report | 150 participants with remitted first-episode psychosis                                                                                                                                                                                                                                                | M=20.8, SD=2.9                                               | 55.3% male                                                                                                              | X                    | X                        |                        | X                | X                  |                                 | X                   | X                   | X                                   | X                            | X                            |                                              | X                         |                                      | 9                              |   |
| Mindful Parenting Inventory for Children (MPIC)                | Acet & Oliver (2023)                       | Self-Report | 90 children                                                                                                                                                                                                                                                                                           |                                                              | Female (51.9%)                                                                                                          | X                    |                          |                        | X                | X                  |                                 | X                   | X                   | X                                   | X                            | X                            |                                              |                           |                                      | 3                              |   |
| Mindful Parenting Inventory for Parents (MPIP)                 | Acet & Oliver (2023)                       | Self-Report | 135 birth mothers                                                                                                                                                                                                                                                                                     | 28-67                                                        | Female (100%)                                                                                                           | X                    |                          |                        | X                | X                  |                                 | X                   | X                   | X                                   | X                            | X                            |                                              |                           |                                      | 5                              |   |
| Mindful Self-Care Scale (MSCS)                                 |                                            |             |                                                                                                                                                                                                                                                                                                       |                                                              |                                                                                                                         | X                    |                          |                        | X                | X                  |                                 | X                   | X                   | X                                   | X                            | X                            |                                              |                           |                                      | 5                              |   |
|                                                                | Holchikiss & Cook-Cotrone (2019)           | Self-Report | 858 hospice and healthcare professionals                                                                                                                                                                                                                                                              |                                                              | Females (60.7%) Males (39.3%)                                                                                           | X                    |                          |                        | X                | X                  |                                 | X                   |                     |                                     | X                            |                              |                                              |                           |                                      | 4                              |   |
|                                                                | Cook-Cotrone & Guyker (2018)               | Self-Report | 448 adults recruited from university class, social media, and MTurk (Sample 1), 452 adults recruited from university class, social media, and MTurk (Sample 2) (N=900)                                                                                                                                |                                                              | Female (74.7%) Male (25.3%)                                                                                             | X                    |                          |                        | X                | X                  |                                 | X                   |                     |                                     | X                            |                              |                                              |                           |                                      | 5                              |   |
| Minnesota Multiphasic Personality Inventory-2 (MMPI-2)         |                                            | Self-Report |                                                                                                                                                                                                                                                                                                       |                                                              |                                                                                                                         | X                    |                          |                        | X                | X                  |                                 | X                   |                     | X                                   | X                            |                              |                                              |                           |                                      | 5                              |   |
|                                                                | Sweeney et al. (2021)                      | Self-Report | 179 mental health patients                                                                                                                                                                                                                                                                            | M = 46.6                                                     | 61.5% female                                                                                                            | X                    |                          |                        | X                | X                  |                                 | X                   |                     | X                                   | X                            |                              |                                              |                           |                                      | 5                              |   |
|                                                                | Williams, Dalgleish, Karl, & Kuyken (2014) | Self-Report |                                                                                                                                                                                                                                                                                                       |                                                              | Female (68%) Male (32%)                                                                                                 | X                    |                          |                        | X                | X                  |                                 | X                   |                     | X                                   | X                            |                              |                                              |                           |                                      | 2                              |   |
|                                                                | Rushon & Irwing (2009)                     | Self-Report |                                                                                                                                                                                                                                                                                                       |                                                              | Female (56%) Male (44%)                                                                                                 | X                    |                          |                        | X                | X                  |                                 | X                   |                     | X                                   | X                            |                              |                                              |                           |                                      | 3                              |   |
|                                                                |                                            |             | 93 undergraduate students (Study 1), 111 undergraduate students (Study 2), 163 undergraduate students (Study 3), 135 undergraduate students (Study 4) (N=492)                                                                                                                                         |                                                              | Study 1: Female 28%, Male 72% Study 2: Female 30%, Male 70% Study 3: Female 35%, Male 65% Study 4: Female 71%, Male 29% | X                    | X                        |                        |                  |                    | X                               |                     |                     |                                     |                              |                              |                                              |                           |                                      |                                | 3 |
| Mville-Guzman University-Diversity Scale                       | Mville et al. (1999)                       | Self-Report |                                                                                                                                                                                                                                                                                                       |                                                              | Female (58.6%) Male (41.4%)                                                                                             | X                    |                          |                        | X                | X                  |                                 | X                   |                     |                                     |                              |                              |                                              | X                         |                                      | 3                              |   |
| Modified Version of Empathic Accuracy Task (EAT)               | Mackes et al. (2018)                       | Self-Report | 94 adults                                                                                                                                                                                                                                                                                             |                                                              | Female (49%) Male (50%)                                                                                                 | X                    |                          |                        | X                | X                  |                                 | X                   |                     |                                     |                              |                              |                                              |                           |                                      | 3                              |   |
| Moral Courage Scale for Physicians (MCSP)                      | Martinez et al. (2016)                     | Self-Report | 352 medical interns and residents                                                                                                                                                                                                                                                                     |                                                              | Female (49%) Male (50%)                                                                                                 | X                    |                          |                        | X                | X                  |                                 | X                   |                     | X                                   |                              |                              |                                              |                           |                                      | 3                              |   |
|                                                                |                                            |             | 117 adults recruited through MTurk (Study 1), 119 adults recruited through MTurk (Study 2), 268 adults recruited through MTurk (Study 3), 81 adults recruited through MTurk (Study 4), 87 adults recruited through MTurk (Study 5), 89 Australian undergraduate psychology students (Study 6) (N=792) |                                                              | Female (47.62%) Male (52.38%)                                                                                           | X                    |                          |                        | X                | X                  |                                 | X                   | X                   |                                     |                              |                              | X                                            |                           |                                      |                                | 4 |
| Moral Expansiveness Scale (MES)                                | Crimston et al. (2016)                     | Self-Report |                                                                                                                                                                                                                                                                                                       |                                                              | Female (37%) Male (63%)                                                                                                 | X                    | X                        |                        | X                | X                  | X                               | X                   | X                   | X                                   | X                            | X                            |                                              |                           |                                      | 10                             |   |
| Moral Foundations Questionnaire (MFQ)                          | Graham et al. (2011)                       | Self-Report | 34476 adults                                                                                                                                                                                                                                                                                          | study 1: M = 33.54, SD=14.13; study 2: M=39.79, SD=14.80     | study 1: 70% male; study 2: 61% female                                                                                  | X                    |                          |                        | X                | X                  |                                 | X                   | X                   | X                                   | X                            | X                            |                                              |                           |                                      | 4                              |   |
| Moral Foundations Questionnaire - Revised (MFQ-r)              | Harper & Rhodes (2021)                     | Self-Report |                                                                                                                                                                                                                                                                                                       |                                                              | Female (56.1%) Male (43.9%)                                                                                             | X                    |                          |                        | X                | X                  |                                 | X                   | X                   | X                                   | X                            | X                            |                                              |                           |                                      | 8                              |   |
| Moral Inclusion/Exclusion of Other Groups Scale (MIEG)         | Passini & Morelli (2017)                   | Self-Report | 1345 adults                                                                                                                                                                                                                                                                                           |                                                              | Female (56.1%) Male (43.9%)                                                                                             | X                    |                          |                        | X                | X                  |                                 | X                   | X                   | X                                   | X                            | X                            |                                              |                           |                                      | 4                              |   |
| Moral Mosaic - Short Form                                      | Bell & Showers (2021)                      | Self-Report | 449 undergraduates                                                                                                                                                                                                                                                                                    | M=18.7 (SD=1.56)                                             | 333 female                                                                                                              | X                    |                          |                        | X                | X                  |                                 | X                   | X                   | X                                   | X                            | X                            |                                              |                           |                                      | 4                              |   |
| Multicultural Personality Questionnaire (MPQ)                  |                                            |             |                                                                                                                                                                                                                                                                                                       |                                                              |                                                                                                                         | X                    |                          |                        | X                | X                  |                                 | X                   | X                   | X                                   | X                            | X                            |                                              |                           |                                      | 4                              |   |
|                                                                | Rushon & Irwing (2009)                     | Self-Report |                                                                                                                                                                                                                                                                                                       |                                                              | Female (69%) Male (31%)                                                                                                 | X                    |                          |                        | X                | X                  |                                 | X                   |                     | X                                   | X                            | X                            |                                              |                           |                                      | 3                              |   |
|                                                                | Van Oudenhoven & Van Der Zee (2002)        | Self-Report | 171 international business school students                                                                                                                                                                                                                                                            |                                                              | Female (54%) Male (46%)                                                                                                 | X                    |                          |                        | X                | X                  |                                 | X                   |                     | X                                   | X                            | X                            |                                              |                           |                                      | 3                              |   |
| Multicultural Personality Questionnaire Short Form (MPQ-SF)    | Hothuis et al. (2020)                      | Self-Report | 519 first-year students of an international English-language bachelor program                                                                                                                                                                                                                         | M=19.1, SD=1.58                                              | 60.5% female, 14.5% male, 25% other                                                                                     | X                    | X                        |                        | X                | X                  |                                 | X                   |                     | X                                   | X                            | X                            |                                              |                           |                                      | 2                              |   |
| Multi-Dimensional Support Scale (MDSS)                         | Neuling & Winefield (1988)                 | Self-Report | 58 breast cancer patients with no previous life threatening illness                                                                                                                                                                                                                                   |                                                              | Female (100%) Male (0%)                                                                                                 | X                    |                          |                        | X                | X                  |                                 | X                   |                     | X                                   | X                            | X                            |                                              |                           |                                      | 1                              |   |
| Multifaceted Empathy Test (MET)                                |                                            |             |                                                                                                                                                                                                                                                                                                       |                                                              |                                                                                                                         | X                    |                          |                        | X                | X                  |                                 | X                   |                     | X                                   | X                            | X                            |                                              |                           |                                      | 5                              |   |
|                                                                | Peretti et al. (2019)                      | Self-Report | 19 undergraduate students (Development Study), 80 undergraduate students (Validation Study) (N=99)                                                                                                                                                                                                    |                                                              | Female (72.5%) Male (27.5%)                                                                                             | X                    |                          |                        | X                | X                  |                                 | X                   |                     | X                                   | X                            | X                            |                                              |                           |                                      | 3                              |   |
| My Emotions Questionnaire                                      | Foell et al. (2018)                        | Self-Report |                                                                                                                                                                                                                                                                                                       |                                                              | Female (72.5%) Male (27.5%)                                                                                             | X                    |                          |                        | X                | X                  |                                 | X                   | X                   | X                                   | X                            | X                            |                                              |                           |                                      | 7                              |   |
|                                                                | Leerkes & Qu (2020)                        | Self-Report | 259 primiparous mothers                                                                                                                                                                                                                                                                               | M=25                                                         | 100% women                                                                                                              | X                    |                          |                        | X                | X                  |                                 | X                   | X                   | X                                   | X                            | X                            |                                              |                           |                                      | 7                              |   |
|                                                                | Kiamann et al. (2019)                      | Self-Report | 240 first-time mothers                                                                                                                                                                                                                                                                                |                                                              | Female (100%) Male (0%)                                                                                                 | X                    |                          |                        | X                | X                  |                                 | X                   | X                   | X                                   | X                            | X                            |                                              |                           |                                      | 3                              |   |
| Namian Character Virtue Scales (NCVS)                          | Francis et al. (2017)                      | Self-Report | 56 adolescent students                                                                                                                                                                                                                                                                                | R: 12-13                                                     | Female (55.3%) Male (44.7%)                                                                                             | X                    |                          |                        | X                | X                  |                                 | X                   |                     | X                                   | X                            | X                            |                                              |                           |                                      | 2                              |   |
| Non-Verbal Compassionate Communication Questionnaire           | Moelroy & Esterhuizen (2017)               | Self-Report | 20 undergraduate or postgraduate nursing students (Lay Expert Sample), 3 nursing experts (Research Expert Sample) (N=23)                                                                                                                                                                              |                                                              | N/a                                                                                                                     |                      |                          |                        | X                | X                  |                                 | X                   |                     | X                                   | X                            | X                            |                                              |                           |                                      | 1                              |   |

| Instrument                                                                            | Reference                      | Study Type  | Study Population                                                                                                                                   | Age (range [R] and/or Mean [M] with Standard Deviation [SD]) | Gender                                                                             | Internal Consistency                                                                  | Test Re-Test Reliability | Interrater Reliability | Content Validity | Construct Validity | Discriminant/Divergent Validity | Convergent Validity | Predictive Validity | Factor Analysis/Principal Component | Confirmatory Factor Analysis | Structural Equation Modeling | Control/Correlation with Social Desirability | Other Advanced Statistics | Other Based Responding or Lie Scale | Total Psychometric Assessments |
|---------------------------------------------------------------------------------------|--------------------------------|-------------|----------------------------------------------------------------------------------------------------------------------------------------------------|--------------------------------------------------------------|------------------------------------------------------------------------------------|---------------------------------------------------------------------------------------|--------------------------|------------------------|------------------|--------------------|---------------------------------|---------------------|---------------------|-------------------------------------|------------------------------|------------------------------|----------------------------------------------|---------------------------|-------------------------------------|--------------------------------|
| Nurse-Nursing Assistant-Caregiver Reciprocity Scale (NN-CRS)                          | Ameia Yen-Patton et al. (2013) | Self-Report | 1050 nursing assistant caregivers                                                                                                                  |                                                              | N/a                                                                                | X                                                                                     |                          |                        | X                |                    |                                 |                     |                     | X                                   |                              |                              |                                              |                           |                                     | 3                              |
| Nurses' Confidence Scale: Unique Families (NCSUF)                                     | Grassley et al. (2020)         | Self-Report | 62 nurses                                                                                                                                          |                                                              | N/a                                                                                | X                                                                                     |                          |                        | X                | X                  |                                 | X                   |                     | X                                   |                              |                              |                                              |                           |                                     | 1                              |
| Nursing Dimensions Inventory (NDI)                                                    | Watson (2003)                  | Self-Report | 38 nursing lecturers                                                                                                                               |                                                              | N/a                                                                                |                                                                                       | X                        |                        |                  |                    |                                 | X                   |                     | X                                   |                              |                              |                                              |                           |                                     | 5                              |
| Nursing Motives for Helping Scale (N-MHS)                                             | Nassar (2021)                  | Self-Report | 361 nurses                                                                                                                                         |                                                              | M=33.4 (SD=7.4)                                                                    |                                                                                       |                          |                        |                  |                    |                                 |                     |                     | X                                   | X                            |                              |                                              |                           |                                     | 1                              |
| Nursing Shared Decision-Making Attitude Scale (NSDMA)                                 | Hsu et al. (2021)              | Self-Report | 451 nursing staff                                                                                                                                  |                                                              | M=42.01, SD=10.38                                                                  |                                                                                       |                          |                        | X                | X                  | X                               | X                   | X                   | X                                   | X                            | X                            |                                              |                           |                                     | 8                              |
| Open-Minded Cognition Scale [Unnamed]                                                 | Price et al. (2015)            | Self-Report | 219 adults                                                                                                                                         |                                                              | Female (47.7%) Male (52.3%)<br>Female (66.9%) Male (33.1%)                         | X                                                                                     |                          |                        |                  |                    | X                               | X                   | X                   |                                     | X                            |                              |                                              |                           |                                     | 5                              |
| Orientation Model                                                                     | Wilkinson (2019)               | Self-Report | 375 undergraduate students                                                                                                                         |                                                              | N/a                                                                                | X                                                                                     |                          |                        | X                | X                  |                                 |                     |                     |                                     |                              |                              |                                              | X                         |                                     | 3                              |
| OSPA Inventory                                                                        | Washburne (1935)               | Self-Report | 3114 adults                                                                                                                                        |                                                              | N/a                                                                                | X                                                                                     |                          |                        | X                |                    |                                 |                     |                     |                                     |                              |                              |                                              |                           |                                     | 2                              |
| Other Dyadic Perspective-Taking Scale (ODOPT)                                         | Long (1990)                    | Self-Report |                                                                                                                                                    |                                                              | N/a                                                                                | X                                                                                     | X                        |                        | X                |                    |                                 |                     |                     | X                                   |                              |                              |                                              | X                         |                                     | 5                              |
| Parental Empathy Measure (PEM)                                                        | Kipatrack (2005)               | Self-Report | 103 parents                                                                                                                                        |                                                              | Female (88%) Male (12%)                                                            | X                                                                                     |                          | X                      | X                | X                  | X                               | X                   |                     |                                     |                              |                              | X                                            |                           |                                     | 6                              |
| Partner Synchrony Inventory (PSI)                                                     | Kahans et al. (1997)           | Self-Report | 54 couples presenting for marital therapy (N=108)                                                                                                  |                                                              | N/a                                                                                | X                                                                                     |                          |                        |                  |                    |                                 |                     |                     | X                                   |                              |                              |                                              |                           |                                     | 3                              |
| Patient Experience Survey in Radiation Therapy                                        | Hashmi et al. (2019)           | Self-Report | 10 patients receiving radiation therapy treatment (Development Study), 66 patients receiving radiation therapy treatment (Validation Study) (N=66) |                                                              | N/a                                                                                |                                                                                       |                          |                        |                  |                    |                                 |                     |                     |                                     |                              |                              |                                              |                           |                                     | 0                              |
| Patient-Physician Relationship Scale - Physician (PPRS-Physician)                     | Feingold et al. (2021)         | Self-Report | 1113 physicians                                                                                                                                    |                                                              | M=65.1                                                                             | X                                                                                     |                          |                        | X                | X                  |                                 | X                   |                     | X                                   |                              |                              |                                              |                           |                                     | 5                              |
| Patient-Reported Compassion Measure [Unnamed]                                         | Sindair et al. (2020)          | Self-Report | 33 (8 SME, 9 PAG, 16 patients)                                                                                                                     |                                                              | not indicated                                                                      |                                                                                       |                          |                        |                  | X                  |                                 |                     |                     |                                     |                              |                              |                                              |                           |                                     | 1                              |
| Patient Satisfaction Scale                                                            | Westaway et al. (2002)         | Self-Report | 263 black diabetic outpatients                                                                                                                     |                                                              |                                                                                    | X                                                                                     |                          |                        |                  |                    | X                               | X                   |                     | X                                   |                              |                              |                                              |                           |                                     | 4                              |
| Pediatric-Hematology Oncology Fellowship Training Skills Measure [Unnamed]            | Kesselheim et al. (2017)       | Self-Report | 90 hematology-oncology fellows                                                                                                                     |                                                              |                                                                                    | X                                                                                     |                          |                        |                  |                    |                                 |                     | X                   |                                     |                              |                              |                                              |                           |                                     | 2                              |
| Peer Edmonton Empathy Recruitment Scale (PEERS)                                       | Dubue et al. (2016)            | Self-Report | 1439 Canadian undergraduate students                                                                                                               |                                                              |                                                                                    | X                                                                                     | X                        |                        |                  |                    |                                 |                     | X                   | X                                   |                              |                              | X                                            |                           |                                     | 5                              |
| Perceived Empathic and Social Self-Efficacy Scale (PESE)                              | Sánchez et al. (2016)          | Self-Report | 194 adults with primary diagnosis of serious mental illness                                                                                        |                                                              | 18+                                                                                | X                                                                                     |                          |                        | X                | X                  |                                 |                     |                     |                                     | X                            |                              |                                              |                           |                                     | 3                              |
| Person-Centered Care Assessment Tool (P-CAT)                                          | Gordon et al. (2022)           | Self-Report | 35 aged care workers                                                                                                                               |                                                              |                                                                                    | not indicated                                                                         | X                        | X                      | X                | X                  |                                 |                     |                     |                                     |                              |                              |                                              |                           |                                     | 4                              |
| Person-Centred Caring: Participation [Unnamed]                                        | Strachan et al. (2020)         | Self-Report | 705 patients                                                                                                                                       |                                                              | M = 76, SD = 14                                                                    | X                                                                                     |                          |                        | X                | X                  | X                               | X                   | X                   | X                                   |                              |                              |                                              |                           |                                     | 5                              |
| Person-Centred Caring: Personalization [Unnamed]                                      | Strachan et al. (2020)         | Self-Report | 705 patients                                                                                                                                       |                                                              | M = 68, SD=17                                                                      | X                                                                                     |                          |                        | X                | X                  | X                               | X                   | X                   | X                                   |                              |                              |                                              |                           |                                     | 5                              |
| Person-Centred Caring: Responsiveness [Unnamed]                                       | Strachan et al. (2020)         | Self-Report | 644 patients                                                                                                                                       |                                                              | M = 70, SD = 17                                                                    | X                                                                                     |                          |                        | X                | X                  | X                               | X                   | X                   | X                                   |                              |                              |                                              |                           |                                     | 5                              |
| Personal Orientation Inventory (POI)                                                  |                                |             |                                                                                                                                                    |                                                              |                                                                                    |                                                                                       |                          |                        |                  | X                  |                                 |                     |                     |                                     |                              |                              |                                              |                           |                                     | 1                              |
| Leak (1984)                                                                           |                                | Self-Report | 90 undergraduate psychology students                                                                                                               |                                                              |                                                                                    | R: 18-28                                                                              |                          |                        |                  |                    |                                 |                     |                     |                                     |                              |                              |                                              |                           |                                     | 1                              |
| Fiacher & Knapp (1977)                                                                |                                | Self-Report | 30 graduate social work students                                                                                                                   |                                                              |                                                                                    | N/a                                                                                   | X                        | X                      |                  |                    |                                 |                     |                     |                                     |                              |                              |                                              | X                         |                                     | 3                              |
| Personal Strengths Inventory (PSI)                                                    | Kienfie Liaw et al. (2011)     | Self-Report | 410 adolescents in Singapore (Study 1), 588 adolescents in Singapore (Study 2) (N=1008)                                                            |                                                              |                                                                                    | X                                                                                     |                          |                        |                  |                    |                                 | X                   |                     | X                                   | X                            |                              |                                              |                           |                                     | 4                              |
| Personal Trust and Connections scale (PerTC)                                          | Symvoulakis et al. (2022)      | Self-Report | 218 health care providers                                                                                                                          |                                                              | M = 14.8, SD = 10.5                                                                | X                                                                                     |                          |                        | X                | X                  |                                 | X                   |                     | X                                   | X                            |                              |                                              |                           |                                     | 5                              |
| Personality Assessment Inventory-Borderline Features Scale (PAI-BOR)                  | Waugh et al. (2021)            | Self-Report | 28 graduate students and PhD-Level psychologists                                                                                                   |                                                              | M = 29.36, SD = 8.23                                                               | not indicated                                                                         |                          | X                      | X                |                    |                                 |                     |                     |                                     |                              |                              |                                              |                           |                                     | 2                              |
| Peace Attitude Scale (PAS)                                                            | Broccoli et al. (2021)         | Self-Report | 499 adolescents and adults                                                                                                                         |                                                              | M = 23.04, SD = 2.345                                                              | X                                                                                     | X                        |                        | X                | X                  | X                               | X                   |                     | X                                   |                              |                              |                                              |                           |                                     | 7                              |
| Perth Empathy Scale (PES)                                                             | Brett et al. (2023)            | Self-Report | study 1: 316 undergraduates<br>study 2: 331 undergraduates                                                                                         |                                                              | study 1: 32-17 mean age<br>SD = 12.41<br>study 2: 16-56, M = 20.82, SD = 5.33      | X                                                                                     |                          |                        | X                | X                  | X                               | X                   |                     | X                                   | X                            |                              |                                              | X                         |                                     | 7                              |
| Pharmacists' Care of Migraineurs Scale (PCMS)                                         | Skomo et al. (2009)            | Self-Report | 580 pharmacists                                                                                                                                    |                                                              | M = 23.04, SD = 2.345                                                              | X                                                                                     |                          |                        | X                | X                  | X                               | X                   |                     | X                                   |                              |                              |                                              |                           |                                     | 2                              |
| Phenomenological Body Shame Scale - Revised (PBSS-R)                                  | Siegel et al. (2021)           | Self-Report | study 1: 350 women participants; study 2: 241 women psychology students; study 3: 235 women participants                                           |                                                              | study 1: M=31.14, SD=11.47; study 2: M=19.27, SD=14.43; study 3: M=37.51, SD=11.07 | 100% women                                                                            |                          |                        | X                | X                  | X                               | X                   |                     | X                                   | X                            |                              |                                              |                           |                                     | 6                              |
| Posttraumatic Growth Inventory (PTGI)                                                 | Morris et al. (2013)           | Self-Report | 514 prostate cancer survivors                                                                                                                      |                                                              |                                                                                    | Female (0%) Male (100%)                                                               |                          |                        | X                |                    |                                 | X                   |                     | X                                   | X                            |                              |                                              |                           |                                     | 3                              |
| Pregnant Women with HIV Attitude Scale                                                | Tyer-Viola & Duffy (2010)      | Self-Report | 209 obstetric nurses                                                                                                                               |                                                              |                                                                                    | Female (97.6%) Male (2.4%)                                                            |                          |                        | X                |                    |                                 |                     |                     | X                                   |                              |                              |                                              |                           |                                     | 3                              |
| Prejudice Confrontation Styles (PCS) Scale                                            | Chaney & Sanchez (2022)        | Self-Report | study 1: 388 undergraduates; study 2: 276 undergraduates; study 3: 248 US undergraduate women                                                      |                                                              | study 1: M=19.29, SD=2.48; study 2: M=18.84, SD=1.46; study 3: M=18.52, SD=1.13    | study 1: 59.5% women, 40.5% men; study 2: 71.7% women, 28.3% men; study 3: 100% women | X                        | X                      | X                | X                  | X                               | X                   | X                   | X                                   | X                            | X                            |                                              |                           |                                     | 10                             |
| Prejudice toward People with Borderline Personality Disorder (PPBD) Scale             | Sheppard et al. (2023)         | Self-Report | sample 1: 217 Australian and New Zealand students; sample 2: 303 Australian undergraduate psychology students; sample 3: 314 general public        |                                                              | study 1: M=26.8, SD=8.13; study 2: M=21.6, SD=2.57; study 3: M=29.75, SD=10.57     | sample 1: 82% female; sample 2: 59% female; sample 3: 51% female                      |                          |                        | X                | X                  | X                               | X                   |                     | X                                   | X                            |                              |                                              |                           |                                     | 4                              |
| Prejudice toward People with Depression (PPD)                                         | Bizumic & Cunningham (2022)    | Self-Report | 406 participants                                                                                                                                   |                                                              | M = 27.43, SD = 10.76                                                              | 64% female                                                                            | X                        |                        | X                | X                  | X                               | X                   |                     | X                                   | X                            | X                            |                                              |                           |                                     | 8                              |
| Prejudice toward People with Schizophrenia (PPS)                                      | Bizumic & Cunningham (2022)    | Self-Report | 406 participants                                                                                                                                   |                                                              | M = 27.43, SD = 10.76                                                              | 64% female                                                                            | X                        |                        | X                | X                  | X                               | X                   |                     | X                                   | X                            | X                            |                                              |                           |                                     | 8                              |
| Princess Margaret Hospital Patient Satisfaction with Doctor Questionnaire (PMHPSQ-MD) | Loblaw et al. (1999)           | Self-Report | 277 cancer patients                                                                                                                                |                                                              |                                                                                    | Female (74%) Male (26%)                                                               |                          |                        | X                |                    | X                               | X                   |                     | X                                   | X                            |                              |                                              |                           |                                     | 4                              |
| Professional Quality of Life Scale (ProQoL)                                           |                                |             |                                                                                                                                                    |                                                              |                                                                                    |                                                                                       |                          |                        |                  | X                  | X                               | X                   |                     | X                                   | X                            |                              |                                              |                           |                                     | 6                              |
|                                                                                       | Keesler & Fukui (2020)         | Self-Report | 495 direct support professionals                                                                                                                   |                                                              |                                                                                    | Female (79.8%) Male (19.5%)                                                           |                          |                        | X                |                    |                                 | X                   |                     | X                                   | X                            |                              |                                              |                           |                                     | 2                              |
|                                                                                       | Geoffrion et al. (2019)        | Self-Report | 310 child protection workers                                                                                                                       |                                                              |                                                                                    | Female (84.5%) Male (15.5%)                                                           |                          |                        | X                | X                  | X                               | X                   |                     | X                                   | X                            |                              |                                              |                           |                                     | 5                              |
| Professional Quality of Life - Revised (ProQoL-21)                                    | Ahmed et al. (2022)            | Self-Report | 375 physicians                                                                                                                                     |                                                              | 52.43 mean age                                                                     | Female (42.4%)                                                                        |                          |                        | X                | X                  | X                               | X                   |                     | X                                   | X                            |                              |                                              |                           |                                     | 4                              |
|                                                                                       |                                |             | 273 Australian nurses (Sample 1), 303 Canadian nurses (Sample 2), 503 Canadian palliative care workers (Sample 3) (N=1079)                         |                                                              |                                                                                    | Female (97.2%) Male (12.8%)                                                           |                          |                        | X                | X                  | X                               | X                   |                     | X                                   | X                            |                              |                                              |                           |                                     | 6                              |
| Professional Quality of Life Scale - Version 5 (ProQoL-5)                             | Hemaworth et al. (2018)        | Self-Report | 12 medical students (Focus Groups), 20 family medicine experts (Delphi Method), 122 medical students (Psychometric) (N=154)                        |                                                              |                                                                                    |                                                                                       |                          |                        | X                | X                  | X                               | X                   |                     | X                                   | X                            |                              |                                              |                           |                                     | 6                              |
| Professionalism Assessment Scale (PAS)                                                | Kiemenc-Ketis & Vrecko (2014)  | Self-Report |                                                                                                                                                    |                                                              |                                                                                    |                                                                                       |                          |                        | X                | X                  | X                               | X                   |                     | X                                   | X                            |                              |                                              |                           |                                     | 5                              |
| Prosocial and Antisocial Behavior in Sport Scale (PABSS)                              |                                |             |                                                                                                                                                    |                                                              |                                                                                    |                                                                                       |                          |                        | X                | X                  | X                               | X                   |                     | X                                   | X                            |                              |                                              |                           |                                     | 9                              |
|                                                                                       | Kavussanu et al. (2013)        | Self-Report | 129 active athletes                                                                                                                                |                                                              |                                                                                    | Female (43.4%) Male (56.6%)                                                           |                          | X                      | X                | X                  | X                               | X                   |                     | X                                   | X                            |                              |                                              |                           |                                     | 5                              |
|                                                                                       | Kavussanu & Boardley (2009)    | Self-Report | 1213 team-sport athletes (Study 1), 106 team-sport athletes (Study 2) (N=1319)                                                                     |                                                              |                                                                                    | Female (46%) Male (54%)                                                               |                          |                        | X                | X                  | X                               | X                   |                     | X                                   | X                            |                              |                                              | X                         |                                     | 7                              |
| Prosocial Personality Battery (PSP)                                                   | Maki et al. (2017)             | Self-Report | 363 adults                                                                                                                                         |                                                              |                                                                                    | Female (43.6%) Male (56.4%)                                                           |                          |                        | X                | X                  | X                               | X                   |                     | X                                   | X                            |                              |                                              | X                         |                                     | 7                              |
| Prosocial Risk-Taking Scale (PSRT)                                                    | Armstrong-Carter et al. (2021) | Self-Report | 607 adolescents                                                                                                                                    |                                                              | 10-11                                                                              | Female (50.11%)                                                                       |                          | X                      | X                | X                  | X                               | X                   |                     | X                                   | X                            |                              |                                              |                           |                                     | 7                              |
| Psychopathic Personality Inventory - Short Form (PPI-SF)                              | Adams et al. (2020)            | Self-Report | 1257 undergraduate introductory psychology students                                                                                                |                                                              | 17-51                                                                              | Male (30.1%) Female (69.1%)                                                           |                          |                        | X                | X                  | X                               | X                   |                     | X                                   | X                            |                              |                                              |                           |                                     | 5                              |
| Psychosocial Costs of Racism to Whites Scale (PCRW)                                   |                                |             |                                                                                                                                                    |                                                              |                                                                                    |                                                                                       |                          |                        | X                | X                  | X                               | X                   |                     | X                                   | X                            |                              |                                              |                           |                                     | 8                              |
|                                                                                       | Potest & Spanierman (2008)     | Self-Report | 284 employed white adults                                                                                                                          |                                                              |                                                                                    | Female (51%) Male (49%)                                                               |                          |                        | X                | X                  | X                               | X                   |                     | X                                   | X                            |                              |                                              | X                         |                                     | 6                              |
|                                                                                       | Spanierman & Heppner (2004)    | Self-Report | 393 undergraduate students                                                                                                                         |                                                              |                                                                                    | N/a                                                                                   | X                        | X                      | X                | X                  | X                               | X                   |                     | X                                   | X                            |                              |                                              | X                         |                                     | 5                              |

| Instrument                                                                                              | Reference                            | Study Type  | Study Population                                                                                                                                                                                                                                                           | Age (range [R] and/or Mean [M] with Standard Deviation [SD])                                                        | Gender                                                                                         | Internal Consistency | Test Re-Test Reliability | Interrater Reliability | Content Validity | Construct Validity | Discriminant/Divergent Validity | Convergent Validity | Predictive Validity | Factor Analysis/Principal Component | Confirmatory Factor Analysis | Structural Equation Modeling | Control/Correlation with Social Desirability | Other Advanced Statistics | Other Biased Responding or Lie Scale | Total Psychometric Assessments |
|---------------------------------------------------------------------------------------------------------|--------------------------------------|-------------|----------------------------------------------------------------------------------------------------------------------------------------------------------------------------------------------------------------------------------------------------------------------------|---------------------------------------------------------------------------------------------------------------------|------------------------------------------------------------------------------------------------|----------------------|--------------------------|------------------------|------------------|--------------------|---------------------------------|---------------------|---------------------|-------------------------------------|------------------------------|------------------------------|----------------------------------------------|---------------------------|--------------------------------------|--------------------------------|
| Psychosocial Inventory of Ego Strengths (PIES)                                                          | Markstrom et al. (1997)              | Self-Report | 244 undergraduate students (Study 1)<br>153 undergraduate students (Study 2)<br>(N=397)                                                                                                                                                                                    |                                                                                                                     | Study 1: Female (100%)<br>Male (0%)<br>Study 2: Female (99%)<br>Male (1%)                      | X                    |                          |                        | X                |                    |                                 | X                   |                     |                                     |                              |                              |                                              |                           |                                      | 3                              |
| Public Attitudes Towards Homelessness (PATH)<br>Questionnaire of Cognitive and Affective Empathy (GCAE) | Guzewicz & Takoooshian (1992)        | Self-Report | 222 adults                                                                                                                                                                                                                                                                 |                                                                                                                     | Female (50%) Male (50%)                                                                        | X                    |                          |                        |                  | X                  |                                 |                     |                     | X                                   |                              |                              | X                                            | X                         |                                      | 5                              |
|                                                                                                         | Gomez et al. (2022)                  | Self-Report | 203 adults                                                                                                                                                                                                                                                                 | M=30.99, SD=11.79                                                                                                   | 43 men, 160 women                                                                              | X                    |                          | X                      |                  | X                  | X                               | X                   | X                   | X                                   | X                            | X                            |                                              | X                         |                                      | 10                             |
|                                                                                                         | Brunet et al. (2021)                 | Self-Report | 143 patients with schizophrenia or schizoaffective disorder                                                                                                                                                                                                                | M = 31.4, SD = 8.2                                                                                                  | 77.6% male                                                                                     | X                    |                          | X                      |                  | X                  | X                               |                     | X                   |                                     |                              |                              |                                              |                           |                                      | 6                              |
|                                                                                                         | Reniers et al. (2011)                | Self-Report | 640 adults (Study 1), 318 (Study 2)<br>(N=958)                                                                                                                                                                                                                             |                                                                                                                     | Study 1: Female (68.2%) Male (31.8%)<br>Study 2: Female (72.3%) Male (27.7%)                   |                      |                          |                        | X                |                    | X                               |                     |                     | X                                   | X                            |                              |                                              |                           |                                      | 4                              |
| Questionnaire Measure of Empathic Tendency                                                              | Mehrabian & Epstein (1972)           | Self-Report | 88 undergraduate students                                                                                                                                                                                                                                                  |                                                                                                                     | Female (68%) Male (42%)                                                                        |                      |                          |                        | X                | X                  |                                 |                     |                     |                                     |                              |                              |                                              |                           |                                      | 2                              |
| Range and Differentiation of Emotional Experience Scale (RDEES)                                         | Kang & Shaver (2004)                 | Self-Report | 400 undergraduate psychology students (Study 1), 729 undergraduate psychology students (Study 2) (N=1129)                                                                                                                                                                  | R: 17-51, M = 19.6 years, SD = 2.38                                                                                 | N/A                                                                                            | X                    |                          | X                      |                  | X                  | X                               | X                   |                     | X                                   |                              |                              | X                                            |                           |                                      | 7                              |
| Rating Scales for the Assessment of Empathic Communication in Medical Interviews (REM)                  | Nicolai et al. (2010)                | Self-Report | 118 German undergraduate students (Study 1), 23 German physicians (Study 2) (N=141)                                                                                                                                                                                        | Study 1: M = 25.4 Study 2: R: 35-58                                                                                 | Female (70.8%) Male (29.2%)                                                                    |                      |                          | X                      |                  |                    | X                               |                     | X                   |                                     |                              |                              |                                              |                           |                                      | 3                              |
| Reading the Mind in the Eyes Test (RMET)                                                                | Kettle et al. (2022)                 | Self-Report | N/A                                                                                                                                                                                                                                                                        | N/A                                                                                                                 | N/A                                                                                            | X                    |                          | X                      |                  | X                  | X                               | X                   | X                   | X                                   | X                            | X                            |                                              |                           |                                      | 9                              |
|                                                                                                         | Olderbak et al. (2015)               | Self-Report | 484 adults recruited through MTurk<br>108 patients with comorbid Borderline Personality Disorder and Eating Disorders; 295 undergraduate students and university staff (N=403)                                                                                             |                                                                                                                     | Female (50%) Male (50%)                                                                        | X                    |                          |                        |                  |                    |                                 | X                   |                     |                                     | X                            |                              |                                              | X                         |                                      | 4                              |
| Reflective Functioning Questionnaire                                                                    | Fonagy et al. (2016)                 | Self-Report |                                                                                                                                                                                                                                                                            |                                                                                                                     | Female (66.4%) Male (33.6%)                                                                    | X                    | X                        |                        |                  | X                  |                                 | X                   |                     |                                     | X                            | X                            |                                              |                           |                                      | 6                              |
| Relational Care Scale (RCS)                                                                             | Andersen & Havaei (2015)             | Self-Report | 62 nursing home residents                                                                                                                                                                                                                                                  |                                                                                                                     | N/A                                                                                            | X                    | X                        | X                      | X                | X                  | X                               | X                   |                     | X                                   |                              |                              |                                              |                           |                                      | 8                              |
|                                                                                                         | McGilton et al. (2005)               | Self-Report | 30 nursing staff members (Sample 1), 50 nursing staff members (Sample 2)                                                                                                                                                                                                   |                                                                                                                     | Female (67.8%) Male (32.2%)                                                                    | X                    | X                        | X                      | X                | X                  | X                               | X                   |                     | X                                   |                              |                              |                                              |                           |                                      | 5                              |
| Relational Competence for Community-Dwelling Elderly                                                    | Hogg & Heller (1990)                 | Self-Report | 291 low-income, community-dwelling elderly women                                                                                                                                                                                                                           |                                                                                                                     | Female (100%) Male (0%)                                                                        | X                    |                          |                        | X                | X                  | X                               | X                   | X                   | X                                   |                              |                              |                                              |                           |                                      | 7                              |
| Relational Depth (RD) Inventory                                                                         | Wiggins et al. (2012)                | Self-Report | 189 therapists, 152 clients, 2 uncalibrated (N=343)                                                                                                                                                                                                                        |                                                                                                                     | Female (74.9%) Male (23.3%) Other (1.2%)                                                       | X                    |                          | X                      |                  | X                  | X                               | X                   |                     | X                                   |                              |                              |                                              | X                         |                                      | 7                              |
| Relational Engagement of the Sacred for a Transgression (REST) Scale                                    | Davis et al. (2010)                  | Self-Report | 200 undergraduate students                                                                                                                                                                                                                                                 |                                                                                                                     | Female (59%) Male (41%)                                                                        | X                    |                          |                        |                  | X                  |                                 |                     | X                   | X                                   | X                            | X                            | X                                            | X                         | X                                    | 8                              |
| Relationship Inventory (RI)                                                                             | Cramer (1986)                        | Self-Report | 169 graduate students                                                                                                                                                                                                                                                      |                                                                                                                     | Female (68.6%) Male (31.4%)                                                                    |                      |                          |                        |                  |                    |                                 |                     |                     | X                                   |                              |                              |                                              | X                         |                                      | 2                              |
|                                                                                                         | Schumm et al. (1981)                 | Self-Report | 98 urban married couples (N=196)                                                                                                                                                                                                                                           |                                                                                                                     | Female (50%) Male (50%)                                                                        |                      |                          |                        |                  |                    |                                 |                     |                     | X                                   |                              |                              |                                              |                           |                                      | 3                              |
| Response Empathy Rating Scale                                                                           | Elliott et al. (1982)                | Self-Report | 28 counselor-client interactions rated by trained undergraduate students                                                                                                                                                                                                   |                                                                                                                     | N/A                                                                                            | X                    |                          |                        |                  |                    |                                 | X                   |                     |                                     |                              | X                            |                                              |                           |                                      | 1                              |
| Restorative Justice Attitudes Scale (RJAS)                                                              | Taylor & Bailey (2022)               | Self-Report | study 1: 315 participants; study 2: 335 participants                                                                                                                                                                                                                       | study 1: M = 35.08, SD = 12.45; study 2: M = 34.67, SD = 15.8                                                       | study 1: 21% man, 66% woman; study 2: 22% man, 55% woman                                       | X                    |                          | X                      | X                | X                  | X                               | X                   |                     | X                                   | X                            |                              |                                              |                           |                                      | 6                              |
| Revised Humane Caring Scale (RHCS)                                                                      | Goh et al. (2015)                    | Self-Report | 235 patients                                                                                                                                                                                                                                                               |                                                                                                                     | Female (47%) Male (53%)                                                                        | X                    | X                        |                        | X                | X                  |                                 |                     |                     |                                     |                              |                              |                                              |                           |                                      | 4                              |
|                                                                                                         | Yukhymenko-Lescroart & Sharma (2020) | Self-Report | study 1: 511 staff and students; study 2: 403 university students; study 3: 297 instructors and staff                                                                                                                                                                      | study 1: students: M=33.6, SD=7.59, staff: M=49.71, SD=12.27; study 2: M=27.75, SD=9.72; study 3: M=46.87, SD=12.11 | study 1: 72.3% female students; 54.8% female staff; study 2: 66% female; study 3: 66.9% female | X                    |                          |                        | X                | X                  | X                               | X                   | X                   | X                                   | X                            | X                            |                                              |                           |                                      | 7                              |
| Revised Sense of Purpose Scale (SOPS-2)                                                                 | Ahmed et al. (2014)                  | Self-Report | 24 general practitioner educational supervisors                                                                                                                                                                                                                            |                                                                                                                     | N/A                                                                                            |                      |                          |                        | X                |                    |                                 |                     |                     |                                     |                              |                              |                                              |                           |                                      | 1                              |
| Safety Skills Questionnaire [Unnamed]                                                                   | Thomas et al. (2019)                 | Self-Report | 39 adults                                                                                                                                                                                                                                                                  | R: 27-76                                                                                                            | Female (46%) Male (54%)                                                                        |                      |                          |                        |                  |                    |                                 |                     |                     |                                     |                              |                              |                                              |                           | X                                    | 1                              |
| San Diego Wisdom Scale (SD-WISE)                                                                        | Thomas et al. (2022)                 | Self-Report | 2093 participants                                                                                                                                                                                                                                                          | M = 46.3, SD = 14.6                                                                                                 | 55% woman                                                                                      | X                    |                          |                        |                  | X                  | X                               | X                   |                     | X                                   | X                            |                              |                                              |                           |                                      | 5                              |
| Santa Clara Brief Compassion Scale (SCBCS)                                                              | Plante & Mejia (2016)                | Self-Report | 6763 undergraduate students                                                                                                                                                                                                                                                |                                                                                                                     | Female (82.7%) Male (37.3%)                                                                    | X                    | X                        |                        | X                | X                  | X                               | X                   |                     | X                                   |                              |                              |                                              |                           |                                      | 6                              |
|                                                                                                         | Hwang et al. (2008)                  | Self-Report | 223 undergraduate students                                                                                                                                                                                                                                                 |                                                                                                                     | Female (75%) Male (25%)                                                                        | X                    |                          |                        |                  |                    |                                 |                     | X                   |                                     |                              |                              |                                              |                           |                                      | 2                              |
| Santa Clara Ethics Questionnaire (SCEs)                                                                 | Plante & McCreadie (2019)            | Self-Report | 329 undergraduate students                                                                                                                                                                                                                                                 |                                                                                                                     | Female (70%) Male (30%)                                                                        |                      |                          |                        |                  |                    |                                 |                     |                     |                                     |                              |                              |                                              | X                         |                                      | 1                              |
| Satisfaction with Simulation Experience Scale (SSES)                                                    | Courtney-Pratt et al. (2015)         | Self-Report | 497 nursing students                                                                                                                                                                                                                                                       |                                                                                                                     | Female (88.1%) Male (11.9%)                                                                    | X                    |                          |                        |                  |                    |                                 |                     | X                   | X                                   |                              |                              |                                              | X                         |                                      | 4                              |
| Scale of Ethnocultural Empathy (SEE)                                                                    | Fleming et al. (2015)                | Self-Report | 136 nursing and dental students                                                                                                                                                                                                                                            |                                                                                                                     | N/A                                                                                            | X                    |                          |                        |                  | X                  | X                               | X                   |                     | X                                   | X                            | X                            |                                              | X                         |                                      | 7                              |
|                                                                                                         | Albiero & Matricardi (2013)          | Self-Report | 610 Italian undergraduate students                                                                                                                                                                                                                                         |                                                                                                                     | Female (63.1%) Male (36.9%)                                                                    | X                    |                          |                        |                  | X                  | X                               | X                   |                     |                                     | X                            | X                            |                                              | X                         |                                      | 1                              |
|                                                                                                         | Wang et al. (2003)                   | Self-Report | 323 undergraduate students                                                                                                                                                                                                                                                 |                                                                                                                     | Female (66%) Male (34%)                                                                        |                      |                          |                        |                  |                    |                                 |                     |                     |                                     | X                            |                              |                                              |                           |                                      | 7                              |
| Scale of Humanistic Nursing Behaviors                                                                   | Fenton (1987)                        | Self-Report | 316 nursing staff                                                                                                                                                                                                                                                          |                                                                                                                     | N/A                                                                                            | X                    | X                        |                        |                  | X                  | X                               |                     |                     |                                     |                              |                              |                                              |                           |                                      | 4                              |
| Scale of Teacher Empathy for African American Males (S-TEAAM)                                           | Warren (2015)                        | Self-Report | 73 practicing classroom teachers                                                                                                                                                                                                                                           |                                                                                                                     | N/A                                                                                            | X                    |                          |                        |                  |                    |                                 |                     | X                   |                                     |                              |                              |                                              |                           |                                      | 2                              |
| Schadenfreude Scale                                                                                     | Crysel & Webster (2018)              | Self-Report | 802 undergraduate students and adults recruited through MTurk (Study 1), 192 adults recruited through MTurk (Study 2), 23 undergraduate psychology students (Study 3), 261 adults recruited through MTurk (Study 4), 304 adults recruited through MTurk (Study 5) (N=1587) | R: 18-71                                                                                                            | Female (48.5%) Male (49.3%) Other (2.2%)                                                       |                      | X                        |                        |                  |                    |                                 |                     | X                   | X                                   |                              |                              |                                              |                           |                                      | 4                              |
| Schema of Partner Empathic Responses to Anger (SOPERA)                                                  | Sarford (1998)                       | Self-Report | 74 married individuals                                                                                                                                                                                                                                                     |                                                                                                                     | Female (50%) Male (50%)                                                                        |                      | X                        |                        |                  |                    |                                 |                     |                     |                                     |                              |                              |                                              |                           |                                      | 1                              |
| School Support Scale                                                                                    | McLaughlin & Randolph (2012)         | Self-Report | 240 student-mothers                                                                                                                                                                                                                                                        |                                                                                                                     | Female (100%) Male (0%)                                                                        | X                    |                          |                        | X                | X                  | X                               | X                   | X                   | X                                   | X                            |                              |                                              |                           |                                      | 8                              |
| Secondary Traumatic Stress Scale (STSS)                                                                 | Ahmed et al. (2022)                  | Self-Report | 375 physicians                                                                                                                                                                                                                                                             | 52.43 mean age                                                                                                      | Female (42.4%)                                                                                 |                      |                          |                        | X                | X                  | X                               |                     |                     | X                                   | X                            |                              |                                              |                           |                                      | 4                              |
| Self and Interpersonal Functioning Scale (SIFS)                                                         | Gamache et al. (2019)                | Self-Report | 280 Canadian adults (Community Sample), 106 individuals seeking personality disorder treatment at an outpatient psychiatric clinic (Clinical Sample) (N=386)                                                                                                               |                                                                                                                     | N/A                                                                                            |                      |                          |                        | X                |                    |                                 |                     | X                   |                                     |                              |                              |                                              |                           |                                      | 2                              |
| Self-Compassion and Self-Criticism Scales (SCCS)                                                        | Falconer et al. (2015)               | Self-Report | 413 adults (Study 1), 90 adults (Study 2) (N=503)                                                                                                                                                                                                                          |                                                                                                                     | Female (61.6%) Male (38.4%)                                                                    | X                    |                          |                        |                  | X                  | X                               | X                   | X                   | X                                   | X                            | X                            | X                                            | X                         | X                                    | 4                              |
| Self-Compassion Scale (SCS)                                                                             | Rakhimov et al. (2023)               | Self-Report | 172 community participants, over-sampled for individuals receiving or seeking mental health treatment                                                                                                                                                                      | M age = 39.1 years; SD = 486<br>19.2; range 18 to 85                                                                | 198 men; 287 women; 2 gender-nonconforming people                                              |                      |                          |                        |                  |                    |                                 | X                   |                     | X                                   | X                            | X                            |                                              |                           |                                      | 4                              |
|                                                                                                         | Biehler & Naragon-Gainey (2022)      | Self-Report | 7443 participants                                                                                                                                                                                                                                                          | M = 35.1 (SD = 13.67)                                                                                               | 71% female                                                                                     | X                    |                          |                        |                  | X                  | X                               | X                   | X                   | X                                   | X                            | X                            |                                              |                           |                                      | 8                              |
|                                                                                                         | Finalahe et al. (2021)               | Self-Report | 1097 international respondents                                                                                                                                                                                                                                             | M=30.44, SD=11.33                                                                                                   | 31.8% male                                                                                     | X                    |                          |                        |                  | X                  | X                               | X                   | X                   | X                                   | X                            | X                            |                                              |                           |                                      | 4                              |
|                                                                                                         | Toth-Kiraly & Neff (2020)            | Self-Report | 248 individuals with a recent suicide attempt                                                                                                                                                                                                                              | R: 15-83, M = 31.16, SD = 13.45                                                                                     | Female (69.4%) Male (30.6%)                                                                    |                      |                          |                        |                  |                    |                                 |                     |                     |                                     |                              | X                            |                                              |                           |                                      | 1                              |
|                                                                                                         | Zhang et al. (2019)                  | Self-Report | 248 individuals with a recent suicide attempt                                                                                                                                                                                                                              |                                                                                                                     | Female (56%) Male (44%)                                                                        | X                    |                          |                        |                  |                    |                                 | X                   |                     |                                     | X                            |                              |                                              |                           |                                      | 3                              |



| Instrument                                                                 | Reference                 | Study Type  | Study Population                                                                                                                      | Age (range [R] and/or Mean [M] with Standard Deviation [SD])                  | Gender                                                                                                                 | Internal Consistency | Test Re-Test Reliability | Interrater Reliability | Content Validity | Construct Validity | Discriminant/Divergent Validity | Convergent Validity | Predictive Validity | Factor Analysis/Principal Component | Confirmatory Factor Analysis | Structural Equation Modeling | Control/Correlation with Social Desirability | Other Advanced Statistics | Other Biased Responding or Lie Scale | Total Psychometric Assessments |
|----------------------------------------------------------------------------|---------------------------|-------------|---------------------------------------------------------------------------------------------------------------------------------------|-------------------------------------------------------------------------------|------------------------------------------------------------------------------------------------------------------------|----------------------|--------------------------|------------------------|------------------|--------------------|---------------------------------|---------------------|---------------------|-------------------------------------|------------------------------|------------------------------|----------------------------------------------|---------------------------|--------------------------------------|--------------------------------|
| Social Emotional Health Survey Higher Education (SEHS-HE)                  | Furlong et al. (2017)     | Self-Report | 1413 undergraduate students                                                                                                           |                                                                               | Female (64%) Male (36%)                                                                                                | X                    | X                        |                        | X                | X                  |                                 | X                   | X                   |                                     | X                            |                              |                                              | X                         |                                      | 8                              |
| Social-Emotional Responding Task (SEIRT)                                   | Malti et al. (2021)       | Self-Report | sample 1: 291 children; sample 2: 282 children                                                                                        | sample 1: M=6.55, SD=2.02; sample 2: M=6.57, SD=1.56                          | sample 1: 50% boys, sample 2: 40% boys                                                                                 |                      |                          | X                      |                  |                    | X                               | X                   |                     | X                                   | X                            | X                            |                                              |                           |                                      | 7                              |
| Social Issues Advocacy Scale (SIAS)                                        | Nilsson et al. (2011)     | Self-Report | 278 undergraduate and graduate students and professionals (Study 1), 509 undergraduate and graduate students (Study 2) (N=787)        |                                                                               | Female (78%) Male (22%)<br>study 2: Female (76%) Male (23.2%) Other (0.8%)                                             | X                    | X                        |                        |                  | X                  | X                               | X                   |                     | X                                   |                              |                              |                                              | X                         |                                      | 7                              |
| Social Justice and Empathy Assessment (SJEAE)                              | Vaffis et al. (2021)      | Self-Report | 404 PharmD students                                                                                                                   |                                                                               | Private university: M = 26.7, SD = 5; Public university: M = 24.7, SD = 3.4                                            | X                    | X                        |                        | X                | X                  |                                 |                     | X                   | X                                   |                              |                              |                                              |                           |                                      | 6                              |
| Social Relations Survey (SRS)                                              | Lorr et al. (1991)        | Self-Report | 409 high school and undergraduate students                                                                                            |                                                                               | Female (50%) Male (50%)                                                                                                |                      |                          |                        |                  | X                  |                                 |                     |                     | X                                   |                              |                              |                                              |                           |                                      | 2                              |
| Social Self-Compassion Scale (SSCS)                                        | Rose & Kocovski (2021)    | Self-Report | 221 undergraduate participants                                                                                                        | M=19.5                                                                        | 142 women, 79 men                                                                                                      | X                    |                          |                        |                  | X                  | X                               | X                   | X                   | X                                   | X                            | X                            |                                              |                           |                                      | 8                              |
|                                                                            | Rose & Kocovski (2020)    | Self-Report | 221 adults (Sample 1), 227 adults (Sample 2), 271 adults (Sample 3) (N=719)                                                           |                                                                               | Female (72.5%) Male (27.5%)                                                                                            | X                    |                          |                        |                  | X                  | X                               | X                   | X                   | X                                   | X                            | X                            |                                              |                           |                                      | 5                              |
| Social Skills Improvement System (SSIS)                                    | Panayiotou et al. (2022)  | Self-Report | 3331 children                                                                                                                         |                                                                               | 8-10 male; n = 1,720, 51.6%                                                                                            |                      |                          |                        |                  |                    | X                               |                     |                     | X                                   | X                            | X                            |                                              |                           |                                      | 3                              |
| Spatial Perspective Task (SPT)                                             | Chiu & Yeh (2018)         | Self-Report | 158 undergraduate students                                                                                                            |                                                                               | Female (57%) Male (43%)                                                                                                |                      |                          |                        |                  |                    |                                 | X                   |                     |                                     |                              |                              |                                              |                           |                                      | 1                              |
| Spiritual Modeling Inventory of Life Environments (SMILE)                  | Oman et al. (2009)        | Self-Report | 1010 undergraduate students                                                                                                           |                                                                               | Female (71.5%) Male (28.5%)                                                                                            | X                    | X                        |                        |                  | X                  | X                               | X                   |                     |                                     |                              |                              |                                              | X                         |                                      | 2                              |
| Sports Injury Clinic Athlete Satisfaction Scale (SICASS)                   | Taylor & May (1995)       | Self-Report | 160 patients from five sports injury clinics in the UK                                                                                |                                                                               | Female (37%) Male (63%)                                                                                                | X                    |                          |                        |                  | X                  |                                 |                     |                     |                                     |                              |                              |                                              |                           |                                      | 6                              |
| Staff Attitudes Towards Patients who Attempt Suicide (Unimed)              | Aish et al. (2002)        | Self-Report | 1010 medical staff members                                                                                                            |                                                                               | Female (71.8%) Male (28.2%)                                                                                            |                      |                          |                        |                  |                    |                                 |                     |                     | X                                   |                              | X                            |                                              |                           |                                      | 2                              |
| Standardized Assessment of Severity of Personality Disorder (SASPD)        | Waugh et al. (2021)       | Self-Report | 25 graduate students and PhD-Level psychologists                                                                                      | M = 29.36, SD = 8.23                                                          | not indicated                                                                                                          |                      |                          | X                      | X                |                    |                                 |                     |                     |                                     |                              |                              |                                              |                           |                                      | 2                              |
| State-Empathy Concern Scale                                                | Johnson et al. (2019)     | Self-Report | 199 counseling students                                                                                                               | R: 22.69, M = 32.04                                                           | Female (81.4%) Male (18.6%)                                                                                            | X                    |                          |                        | X                | X                  | X                               | X                   |                     |                                     | X                            |                              |                                              |                           |                                      | 6                              |
| State Empathy Scale                                                        | Shen (2010)               | Self-Report | 289 undergraduate students in speech communication classes (Study 1), 189 adults (Study 2) (N=478)                                    |                                                                               | N/A                                                                                                                    | X                    |                          |                        |                  | X                  | X                               | X                   |                     |                                     |                              |                              |                                              |                           |                                      | 4                              |
| State-Interpersonal Reactivity Index (S-IRI)                               | Johnson et al. (2021)     | Self-Report | 240 mental health professionals and graduate-level trainees                                                                           | M=31.18, SD=10.45                                                             | 75.4% female, 8.8% male, 1.3% other                                                                                    | X                    |                          |                        | X                | X                  | X                               | X                   |                     | X                                   | X                            |                              |                                              |                           |                                      | 7                              |
| State Moral Elevation Scale (SMES)                                         | McGuire et al. (2022)     | Self-Report | 930 adult participants                                                                                                                | M=39.27, SD=11.98                                                             | 55.38% male, 44.52% female                                                                                             | X                    |                          |                        | X                | X                  | X                               | X                   |                     | X                                   | X                            | X                            |                                              |                           |                                      | 8                              |
| State Self-Compassion Scale-Long (SSCS-L)                                  | Neff et al. (2021)        | Self-Report | study 1: 588 participants; study 2: 411 participants; study 3: 139 participants                                                       | study 1: M=35.2, SD 10.1; study 2: M=20.6, SD=1.96; study 3: M=20.49, SD=1.81 | study 1: 58% male, 40.8% female; study 2: 31.1% male, 67.2% female; study 3: 36.7% male, 62.6% female                  | X                    |                          |                        |                  |                    |                                 | X                   | X                   | X                                   | X                            | X                            |                                              |                           |                                      | 5                              |
| State Self-Compassion Scale-Short Form (SSCS-S)                            | Neff et al. (2021)        | Self-Report | study 1: 588 participants; study 2: 411 participants; study 3: 139 participants                                                       | study 1: M=35.2, SD 10.1; study 2: M=20.6, SD=1.96; study 3: M=20.49, SD=1.81 | study 1: 58% male, 40.6% female; study 2: 31.1% male, 67.2% female; study 3: 36.7% male, 62.6% female                  | X                    |                          |                        |                  |                    |                                 | X                   | X                   | X                                   | X                            | X                            |                                              |                           |                                      | 5                              |
| State-Trait Scales for Distinct Positive Emotions (STS-DPE)                | Weidman & Tracy (2020)    | Self-Report | study 1 = 150 participants; study 2 = 1372 participants; study 3 = 1962 participants                                                  | study 1: M = 20.4, SD= 2.47; study 3: M = 22.25                               | study 1: 85% women; study 2: 72% women; 77% women                                                                      |                      |                          | X                      | X                | X                  | X                               | X                   |                     | X                                   |                              |                              |                                              |                           |                                      | 5                              |
| Suicidal Patients Scale (USP Scale)                                        | Aish et al. (2002)        | Self-Report | 1010 medical staff members                                                                                                            |                                                                               | Female (71.8%) Male (28.2%)                                                                                            |                      |                          |                        |                  |                    |                                 |                     |                     |                                     | X                            | X                            |                                              |                           |                                      | 2                              |
| Suicide Attitude Vignette Experience (SAVE) Scale                          | Stillion et al. (1984)    | Self-Report | 198 high school students                                                                                                              | M = 18.2                                                                      | N/A                                                                                                                    | X                    | X                        |                        | X                |                    |                                 | X                   |                     |                                     |                              |                              |                                              |                           |                                      | 3                              |
| Sullivan Scale of Social Interest (SSSI)                                   | Watkins & St. John (1994) | Self-Report | 207 undergraduate students                                                                                                            |                                                                               | Female (48%) Male (52%)                                                                                                | X                    |                          |                        | X                |                    |                                 | X                   |                     |                                     |                              |                              |                                              |                           |                                      | 2                              |
| Sussex-Oxford Compassion for Others Scale (SOCOS-O)                        | Gu et al. (2020)          | Self-Report |                                                                                                                                       |                                                                               | Female (79.6%) Male (20.4%)                                                                                            | X                    |                          |                        | X                | X                  | X                               | X                   |                     |                                     | X                            |                              |                                              |                           |                                      | 6                              |
| Sussex-Oxford Compassion for the Self Scale (SOCOS-S)                      |                           | Self-Report |                                                                                                                                       |                                                                               |                                                                                                                        |                      |                          |                        |                  |                    |                                 |                     |                     |                                     |                              |                              |                                              |                           |                                      | 0                              |
| Systemizing Quotient - Child (SQ-C)                                        | Auyeung et al. (2009)     | Self-Report | 1256 parents of typically developing children                                                                                         |                                                                               | N/A                                                                                                                    | X                    | X                        |                        |                  |                    |                                 |                     |                     |                                     |                              |                              |                                              |                           |                                      | 2                              |
| Test of Accurate Perception of Patients' Affect (TAPPA)                    | Hall et al. (2014)        | Self-Report | 524 undergraduate students, nursing students, medical students, and internal medicine residents                                       | M = 24.25                                                                     | Female (81.7%) Male (38.3%)                                                                                            | X                    | X                        |                        |                  | X                  | X                               |                     |                     |                                     |                              |                              |                                              |                           |                                      | 4                              |
| Test of Self-Conscious Affect - Adolescent (TOSCA-A)                       | Watson et al. (2016)      | Self-Report | 931 children and adolescents                                                                                                          |                                                                               | Female (73.8%) Male (26.2%)                                                                                            | X                    |                          |                        | X                |                    |                                 | X                   |                     |                                     | X                            |                              |                                              |                           |                                      | 4                              |
| Therapeutic Environment Scales (TESS)                                      | Veale et al. (2016)       | Self-Report | 61 British patients in treatment for anxiety disorders                                                                                |                                                                               | Female (88%) Male (32%)                                                                                                | X                    | X                        |                        |                  |                    |                                 | X                   |                     |                                     |                              |                              |                                              |                           |                                      | 3                              |
| Thought Impact Scale (TIS)                                                 | Palsson (2020)            | Self-Report | 216 university staff, students, and faculty                                                                                           |                                                                               | Female (81.9%) Male (28.1%)                                                                                            | X                    | X                        |                        |                  | X                  |                                 | X                   |                     |                                     |                              |                              |                                              |                           |                                      | 5                              |
| Tool to Assess Inpatient Satisfaction with Care from Hospitalists (TAISCH) | Torok et al. (2014)       | Self-Report | 203 hospitalized patients                                                                                                             | M = 60                                                                        | Female (56%) Male (44%)                                                                                                |                      |                          |                        |                  |                    |                                 | X                   | X                   |                                     | X                            |                              |                                              | X                         |                                      | 2                              |
| Toronto Empathy Questionnaire (TEQ)                                        | Spreng et al. (2009)      | Self-Report | 200 Canadian female undergraduate students (Study 1), 79 Canadian undergraduate students (Study 2) (N=279)                            | Study 1: M = 18.8 years, SD = 1.2; Study 2: M = 18.9 years, SD = 3.0          | Study 1: Female (50%) Male (50%)<br>Study 2: Female (69.6%) Male (30.4%)                                               | X                    | X                        |                        |                  | X                  | X                               | X                   |                     |                                     |                              |                              |                                              | X                         |                                      | 7                              |
| Trait Emotional Intelligence Questionnaire Short Form (TEIQue-SF)          | Snowden et al. (2015)     | Self-Report | 938 nursing and computing students                                                                                                    |                                                                               | Female (83.7%) Male (16.9%) Other (4%)                                                                                 |                      |                          |                        |                  | X                  | X                               | X                   |                     | X                                   | X                            |                              |                                              | X                         |                                      | 4                              |
| Trait Sympathy Scales (TSS)                                                | Lee (2009)                | Self-Report | 732 undergraduate and graduate students (Study 1), 272 undergraduate students (Study 2), 77 undergraduate students (Study 3) (N=1081) |                                                                               | Study 1: Female (69.4%) Male (30.3%)<br>Study 2: Female (76.6%) Male (23.4%)<br>Study 3: Female 37.1, Male 62.9        | X                    |                          |                        | X                | X                  | X                               | X                   | X                   | X                                   | X                            | X                            |                                              | X                         |                                      | 9                              |
| Transactional Analysis Ego States                                          | Williams et al. (1983)    | Self-Report | 105 undergraduate students (Study 1), 80 undergraduate students (Study 2), 68 undergraduate students (Study 3) (N=253)                |                                                                               | Study 1: Female (50%) Male (50%)<br>Study 2: Female (57.1%) Male (42.9%)<br>Study 3: Female 45.6%, Male 54.4%          |                      |                          |                        | X                |                    |                                 |                     |                     | X                                   |                              |                              |                                              |                           |                                      | 2                              |
| Transpersonal Gratitude Scale                                              | Eifers et al. (2014)      | Self-Report | 314 adults (Study 1), 385 adults (Study 2) (N=699)                                                                                    |                                                                               | Study 1: Female (71.3%) Male (28.7%)<br>Study 2: Female (67.1%) Male (32.9%)<br>Female (87%) Male (11.9%) Other (0.6%) | X                    |                          |                        | X                |                    |                                 |                     |                     | X                                   | X                            |                              |                                              |                           |                                      | 4                              |
| Trauma-Informed Self-Care Measure                                          | Salloum et al. (2018)     | Self-Report | 177 child welfare workers                                                                                                             |                                                                               | sample 1: M=35.9, SD=12.5; sample 2: M=34.78, SD=11.6                                                                  | X                    |                          |                        |                  | X                  |                                 |                     |                     | X                                   | X                            |                              |                                              |                           |                                      | 4                              |
| Trauma-Related Shame Inventory - Short Form (TRSI-SF)                      | Grau et al. (2022)        | Self-Report | sample 1: 228 patients who voluntarily sought treatment; sample 2: 199                                                                |                                                                               | sample 1: 86% female, sample 2: 85% female                                                                             | X                    |                          |                        |                  | X                  | X                               | X                   |                     | X                                   | X                            |                              |                                              |                           |                                      | 6                              |
| Twelve Step Facilitation Adherence Competence Empathy Scale (TSFACES)      | Campbell et al. (2013)    | Self-Report | 471 outpatients diagnosed with a substance use disorder                                                                               |                                                                               | Female (59%) Male (41%)                                                                                                | X                    |                          |                        | X                |                    |                                 | X                   |                     |                                     |                              |                              |                                              |                           |                                      | 3                              |
| Unconditional Self-Kindness Scale                                          | Smith et al. (2018)       | Self-Report | 1452 undergraduate students                                                                                                           | 18+                                                                           | Female (68.8%) Male (31%)                                                                                              | X                    | X                        |                        |                  | X                  | X                               | X                   |                     | X                                   | X                            |                              |                                              |                           |                                      | 7                              |
| Undergraduate Nursing Palliative Care Knowledge Survey (UNPKCS)            | Davis et al. (2020)       | Self-Report | Phase II: 20<br>Phase IV: 262<br>345 adults (Study 1), 345 adults (Study 2), 133 undergraduate students (Study 3) (N=622)             |                                                                               | phase ii: NA<br>phase iv: female (88.5%), male (11.4), other (0.40)                                                    | X                    |                          |                        |                  |                    |                                 |                     |                     | X                                   |                              |                              |                                              |                           |                                      | 2                              |
| Universal Worth Scale (UWS)                                                | Rouse (2012)              | Self-Report |                                                                                                                                       |                                                                               |                                                                                                                        |                      | X                        |                        |                  | X                  |                                 | X                   |                     | X                                   |                              |                              | X                                            |                           |                                      | 5                              |
| Verona Coding Definitions of Emotional Sequences (VR-CoDES)                | Del Piccolo et al. (2011) | Self-Report | 104 healthcare providers                                                                                                              |                                                                               | Female (42.5%) Male (37.5%)                                                                                            |                      | X                        |                        |                  |                    |                                 |                     |                     | X                                   |                              |                              |                                              |                           |                                      | 2                              |

| Instrument                                               | Reference                | Study Type  | Study Population                                                                                           | Age (range [R] and/or Mean [M] with Standard Deviation [SD]) | Gender                                          | Internal Consistency | Test Re-Test Reliability | Interrater Reliability | Content Validity | Construct Validity | Discriminant/Divergent Validity | Convergent Validity | Predictive Validity | Factor Analysis/Principal Component | Confirmatory Factor Analysis | Structural Equation Modeling | Control/Correlation with Social Desirability | Other Advanced Statistics | Other Biased or Lie Scale | Total Psychometric Assessments |
|----------------------------------------------------------|--------------------------|-------------|------------------------------------------------------------------------------------------------------------|--------------------------------------------------------------|-------------------------------------------------|----------------------|--------------------------|------------------------|------------------|--------------------|---------------------------------|---------------------|---------------------|-------------------------------------|------------------------------|------------------------------|----------------------------------------------|---------------------------|---------------------------|--------------------------------|
| Vicarious Posttraumatic Growth Inventory (VPTGI)         | Deaton & Oht (2023)      | Self-Report | 651 helping professionals and helping professionals-in-training working with clients impacted by trauma    | M=39.6, SD=10.95                                             | 90.2% women                                     | X                    |                          |                        |                  | X                  | X                               | X                   |                     | X                                   |                              | X                            |                                              |                           |                           | 6                              |
| Vicarious Resilience Scale (VRS)                         | Killian et al. (2017)    | Self-Report | 190 helping professionals working with severe trauma                                                       | M = 44.43, SD = 12.5                                         | Female (72%) Male (28%)                         | X                    |                          |                        |                  |                    |                                 |                     |                     | X                                   |                              |                              |                                              |                           |                           | 2                              |
| Vicarious Trauma Organizational Readiness Guide (VT-ORG) | Hallinan et al. (2019)   | Self-Report | 3018 employees of first responder agencies and victim assistance agencies                                  |                                                              | Female (28.9%) Male (65.1%) Other (6%)          | X                    |                          |                        |                  |                    |                                 |                     |                     |                                     | X                            | X                            |                                              | X                         |                           | 4                              |
| Vicarious Trauma Scale (VTS)                             | Aparicio et al. (2013)   | Self-Report | 157 social workers                                                                                         |                                                              |                                                 | X                    |                          |                        |                  |                    |                                 |                     |                     | X                                   | X                            |                              |                                              | X                         |                           | 4                              |
| Victim Concern Scale (VCS)                               | Clements et al. (2006)   | Self-Report | 219 undergraduate students                                                                                 | R: 18-36                                                     | Female (54%) Male (46%)                         | X                    |                          |                        | X                |                    |                                 |                     |                     | X                                   |                              |                              |                                              |                           |                           | 3                              |
| Victim Empathy Response Assessment (VERA)                | Terry et al. (2009)      | Self-Report | 103 adult males                                                                                            | R: 16-70, M = 33.71, SD = 15.25                              | Female (0%) Male (100%)                         |                      |                          |                        |                  | X                  |                                 |                     |                     | X                                   |                              |                              |                                              |                           |                           | 2                              |
| Visual CARE Measure                                      | Murphy et al. (2013)     | Self-Report | 99 patients attending routine appointments in a GP practice                                                |                                                              | N/a                                             | X                    |                          |                        |                  |                    |                                 |                     |                     |                                     |                              |                              |                                              |                           |                           | 1                              |
| Working Alliance Inventory - General Practice (WAI-GP)   | Hunik et al. (2021)      | Self-Report | 146 patients                                                                                               | 52.1% were aged older than 45 years                          | 62.3% female                                    | X                    |                          |                        |                  | X                  |                                 | X                   |                     | X                                   |                              |                              |                                              |                           |                           | 4                              |
| Workplace Compassion Scale                               | Mandliya & Pandey (2023) | Self-Report | 406 adults                                                                                                 | 18-60; average age was 30.91 years (SD = 7.3)                | 198 (48.8%) were male, 207 (51.1%) were females | X                    |                          |                        | X                |                    | X                               | X                   | X                   | X                                   | X                            |                              |                                              |                           |                           | 7                              |
| Young Children's Empathy Measure (YCEM)                  | Poresky (1990)           | Self-Report | 38 children                                                                                                |                                                              | Female (55%) Male (45%)                         | X                    |                          | X                      |                  | X                  | X                               | X                   |                     |                                     |                              |                              |                                              |                           |                           | 5                              |
| Youth Suicide Scale (YSS)                                | Range et al. (1987)      | Self-Report | 191 undergraduate psychology students (Sample 1), 152 undergraduate psychology students (Sample 2) (N=343) |                                                              | N/a                                             |                      | X                        |                        |                  |                    |                                 |                     |                     | X                                   |                              |                              |                                              |                           |                           | 2                              |

S1 Table. Measure populations and psychometric assessments. S1 Table includes all compassion and empathy measures identified categorized by type (behavior/expert coder, peer/corollary report, self-report), then sorted alphabetically by measure name, and for measures with more than one articles, from newest to oldest.
