# Supplementary material for: Measures of empathy and compassion: A scoping review
Source: PubMed Central journal article supplement (PMC10798632; doi:10.1371/journal.pone.0297099), 2024-01-19
Supplement: pone.0297099.s002.pdf [file pone.0297099.s002.pdf]

| Instrument                                                                     | Internal Consistency | Test Re-Test Reliability | Interrater Reliability | Content Validity | Construct Validity | Discriminant/Divergent Validity | Convergent Validity | Predictive Validity | Factor Analysis/Principal Component Analysis | Confirmatory Factor Analysis | Structural Equation Modeling | Control/Correlation with Social Desirability | Other Advanced Statistics | Other Biased Responding or Lie Scale | Total Psychometric Assessments |
|--------------------------------------------------------------------------------|----------------------|--------------------------|------------------------|------------------|--------------------|---------------------------------|---------------------|---------------------|----------------------------------------------|------------------------------|------------------------------|----------------------------------------------|---------------------------|--------------------------------------|--------------------------------|
| Interpersonal Reactivity Index (IRI)                                           | X                    | X                        | N/A                    | X                | X                  | X                               | X                   | X                   | X                                            | X                            | X                            | X                                            | X                         |                                      | 12                             |
| Self-Compassion Scale (SCS)                                                    | X                    | X                        | N/A                    | X                | X                  | X                               | X                   | X                   | X                                            | X                            | X                            | X                                            | X                         |                                      | 12                             |
| Body Compassion Questionnaire (BCQ)                                            | X                    | X                        | X                      | X                | X                  | X                               | X                   | X                   | X                                            | X                            | X                            | X                                            | X                         |                                      | 10                             |
| Compassion Scale (CS)                                                          | X                    | X                        | N/A                    | X                | X                  | X                               | X                   |                     | X                                            | X                            | X                            | X                                            |                           |                                      | 10                             |
| Complementary Measure of Psychotherapy Measure (COMPO)                         | X                    | X                        | N/A                    | X                | X                  | X                               | X                   | X                   | X                                            | X                            | X                            |                                              |                           |                                      | 10                             |
| Empathy Quotient (EQ)                                                          | X                    | X                        | N/A                    | X                | X                  | X                               | X                   | X                   | X                                            | X                            |                              | X                                            | X                         |                                      | 10                             |
| Four-Item Mentalising Index                                                    | X                    | X                        | N/A                    | X                | X                  | X                               | X                   | X                   | X                                            | X                            | X                            |                                              |                           |                                      | 10                             |
| Genuine Happiness Scale (GHS)                                                  | X                    | X                        | N/A                    | X                | X                  | X                               | X                   | X                   | X                                            | X                            | X                            |                                              |                           |                                      | 10                             |
| Jefferson Scale of Physician Empathy (JSPE)                                    | X                    | X                        | N/A                    | X                | X                  | X                               | X                   | X                   | X                                            | X                            | X                            |                                              | X                         |                                      | 10                             |
| Moral Foundations Questionnaire (MFQ)                                          | X                    | X                        | N/A                    | X                | X                  | X                               | X                   | X                   | X                                            | X                            | X                            |                                              |                           |                                      | 10                             |
| Prejudice Confrontation Styles (PCS) Scale                                     | X                    | X                        | N/A                    | X                | X                  | X                               | X                   | X                   | X                                            | X                            | X                            |                                              |                           |                                      | 10                             |
| Questionnaire of Cognitive and Affective Empathy (QCAE)                        | X                    |                          | X                      | X                | X                  | X                               | X                   | X                   | X                                            | X                            | X                            |                                              | X                         |                                      | 10                             |
| 18-item short form Coping with Children's Negative Emotions Scale (CCNES)      | X                    | X                        | N/A                    | X                | X                  | X                               | X                   | X                   | X                                            | X                            | X                            |                                              | X                         |                                      | 9                              |
| 6-item brief short form Coping with Children's Negative Emotions Scale (CCNES) | X                    | X                        | N/A                    | X                | X                  | X                               | X                   | X                   | X                                            | X                            | X                            |                                              | X                         |                                      | 9                              |
| Arble Estimate of Selfobject Pursuits (AESOP)                                  | X                    |                          | N/A                    | X                | X                  | X                               | X                   |                     | X                                            | X                            |                              | X                                            | X                         |                                      | 9                              |
| Attitudes Related to Trauma-Informed Care Scale (ARTIC)                        | X                    | X                        | N/A                    | X                | X                  | X                               | X                   | X                   | X                                            | X                            |                              |                                              |                           |                                      | 9                              |
| Bolton Compassion Strengths Indicators (BCSIs)                                 | X                    | X                        | N/A                    | X                | X                  | X                               | X                   | X                   | X                                            | X                            |                              |                                              |                           |                                      | 9                              |
| Child-Related Values Survey (CRVS)                                             | X                    |                          | N/A                    | X                | X                  | X                               | X                   | X                   | X                                            | X                            | X                            | X                                            |                           | X                                    | 9                              |
| Compassionate Love Scale for Humanity - Short Form (CLS-H-SF)                  | X                    |                          | N/A                    | X                | X                  | X                               | X                   |                     | X                                            | X                            |                              | X                                            | X                         |                                      | 9                              |
| Defending Behaviors Scale (DBS)                                                | X                    | X                        | N/A                    | X                | X                  | X                               | X                   | X                   | X                                            | X                            | X                            |                                              |                           |                                      | 9                              |
| ECRC Altruism Scale                                                            | X                    |                          | N/A                    | X                | X                  | X                               | X                   | X                   | X                                            | X                            | X                            |                                              |                           |                                      | 9                              |
| Empathetic Care Scale (ECS)                                                    |                      | X                        | N/A                    | X                | X                  | X                               | X                   | X                   | X                                            | X                            |                              | X                                            | X                         |                                      | 9                              |
| Empathic Experience Scale (EES)                                                | X                    |                          | N/A                    | X                | X                  | X                               | X                   | X                   | X                                            | X                            | X                            | X                                            |                           |                                      | 9                              |
| Essential Properties of Yoga Questionnaire (EPYQ)                              | X                    | X                        | X                      | X                | X                  | X                               | X                   |                     | X                                            | X                            |                              |                                              |                           |                                      | 9                              |
| Fat Attitudes Assessment Toolkit (FAAT)                                        | X                    | X                        | N/A                    | X                | X                  | X                               | X                   |                     | X                                            | X                            |                              | X                                            |                           |                                      | 9                              |
| Fears of Compassion in Sport Scale (FCSS)                                      | X                    | X                        | N/A                    | X                | X                  | X                               | X                   | X                   | X                                            | X                            |                              |                                              |                           |                                      | 9                              |
| Measure of Relational Climate [Unnamed]                                        | X                    |                          | N/A                    | X                | X                  | X                               | X                   |                     | X                                            | X                            | X                            |                                              |                           | X                                    | 9                              |
| Mindful Attention Awareness Scale (MAAS)                                       | X                    | X                        | N/A                    | X                | X                  | X                               | X                   |                     | X                                            | X                            | X                            |                                              | X                         |                                      | 9                              |
| Multiple Mini-Interview (MMI)                                                  | X                    |                          | X                      | X                | X                  | X                               | X                   | X                   | X                                            |                              |                              |                                              | X                         |                                      | 9                              |
| Observed Mindfulness Measure (OMM)                                             | X                    | X                        | X                      | X                | X                  | X                               | X                   |                     | X                                            | X                            |                              |                                              |                           |                                      | 9                              |
| Prosocial and Antisocial Behavior in Sport Scale (PABSS)                       | X                    | X                        | N/A                    | X                | X                  | X                               | X                   |                     | X                                            | X                            |                              |                                              | X                         |                                      | 9                              |
| Reading the Mind in the Eyes Test (RMET)                                       | X                    |                          | X                      | X                | X                  | X                               | X                   | X                   | X                                            | X                            | X                            |                                              |                           |                                      | 9                              |
| Self-Compassion Scale - Short Form (SCS-SF)                                    | X                    | X                        | N/A                    | X                | X                  | X                               | X                   |                     | X                                            | X                            | X                            |                                              | X                         |                                      | 9                              |
| Trait Sympathy Scales (TSS)                                                    | X                    |                          | N/A                    | X                | X                  | X                               | X                   | X                   | X                                            | X                            |                              | X                                            |                           |                                      | 9                              |
| 15-item Mutualism Scale                                                        | X                    | X                        | N/A                    | X                | X                  | X                               | X                   | X                   | X                                            | X                            | X                            |                                              |                           |                                      | 8                              |
| Accountability Scale                                                           | X                    | X                        | N/A                    | X                | X                  | X                               | X                   |                     | X                                            | X                            | X                            |                                              |                           |                                      | 8                              |
| Active Empathetic Listening (AEL) Scale                                        | X                    |                          | N/A                    | X                | X                  | X                               | X                   |                     | X                                            | X                            | X                            |                                              | X                         |                                      | 8                              |
| Awareness, Knowledge, Skills - General (ASK-G)                                 | X                    |                          | N/A                    | X                | X                  | X                               | X                   |                     | X                                            | X                            | X                            |                                              |                           |                                      | 8                              |
| Barrett-Lennard Relationship Inventory Observer Form (BLRI Obs-40)             | X                    | X                        | X                      | X                | X                  | X                               | X                   |                     | X                                            | X                            | X                            |                                              |                           |                                      | 8                              |
| Body Compassion Scale (BCS)                                                    | X                    |                          | N/A                    | X                | X                  | X                               | X                   |                     | X                                            | X                            |                              | X                                            | X                         |                                      | 8                              |
| Consultation and Relational Empathy (CARE) Measure                             | X                    |                          | X                      | X                | X                  | X                               | X                   |                     | X                                            | X                            |                              |                                              | X                         |                                      | 8                              |
| Contingency Management Competence Scale (CMCS)                                 | X                    |                          | X                      | X                | X                  | X                               | X                   | X                   | X                                            |                              |                              |                                              |                           |                                      | 8                              |
| Counselor Behavior Analysis (CBA)                                              | X                    |                          | X                      | X                | X                  | X                               | X                   | X                   |                                              | X                            |                              |                                              |                           |                                      | 8                              |
| Emotional Skills and Competence Questionnaire (ESQ)                            | X                    |                          | N/A                    | X                | X                  | X                               | X                   | X                   | X                                            | X                            |                              |                                              |                           |                                      | 8                              |
| Empathic Counselor Response Scale (ECRS)                                       | X                    |                          | X                      | X                | X                  | X                               | X                   |                     | X                                            | X                            |                              |                                              |                           |                                      | 8                              |
| Empathy for Pain Scale (EPS)                                                   | X                    |                          | N/A                    | X                | X                  | X                               | X                   | X                   | X                                            | X                            |                              |                                              |                           |                                      | 8                              |
| Equanimity Barriers Scale (EBS)                                                | X                    |                          | X                      | X                | X                  | X                               | X                   |                     | X                                            | X                            |                              |                                              |                           |                                      | 8                              |
| Facets of Emotional Experiences in Everyday Life Scale (FEEELS)                | X                    |                          | N/A                    | X                | X                  | X                               | X                   |                     | X                                            | X                            | X                            |                                              |                           |                                      | 8                              |
| Griffith Empathy Measure (GEM)                                                 | X                    | X                        | X                      | X                | X                  | X                               | X                   |                     | X                                            |                              |                              |                                              | X                         |                                      | 8                              |
| Hogan Empathy Scale (HES)                                                      | X                    |                          | X                      | X                | X                  | X                               | X                   |                     | X                                            |                              |                              |                                              |                           |                                      | 8                              |
| Interpersonal Regulation Questionnaire (IRQ)                                   | X                    | X                        | N/A                    | X                | X                  | X                               | X                   | X                   | X                                            |                              |                              | X                                            |                           |                                      | 8                              |
| Level of Personality Functioning Scale - Self Report (LPFS-SR)                 | X                    | X                        | X                      | X                | X                  | X                               | X                   |                     | X                                            |                              |                              |                                              |                           |                                      | 8                              |
| Measure of Expressed Empathy                                                   | X                    |                          | N/A                    | X                | X                  | X                               | X                   | X                   | X                                            |                              | X                            |                                              |                           |                                      | 8                              |
| Millennial Organizational Citizenship Behavior (OCB) Scale                     | X                    |                          | N/A                    | X                | X                  | X                               | X                   |                     | X                                            | X                            | X                            |                                              |                           |                                      | 8                              |
| Moral Inclusion/Exclusion of Other Groups Scale (MIEG)                         | X                    |                          | N/A                    | X                | X                  | X                               | X                   | X                   | X                                            | X                            |                              |                                              |                           |                                      | 8                              |
| Nursing Shared Decision-Making Attitude Scale (NSDMA)                          | X                    |                          | N/A                    | X                | X                  | X                               | X                   |                     | X                                            | X                            | X                            |                                              |                           |                                      | 8                              |
| Physician-Caregiver Relationship Scales (PCRS)                                 | X                    |                          | X                      | X                | X                  | X                               |                     | X                   |                                              | X                            |                              |                                              | X                         |                                      | 8                              |
| Prejudice toward People with Depression (PPD)                                  | X                    |                          | N/A                    | X                | X                  | X                               | X                   |                     | X                                            | X                            | X                            |                                              |                           |                                      | 8                              |
| Prejudice toward People with Schizophrenia (PPS)                               | X                    |                          | N/A                    | X                | X                  | X                               | X                   |                     | X                                            | X                            | X                            |                                              |                           |                                      | 8                              |
| Psychosocial Costs of Racism to Whites Scale (PCRW)                            | X                    |                          | N/A                    | X                | X                  | X                               | X                   |                     | X                                            | X                            |                              | X                                            |                           |                                      | 8                              |
| Relational Care Scale (RCS)                                                    | X                    | X                        | X                      | X                | X                  | X                               | X                   |                     | X                                            |                              |                              |                                              |                           |                                      | 8                              |
| Relational Engagement of the Sacred for a Transgression (REST) Scale           | X                    |                          | N/A                    | X                | X                  |                                 |                     | X                   | X                                            | X                            | X                            | X                                            | X                         |                                      | 8                              |
| School Support Scale                                                           | X                    |                          | N/A                    | X                | X                  | X                               | X                   | X                   | X                                            | X                            |                              |                                              |                           |                                      | 8                              |
| Schwartz Center Compassionate Care Scale (SCCCS)                               | X                    | X                        | N/A                    | X                | X                  | X                               | X                   |                     | X                                            | X                            |                              |                                              | X                         |                                      | 8                              |
| Sinclair Compassion Questionnaire (SCQ)                                        | X                    | X                        | N/A                    | X                | X                  | X                               | X                   |                     | X                                            | X                            |                              |                                              |                           |                                      | 8                              |

| Instrument                                                | Internal Consistency | Test Re-Test Reliability | Interrater Reliability | Content Validity | Construct Validity | Discriminant/Divergent Validity | Convergent Validity | Predictive Validity | Factor Analysis/Principal Component Analysis | Confirmatory Factor Analysis | Structural Equation Modeling | Control/Correlation with Social Desirability | Other Advanced Statistics | Other Biased Responding or Lie Scale | Total Psychometric Assessments |
|-----------------------------------------------------------|----------------------|--------------------------|------------------------|------------------|--------------------|---------------------------------|---------------------|---------------------|----------------------------------------------|------------------------------|------------------------------|----------------------------------------------|---------------------------|--------------------------------------|--------------------------------|
| Social Emotional Health Survey Higher Education (SEHS-HE) | X                    | X                        | N/A                    | X                | X                  |                                 | X                   | X                   |                                              | X                            |                              |                                              | X                         |                                      | 8                              |
| Social Self-Compassion Scale (SSCS)                       | X                    |                          | N/A                    |                  | X                  | X                               | X                   | X                   | X                                            | X                            | X                            |                                              |                           |                                      | 8                              |
| State Moral Elevation Scale (SMES)                        | X                    |                          | N/A                    | X                | X                  | X                               | X                   |                     | X                                            | X                            | X                            |                                              |                           |                                      | 8                              |

**S2 Table. Measures with 8+ psychometric assessments.** S2 Table shows compassion and empathy measures that have more than 8 types of psychometric assessments reported, sorted by measures with the most types of psychometric assessments completed to the least.
