# Supplementary material for: Measures of empathy and compassion: A scoping review
Source: PubMed Central journal article supplement (PMC10798632; doi:10.1371/journal.pone.0297099), 2024-01-19
Supplement: pone.0297099.s003.pdf [file pone.0297099.s003.pdf]

| Instrument                                                                                          | Published Year | Type of Measure       | Subscales/ Forms                                                                                                                                                           | Total Number of Items | Sample Item(s)                                                                                                                                                                                                                                                    | Response set                                                                                                         |
|-----------------------------------------------------------------------------------------------------|----------------|-----------------------|----------------------------------------------------------------------------------------------------------------------------------------------------------------------------|-----------------------|-------------------------------------------------------------------------------------------------------------------------------------------------------------------------------------------------------------------------------------------------------------------|----------------------------------------------------------------------------------------------------------------------|
| (Inner) Strength-Based Inventory (SBI)                                                              | 2020           | Self-Report           | (generosity) (morality)<br>(mindfulness/meditation) (wisdom)<br>(perseverance) (patience and endurance) (truthfulness)<br>(determination) (loving-kindness and equanimity) | 10                    | "I always feel sympathetic for everyone even if I do not like him or her."<br>"Sometimes I react with physical violence."                                                                                                                                         | Each item has its own rating ranging from five to eight choices                                                      |
| 1-Item Brief Burnout Screening [Unnamed]                                                            | 2009           | Self-Report           | No Subscales                                                                                                                                                               | 1                     |                                                                                                                                                                                                                                                                   |                                                                                                                      |
| 10-item Remembered Relationship with Parents (RRP10) Scale                                          | 1958           | Self-Report           | (alienation father) (alienation mother)<br>(control father) (control mother)                                                                                               | 10                    | "Often felt that my mother did not understand me"<br>"Wished mother would worry less about me"                                                                                                                                                                    | five-point Likert scale from 0 (false) to 4 (true)                                                                   |
| 15-item Mutualism Scale                                                                             | 2022           | Self-Report           | (Partner Choice) (Proportional Sharing) (Proportional Punishment)<br>(Proportional Helping)                                                                                | 15                    | "I hold the door open for others"<br>"I help when it helps others much more than it costs me, like holding a door open"                                                                                                                                           | Likert response scale coded from 1 (strongly disagree) to 5 (strongly agree)                                         |
| 18-item short form Coping with Children's Negative Emotions Scale (CCNES)                           | 2002           | Self-Report           | (emotion coaching) (emotion dismissing)                                                                                                                                    | 18                    | "Acknowledge that it can be disappointing to miss out on something you want to do"<br>"Acknowledge that it can feel worrying being separated from you"                                                                                                            | 7-point Likert-type scale (1 = very unlikely, 4 = medium, 7 = very unlikely)                                         |
| 2-Item Brief Burnout Screening [Unnamed]                                                            | 2009           | Self-Report           | (emotional exhaustion)<br>(depersonalization) (physician work-life study)                                                                                                  | 2                     |                                                                                                                                                                                                                                                                   |                                                                                                                      |
| 20-Item Toronto Alexithymia Scale (TAS-20)                                                          | 1994           | Self-Report           | (Difficulty identifying feelings (DIF))<br>(Difficulty describing feelings (DDF))<br>(Externally oriented thinking (EOT))                                                  | 20                    | "I am often confused about what emotion I am feeling"<br>"I prefer talking to people about their daily activities rather than their feelings"                                                                                                                     | 5-point Likert scale (1 = strongly disagree, 5 = strongly agree)                                                     |
| 24-Item Rating Form of Clinical Competence [Unnamed]                                                | 1986           | Peer/Corollary Report | (knowledge and clinical capabilities)<br>(professionalism)                                                                                                                 | 24                    |                                                                                                                                                                                                                                                                   |                                                                                                                      |
| 30-Item Rating Scale of Parent Satisfaction with Pediatric Neuropsychological Evaluations [Unnamed] | 1979           | Self-Report           | (general satisfaction) (clinician acceptance/empathy) (provision of help) (facilities/administrative assistance)                                                           | 30                    | "Made me feel less stressed"<br>"Provided a caring atmosphere"                                                                                                                                                                                                    | 5-point Likert type scale from 1 (strongly disagree) to 5 (strongly agree)                                           |
| 5-item Compassion Measure                                                                           | 2019           | Peer/Corollary Report | No Subscales                                                                                                                                                               | 5                     | "During this emergency department visit, how often do you feel your clinician cared about your emotional or psychological well-being?"<br>"During this emergency department visit, how often do you feel your clinician was interested in you as a whole person?" | 4-point Likert-type scale ranging from 1 (never) to 4 (always)                                                       |
| 6-item brief short form Coping with Children's Negative Emotions Scale (CCNES)                      | 2002           | Self-Report           | (emotion coaching) (emotion dismissing)                                                                                                                                    | 6                     | "Acknowledge that it can feel worrying being separated from you"<br>"encourage my child to talk about his/her nervous feelings of embarrassment (expressive encouragement)."                                                                                      | 7-point Likert-type scale (1 = very unlikely, 4 = medium, 7 = very unlikely)                                         |
| Accountability Scale                                                                                | 2022           | Self-Report           | No Subscales                                                                                                                                                               | 11                    | "I usually welcome being accountable to others"<br>"I am willing to be held responsible for my contributions on tasks"                                                                                                                                            | 1 = disagree strongly; 2 = disagree somewhat; 3 = neither agree nor disagree; 4 = agree somewhat; 5 = agree strongly |
| Actions and Feelings Questionnaire (AFQ)                                                            | 2015           | Self-Report           | (production) (perception)                                                                                                                                                  | 18                    | "I tend to pick up on people's body language"<br>"I wouldn't tend to know what someone was feeling like if they did not say"                                                                                                                                      | 4-point Likert-type scale ranging from 0 (strongly disagree) to 3 (strongly agree)                                   |
| Active Empathetic Listening (AEL) Scale                                                             | 2006           | Self-Report           | (sensing) (processing) (responding)                                                                                                                                        | 45                    | "I understand how others feel."<br>"I assure others that I will remember what they say."                                                                                                                                                                          | 7-point Likert-type scale ranging from 1 (never or almost never true) to 7 (always or almost always true)            |
| Ad Response Empathy (ARE)                                                                           | 2003           | Self-Report           | (response sympathy) (response empathy)                                                                                                                                     | 10                    | "While watching the ad, I experienced feeling as if the events were really happening to me."<br>"While watching the ad, I felt as though I were one of the characters."                                                                                           | 7-point Likert-type scale ranging from 1 to 7                                                                        |
| Ad Response Sympathy (ARS)                                                                          | 2003           | Self-Report           | (response sympathy) (response empathy)                                                                                                                                     | 10                    | "Based on what was happening in the commercial, I understood what the characters were feeling"<br>"Based on what was happening in the commercial, I understood what was bothering the characters."                                                                | 7-point Likert-type scale ranging from 1 to 7                                                                        |
| Adapted Health Communication Assessment Tool© (adapted HCAT©)                                       | 2013           | Peer/Corollary Report | (relationship building) (empowering)<br>(empathy response)                                                                                                                 | 9                     | "Used empathy to build relationship with patient/family"<br>"Inquired about patient's/family's feelings regarding birth, illness, injury and/or treatment"                                                                                                        | Yes, No, Unsure                                                                                                      |
| Adapted SERVQUAL                                                                                    | 2020           | Peer/Corollary Report | (tangibles) (reliability)<br>(responsiveness) (assurance)<br>(empathy) (sanitation and hygiene)                                                                            | 30                    | "Employees in the hospital are always willing to help you."<br>"Employees in the hospital are never too busy to respond to your request."                                                                                                                         | 7-point Likert scale with descriptive anchors ranging from strongly disagree (1) to strongly agree (7)               |
| Adolescent and Adult Mindfulness Scale (AAMS)                                                       | 2018           | Self-Report           | (attention and awareness) (being non-reactive) (being non-judgmental)<br>(being self-acceptant)                                                                            | 19                    | "I tell myself that I shouldn't be feeling the way I'm feeling"<br>"I intentionally stay aware of my feelings."                                                                                                                                                   | 5-point Likert-type scale ranging from 1 (never true) to 5 (always true)                                             |

| Instrument                                                                | Published Year | Type of Measure          | Subscales/ Forms                                                                                                                                                                                                 | Total Number of Items | Sample Item(s)                                                                                                                                                                                                                                                                                                                                                                                                                                                                                        | Response set                                                                                                                           |
|---------------------------------------------------------------------------|----------------|--------------------------|------------------------------------------------------------------------------------------------------------------------------------------------------------------------------------------------------------------|-----------------------|-------------------------------------------------------------------------------------------------------------------------------------------------------------------------------------------------------------------------------------------------------------------------------------------------------------------------------------------------------------------------------------------------------------------------------------------------------------------------------------------------------|----------------------------------------------------------------------------------------------------------------------------------------|
| Adolescent Attitudes towards Dementia Scale (A-ADS)                       | 2017           | Self-Report              | (perceptions of dementia) (personal sacrifice) (empathy with people living with dementia)                                                                                                                        | 23                    | "I would be annoyed if my parents asked me to spend time with a family friend who has dementia rather than see my friends"<br>"I would donate my time or money to help people with dementia"                                                                                                                                                                                                                                                                                                          | 7-point Likert-type scale ranging from 1 (strongly disagree) to 7 (strongly agree)                                                     |
| Adult-Adolescent Parenting Inventory (AAPI)                               | 1984           | Self-Report              | (inappropriate expectations) (lack of empathy) (parental value of corporal punishment) (parent-child role reversal)                                                                                              | 32                    | "Children should be able to feed themselves by twelve months"<br>"Children will quit crying faster if they are ignored"                                                                                                                                                                                                                                                                                                                                                                               | 5-point Likert-type scale ranging from 1 (strongly agree) to 7 (strongly disagree)                                                     |
| Affective and Cognitive Measure of Empathy (ACME)                         | 2016           | Self-Report              | (cognitive empathy) (affective resonance) (affective dissonance)                                                                                                                                                 | 45                    | "I have a hard time reading people's emotions"<br>"I can usually guess what's making someone angry"                                                                                                                                                                                                                                                                                                                                                                                                   | 5-point Likert-type scale ranging from 1 (disagree strongly) to 5 (agree strongly)                                                     |
| Affective Forecasting Situation Questionnaire                             | 2014           | Self-Report              | No Subscales                                                                                                                                                                                                     | 16                    | "I feel more sympathetic toward people who get AIDS from blood transfusions than those who get it from IV drug abuse"<br>"Most people who have AIDS have only themselves to blame"                                                                                                                                                                                                                                                                                                                    | 7-point Likert-type scale ranging from 0 (not at all) to 6 (very strong)                                                               |
| Affective Sensitivity Scale [Unnamed]                                     | 1963           | Behavioural/Expert Coder | No Subscales                                                                                                                                                                                                     | 89                    |                                                                                                                                                                                                                                                                                                                                                                                                                                                                                                       |                                                                                                                                        |
| AIDS Attitude Scale                                                       | 1992           | Self-Report              | (avoidance) (empathy)                                                                                                                                                                                            | 21                    | "I would rather work with a better class of people than AIDS people."<br>"I sometimes find it hard to be sympathetic to AIDS patients."                                                                                                                                                                                                                                                                                                                                                               | 6-point Likert-type scale ranging from 1 (strongly disagree) to 6 (strongly agree)                                                     |
| AIDS Attitude Scale-Generic (AAS-G)                                       | 1992           | Self-Report              | (avoidance) (empathy)                                                                                                                                                                                            | 21                    | "I would rather work with a better class of people than AIDS people."<br>"I sometimes find it hard to be sympathetic to AIDS patients."                                                                                                                                                                                                                                                                                                                                                               | 6-point Likert-type scale ranging from 1 (strongly disagree) to 6 (strongly agree)                                                     |
| Altruism Scale                                                            | 2015           | Peer/Corollary Report    | (altruism) (solidarity)                                                                                                                                                                                          | 22                    |                                                                                                                                                                                                                                                                                                                                                                                                                                                                                                       |                                                                                                                                        |
| Altruism Scale for Children (ASC)                                         | 2020           | Self-Report              | No Subscales                                                                                                                                                                                                     | 30                    | A teacher is walking into the building and drops some things as she attempts to open the door. I: (a) ask my friends if we should offer help, (b) stop and offer to help, or (c) keep walking by."One response reflects an altruistic response (scored with three points), one response focuses on a self-centered response (scored with one point), and the third option ranges in the middle (scored with two points) relating to a reliance on feedback from others in the decision-making process |                                                                                                                                        |
| Analog Task of Prosocial Helping (AToP-H)                                 | 2022           | Behavioural/Expert Coder | (Instrumental helping) (Informative helping) (Empathic helping)                                                                                                                                                  | 9                     | The examiner provided a graduated series of cues to elicit helping. Cues were delivered in a consistent sequence for each item, from subtlest to most explicit.                                                                                                                                                                                                                                                                                                                                       | The examiner provided cues every 4 s until the child provided a response that was consistent with that item's context and helping type |
| Anasakti Scale [Unnamed]                                                  | 1992           | Self-Report              | (outcome vulnerability) (faith in god) (empathy) (frustration tolerance) (effort orientation and emotional equipoise)                                                                                            | 22                    | "I feel remembering God is the perfect solution to all the problems."<br>"I deeply care for people who are suffering and offer my comfort."                                                                                                                                                                                                                                                                                                                                                           | 5-point Likert-type scale ranging from 1 (never) to 5 (always)                                                                         |
| Appreciative Joy Scale (AJS)                                              | 2017           | Self-Report              | (sense of joy) (positive interpersonal bias) (self-transcendence)                                                                                                                                                | 14                    | "I can usually notice many little kind acts performed by my friends"<br>"I would be sincerely happy for my friends' achievements."                                                                                                                                                                                                                                                                                                                                                                    | 9-point Likert-type scale ranging from 1 (not at all like me) to 9 (totally like me)                                                   |
| Arab Muslim Perceptions of Perinatal Loss Care (AMPPLC)                   | 2021           | Self-Report              | No Subscales                                                                                                                                                                                                     | 29                    | "After delivery, I would want to hold my baby who died"<br>"After delivery, I would like an opportunity to bathe my baby who died."                                                                                                                                                                                                                                                                                                                                                                   | 4-point Likert-type scale ranging from strongly agree (4) to strongly disagree (1)                                                     |
| Arble Estimate of Selfobject Pursuits (AESOP)                             | 2017           | Self-Report              | (idealizing) (mirroring) (twinship)                                                                                                                                                                              | 31                    | "I feel that people do not appreciate the struggles I've had to face"<br>"It helps me to be around people going through the same things that I am going through"                                                                                                                                                                                                                                                                                                                                      | 7-point Likert-type scale ranging from 1 (not at all true of me) to 7 (very true of me)                                                |
| ASP ["Expressions of Spirituality"] Questionnaire                         | 2007           | Self-Report              | (prayer, trust in god, and shelter) (insight, awareness, and wisdom) (transcendence conviction) (compassion, generosity, and patience) (conscious interactions) (gratitude, reverence and respect) (equanimity.) | 40                    |                                                                                                                                                                                                                                                                                                                                                                                                                                                                                                       |                                                                                                                                        |
| ASPIRE Coaching Fidelity Checklist (ACFC)                                 | 2020           | Behavioural/Expert Coder | (session structure) (session process) (set goals and monitor progress) (assess and personalize self-regulatory content) (manage the session) (creates a supportive and empathetic climate) (stays on track)      | 192                   | "Organized and prepared"<br>"Delivers didactic material in a matter of fact and friendly way"                                                                                                                                                                                                                                                                                                                                                                                                         | three-point ordinal scale (0 = did not cover/demonstrate; 1 = partially covered/demonstrated; 2 = fully covered/demonstrated)          |
| Assessment of Motivational Interviewing Groups – Observer Scales (AMIGOS) | 2013           | Behavioural/Expert Coder | (group processes) (client-centered style) (mi change focus)                                                                                                                                                      | 18                    |                                                                                                                                                                                                                                                                                                                                                                                                                                                                                                       |                                                                                                                                        |

| Instrument                                                            | Published Year | Type of Measure          | Subscales/ Forms                                                                                                                                                                                                                | Total Number of Items | Sample Item(s)                                                                                                                                                                                                                                                          | Response set                                                                                                                                                                                                                                                                                                        |
|-----------------------------------------------------------------------|----------------|--------------------------|---------------------------------------------------------------------------------------------------------------------------------------------------------------------------------------------------------------------------------|-----------------------|-------------------------------------------------------------------------------------------------------------------------------------------------------------------------------------------------------------------------------------------------------------------------|---------------------------------------------------------------------------------------------------------------------------------------------------------------------------------------------------------------------------------------------------------------------------------------------------------------------|
| Attitudes About Reality Scale (AAR)                                   | 1986           | Self-Report              | (individual determinism) (societal determinism) (variable determinism)                                                                                                                                                          | 40                    | "Effort can often make up for a lack of talent in an area."<br>"The mother-infant relationship a key to understanding later adult development!"<br>"Most people would cooperate with each other if only they understood that everyone would benefit from such behavior" | 7-point Likert-type scale ranging from 1 (disagree almost completely) to 7 (agree almost completely)                                                                                                                                                                                                                |
| Attitudes Related to Trauma-Informed Care Scale (ARTIC)               | 2016           | Self-Report              | (underlying causes of problem behavior and symptoms) (responses to problem behavior and symptoms) (empathy and control) (self-efficacy at work) (reactions to the work) (personal support of TIC) (system-wide support for TIC) | 45                    | "If students don't apologize to me after they act out, I look like a fool in front of others"<br>"I realize that students may not be able to apologize to me after they act out"                                                                                        | 7-point bipolar Likert scale containing a TIC-favorable and a TIC-unfavorable statement                                                                                                                                                                                                                             |
| Attitudes toward Suicidal Patients                                    | 1998           | Self-Report              | (emotional attitudes) (empathic or rejecting) (attitudes toward further training) (attitudes toward the need for psychiatric care)                                                                                              | 100                   | "A patient who has tried to commit suicide usually takes up a great deal of staff time"<br>"Once people have made up their minds to commit suicide, you cannot stop them"                                                                                               |                                                                                                                                                                                                                                                                                                                     |
| Attitudes Toward Women with HIV/AIDS Scale                            | 1995           | Self-Report              | (attitudes toward women with hiv/aids) (female-specific knowledge) (attitudes toward female sexuality)                                                                                                                          | 66                    | "Pregnant women with HIV/AIDS should be forced to have their baby tested for HIV"<br>"Women with HIV/AIDS are unfit mothers."                                                                                                                                           | 5-point Likert-type scale ranging from 1 (strongly agree) to 5 (strongly disagree)                                                                                                                                                                                                                                  |
| Attribution Questionnaire-Substance Use Disorder (AQ-SUD)             | 2021           | Self-Report              | (negative emotions) (assessment of responsibility) (lack of empathy) (social disengagement)                                                                                                                                     | 18                    | "I would feel pity for Derek."<br>"How much sympathy would you feel for Derek?"                                                                                                                                                                                         | 9-point Likert scale from 1 (not at all) to 9 (very likely)                                                                                                                                                                                                                                                         |
| Augmented Stanford Faculty Development Program Questionnaire (SFDQPQ) | 2010           | Peer/Corollary Report    | No Subscales                                                                                                                                                                                                                    | 58                    |                                                                                                                                                                                                                                                                         |                                                                                                                                                                                                                                                                                                                     |
| Awareness, Knowledge, Skills - General (ASK-G)                        | 2022           | Self-Report              | (Knowledge) (Awareness of others) (Proactive skills development) (Awareness of self)                                                                                                                                            | 37                    | "When I make a cultural misstep, I see that moment as a learning opportunity."<br>"When I say something that is offensive to another person, I can apologize even if I do not fully understand how I have offended them."                                               | 6-point Likert-type scale: (1) strongly agree, (2) disagree, (3) slightly disagree, (4) slightly agree, (5) agree, (6) strongly agree                                                                                                                                                                               |
| Barrett-Lennard Relationship Inventory - Empathy (BLRI-E)             | 1962           | Self-Report              | (empathy) (regard) (congruence)                                                                                                                                                                                                 | 16                    | "S/he feels deep affection for me"<br>"I feel that she really values me"                                                                                                                                                                                                | 6-point Likert-type scale ranging from 1 (I strongly feel that is untrue) to 6 (I strongly feel that is true)                                                                                                                                                                                                       |
| Barrett-Lennard Relationship Inventory (BLRI)                         | 1962           | Self-Report              | (level of regard) (advice-giving) (empathy) (unconditionality of regard) (congruence)                                                                                                                                           | 64                    | "S/he feels deep affection for me"<br>"I feel that she really values me"                                                                                                                                                                                                | 6-point Likert-type scale ranging from 1 (I strongly feel that is untrue) to 6 (I strongly feel that is true)                                                                                                                                                                                                       |
| Barrett-Lennard Relationship Inventory for Receiver (B-L RI: OS-64)   | 1962           | Self-Report              | (Level of regard) (Empathic understanding) (Congruence) (Unconditionality of regard)                                                                                                                                            | 64                    | "_____ respects me as a person"<br>"_____ wants to understand how I see things"                                                                                                                                                                                         | six-point Likert scale (-3: NO, I strongly feel that it is not true; -2: No, I feel it is not true; -1: (No) I feel that it is probably untrue, or more untrue than true; +1: (Yes) I feel that it is probably true, or more true than untrue; +2: Yes, I feel it is true; +3: YES, I strongly feel that it is true |
| Barrett-Lennard Relationship Inventory Observer Form (BLRI Obs-40)    | 2015           | Behavioural/Expert Coder | (Empathic Understanding) (Level of Regard) (Unconditionality of Regard) (Congruence)                                                                                                                                            | 40                    | "S/he evidently feels a responsive personal warmth and liking for B"<br>"S/he senses or realizes how B is feeling"                                                                                                                                                      | 6-point Likert-type scale                                                                                                                                                                                                                                                                                           |
| Barriers to Physician Compassion Questionnaire                        | 2014           | Self-Report              | No Subscales                                                                                                                                                                                                                    | 34                    | "Feeling burned out"<br>"Having a limited time for consultations"                                                                                                                                                                                                       | 7-point Likert-type scale ranging from 1 (minimal) to 7 (a great deal)                                                                                                                                                                                                                                              |
| Basic Empathy Scale (BES)                                             | 2004           | Self-Report              | (affective empathy) (cognitive empathy)                                                                                                                                                                                         | 40                    | "My friend's emotions don't affect me much"<br>"I can understand my friend's happiness when she/he does well at something"                                                                                                                                              | 5-point Likert-type scale ranging from 1 (strongly disagree) to 5 (strongly agree)                                                                                                                                                                                                                                  |
| Beech Brook Therapy Assessment Instrument                             | 2002           | Peer/Corollary Report    | No Subscales                                                                                                                                                                                                                    | 9                     |                                                                                                                                                                                                                                                                         |                                                                                                                                                                                                                                                                                                                     |
| Behavior Change Counseling Index (BECCI)                              | 2005           | Peer/Corollary Report    | No Subscales                                                                                                                                                                                                                    | 11                    | "Practitioner invites the patient to talk about behaviour change"<br>"Practitioner demonstrates sensitivity to talking about other issues"                                                                                                                              | 0. Not at all; 1. Minimally; 2. To some extent; 3. A good deal; 4. A great extent                                                                                                                                                                                                                                   |
| Behavioral Assessment of Empathy                                      | 1968           | Behavioural/Expert Coder | (communication of acceptance) (allowing the child self-direction) (involvement)                                                                                                                                                 | 15                    |                                                                                                                                                                                                                                                                         |                                                                                                                                                                                                                                                                                                                     |
| Body Compassion Questionnaire (BCQ)                                   | 2021           | Self-Report              | (body kindness) (common humanity) (motivated action)                                                                                                                                                                            | 23                    | "I like my body in spite of small inadequacies"<br>"I am trying to become more accepting of my body"                                                                                                                                                                    | 5-point Likert-type scale, ranging from "almost never" (1) to "almost always" (5)                                                                                                                                                                                                                                   |
| Body Compassion Scale (BCS)                                           | 2017           | Self-Report              | (defusion) (common humanity) (acceptance)                                                                                                                                                                                       | 23                    | "When I feel frustrated with my body's inability to do something, I tend to feel separate and cut off from other people."<br>"When I am at my lowest during times of physical symptoms, illness, or injury, I know I am not alone in feeling this way."                 | 5-point Likert-type scale ranging from 1 (almost never) to 5 (almost always)                                                                                                                                                                                                                                        |

| Instrument                                                                 | Published Year | Type of Measure          | Subscales/ Forms                                                                                                                                                                | Total Number of Items | Sample Item(s)                                                                                                                                                                                                             | Response set                                                                                                                                   |
|----------------------------------------------------------------------------|----------------|--------------------------|---------------------------------------------------------------------------------------------------------------------------------------------------------------------------------|-----------------------|----------------------------------------------------------------------------------------------------------------------------------------------------------------------------------------------------------------------------|------------------------------------------------------------------------------------------------------------------------------------------------|
| Body Image–Acceptance and Action Questionnaire (BIAAQ)                     | 2013           | Self-Report              | No Subscales                                                                                                                                                                    | 5                     | "Worrying too much about my weight makes it difficult for me to live a life that I value"<br>"To control my life, I need to control my weight."                                                                            | 7-point Likert-type scale ranging from 1 (never true) to 7 (always true)                                                                       |
| Body-Image Contextualized Adaptation of the Self-Compassion Scale (BI-SCS) | 2003           | Self-Report              | (Self-Kindness) (Self-Judgment) (Common Humanity) (Isolation) (Mindfulness) (Over-Identification)                                                                               | 26                    | "I am disapproving and judgmental about my own flaws and inadequacies"<br>"I obsess and fixate on everything that was wrong"                                                                                               | 5-point Likert type scale with anchors "almost never" and "almost always"                                                                      |
| Bolton Compassion Strengths Indicators (BCSIs)                             | 2020           | Self-Report              | (Self-care) (Character) (Empathy) (Connection) (Interpersonal) (Engagement) (Competence) (Communication)                                                                        | 48                    | "I believe in myself no matter what."<br>"Respecting the patient is just as important as the care they receive."                                                                                                           | 1: Definitely not like me, 2: Generally not like me, 3: Slightly not like me, 4: Slightly like me, 5: Generally like me, 6: Definitely like me |
| Breaking Bad News (BBN) Assessment Tool [Unnamed]                          | 2019           | Self-Report              | No Subscales                                                                                                                                                                    | 21                    | "Overall, how would you rate this clinician's communication with you?"<br>"The doctor demonstrated that he or she was able to recognize the impact of this moment on me"                                                   | 5-point Likert-type scale ranging from 1 (strongly disagree) to 5 (agree)                                                                      |
| Brief Assessment of Social Skills - Dementia (BASS-D)                      | 2020           | Self-Report              | (face emotion perception task) (facial identification task) (empathy/theory of mind task) (social disinhibition) (social reasoning task) (memory for familiar faces task)       | 7                     | Multiple different types of tasks with pictures                                                                                                                                                                            | Multiple different types of tasks with pictures                                                                                                |
| Brief Dimensional Apathy Scale (b-DAS)                                     | 2020           | Self-Report              | (executive) (emotional) (initiation)                                                                                                                                            | 9                     | "I struggle to empathise with other people"<br>"I became emotional easily when watching something happy or sad on TV"                                                                                                      | 4-point Likert scale (ranging from 0 to 3)                                                                                                     |
| Brief Patient Satisfaction Scale [Unnamed]                                 | 2011           | Peer/Corollary Report    | No Subscales                                                                                                                                                                    | 10                    | "I am satisfied that my doctor has been taking care of me."<br>"My doctor explains the reason(s) for any medical test."                                                                                                    | 7-point Likert scale (1=strongly disagree, 7=strongly agree)                                                                                   |
| Burnout Measure - Short Version                                            | 1988           | Self-Report              | No Subscales                                                                                                                                                                    | 10                    | Each item is a continuation of the statement "When you think about your work overall, how often in the last month have you felt..."                                                                                        | seven-point Likert scale ranging from "Never" to "Always"                                                                                      |
| Burns-Specific Patient-Reported Experience Measure (PREM) [Unnamed]        | 2019           | Self-Report              | (care) (compassion and dignity) (information and decision making) (the burns team) (involving others) (facilities) (looking after burn)                                         | 23                    | "Feeling care for"<br>"Treated as a whole person"                                                                                                                                                                          | 5-point Likert-type scale ranging from 1 (strongly disagree) to 5 (strongly agree)                                                             |
| Callous-Unemotional Problems and Impairment (CUP)                          | 2006           | Behavioural/Expert Coder | No Subscales                                                                                                                                                                    | 7                     |                                                                                                                                                                                                                            |                                                                                                                                                |
| Calm Compassionate Care Scale (CCCS)                                       | 2006           | Self-Report              | No Subscales                                                                                                                                                                    | 20                    | "I can be peaceful and focused when my body is quiet and still and it is quiet in my environment."<br>"I can extend kindness, peace, and compassion to patients, colleagues, and myself."                                  | 11-point Likert-type scale ranging from 0 (not confident) to 10 (very confident)                                                               |
| Care Receiver View of Caregiver Role Enactment Scale                       | 1985           | Self-Report              | (affection exhibited by the caregiver in providing care) (attentiveness from the caregiver to things important to the care receiver) (skill of the caregiver in providing care) | 12                    | "How often does your family member make sure you have a chance to do social activities that are important to you?"<br>"How often does your family member do special things for you that you count on and look forward to?" | 5-point Likert-type scale ranging from 0 (never) to 4 (always)                                                                                 |
| Caring Assessment for Care Givers                                          | 2011           | Self-Report              | (maintaining belief) (knowing) (being with) (doing for) (enabling/informing)                                                                                                    | 25                    | "I focus on accomplishing the tasks necessary to provide care."<br>"I focus on caring for the whole person (body, mind, spirit) with concentration on facilitating healing."                                               | 5-point Likert-type scale ranging from 1 (highly task oriented) to 4 (high degree of rational orientation)                                     |
| Caring Assessment Tool - Version V (CAT-V)                                 | 2014           | Self-Report              | (nurse–patient communication) (feeling cared for)                                                                                                                               | 27                    | "Feeling cared for"<br>"Treated as an individual"<br>"Treated as a whole person"                                                                                                                                           | 5-point Likert scale ranging from 1 (never) to 5 (always)                                                                                      |
| Caring Assessment Tool (CAT)                                               | 1990           | Self-Report              | (nurse–patient communication) (feeling cared for)                                                                                                                               | 36                    | "Feeling cared for"<br>"Treated as an individual"<br>"Treated as a whole person"                                                                                                                                           | 5-point Likert scale ranging from 1 (never) to 5 (always)                                                                                      |
| Caring Behavior Coding Scheme (CBCS)                                       | 2020           | Self-Report              | (Knowing) (Being with) (Doing for) (Enabling)                                                                                                                                   | 25                    | "Centering on the one being cared for/Believing in or holding in esteem."<br>"Protecting dignity/Offering a hope-filled attitude."                                                                                         |                                                                                                                                                |
| Caring Behaviors Inventory - Short Form (CBI-24)                           | 1994           | Self-Report              | (assurance) (knowledge and skill) (respectful) (connectedness)                                                                                                                  | 24                    | "Treating the patient as an individual"<br>"Attentively listening to the patient"<br>"Supporting the patient"                                                                                                              | 6-point Likert scale ranging from 1 (never) to 6 (always)                                                                                      |
| Caring Behaviors Inventory (CBI)                                           | 1979           | Self-Report              | No Subscales                                                                                                                                                                    | 42                    | "Treating the patient as an individual" "Attentively listening to the patient"<br>"Supporting the patient"                                                                                                                 | 6-point Likert scale ranging from 1 (never) to 6 (always)                                                                                      |
| Caring Culture Survey                                                      | 2015           | Self-Report              | (personal caring) (leadership caring) (coworker caring)                                                                                                                         | 24                    | "I often show empathy and caring to my coworkers"<br>"I feel a lot of empathy toward my patients and their families"                                                                                                       |                                                                                                                                                |
| Caring Dimensions Inventory - 35-Item Version (CDI-35)                     | 1996           | Self-Report              | (intimacy) (technical) (unnecessary) (supporting) (inappropriate)                                                                                                               | 35                    | "Getting to know the patient as a person"<br>"Feeling sorry for a patient"                                                                                                                                                 | 5-point Likert-type scale ranging from 1 (strongly disagree) to 5 (strongly agree)                                                             |

| Instrument                                                                                    | Published Year | Type of Measure       | Subscales/ Forms                                                                                                                                                                   | Total Number of Items | Sample Item(s)                                                                                                                                                                                                                                                           | Response set                                                                                                                                                                                                                                    |
|-----------------------------------------------------------------------------------------------|----------------|-----------------------|------------------------------------------------------------------------------------------------------------------------------------------------------------------------------------|-----------------------|--------------------------------------------------------------------------------------------------------------------------------------------------------------------------------------------------------------------------------------------------------------------------|-------------------------------------------------------------------------------------------------------------------------------------------------------------------------------------------------------------------------------------------------|
| Caring Dimensions Inventory (CDI)                                                             | 1997           | Self-Report           | No Subscales                                                                                                                                                                       | 41                    | "Getting to know the patient as a person"<br>"Feeling sorry for a patient"                                                                                                                                                                                               | 5-point Likert-type scale ranging from 1 (strongly disagree) to 5 (strongly agree)                                                                                                                                                              |
| Caring Efficacy Scale (CES)                                                                   | 1997           | Self-Report           | No Subscales                                                                                                                                                                       | 28                    | "I am able to tune into a particular client/patient and forget my personal concerns"<br>"Even when I really try, I can't get through to difficult clients/patients"                                                                                                      | 6-point, Likert-type self-report scale (strongly disagree -3 to strongly agree +3)                                                                                                                                                              |
| Caring for Bliss Scale                                                                        | 2017           | Self-Report           | No Subscales                                                                                                                                                                       | 4                     | "I search for lasting happiness inside myself, rather than outside of myself"<br>"I listen deeply to my heart"                                                                                                                                                           | respondents were instructed to indicate how often each of the statements were true for them on a 5- point rating scale ranging from 0 (never) to 4 (regularly)                                                                                  |
| Caring Nurse-Patient Interaction - Short Scale (CNPI-Short Scale)                             | 2006           | Peer/Corollary Report | (humanistic care) (relational care) (clinical care) (comforting care)                                                                                                              | 23                    | "Treat them as complete individuals, show that I was interested in more than their health problem"<br>"Show that I will be there for them if they need me."                                                                                                              | 1 to 5 points (almost never = 1, sometimes = 2, often = 3, very often = 4, almost always = 5).                                                                                                                                                  |
| Caring Nurse-Patient Interaction Scale (CNPI)                                                 | 2004           | Peer/Corollary Report | (humanism) (hope) (sensitivity) (helping relationship) (expression of emotions) (problem solving) (teaching) (environment) (needs) (spirituality)                                  | 70                    | "Treat them as complete individuals, show that I was interested in more than their health problem"<br>"Show that I will be there for them if they need me."                                                                                                              | 1 to 5 points (almost never = 1, sometimes = 2, often = 3, very often = 4, almost always = 5).                                                                                                                                                  |
| Caring Scale for Institutionalized Elders                                                     | 2016           | Self-Report           | (being supported physically) (being valued)                                                                                                                                        | 33                    | "Provide services that make me feel cared for"<br>"Respond quickly to my discomfort"                                                                                                                                                                                     | 5-point Likert-type format for frequency of caring, we used hand signals (five fingers = always, four fingers = more than half of the time, three fingers = half of the time, two fingers = less than half of the time, and one finger = never) |
| Carkhuff Scale                                                                                | 1969           | Self-Report           | No Subscales                                                                                                                                                                       | 5                     | Communicating little or no awareness or understanding of the caller's feelings                                                                                                                                                                                           | seven-point scale for degree of empathy                                                                                                                                                                                                         |
| Carolina Opinions on Care of Older Adults (COCOA)                                             | 2007           | Self-Report           | (early interest in geriatrics) (empathy/compassion) (attitudes towards geriatrics careers) (ageism) (clinical and social services for older adults) (social value of older adults) | 24                    | "Caring for patients in nursing homes would be rewarding"<br>"Older adults are valuable contributors to our society."                                                                                                                                                    | Scored on a 1-5 Likert-type (Agreement)                                                                                                                                                                                                         |
| Charge Nurse Support Scale (CNSS)                                                             | 2003           | Peer/Corollary Report | No Subscales                                                                                                                                                                       | 6                     | "My charge nurse recognizes the standards of care I try to deliver."<br>"My charge nurse knows me well enough to know when I have concerns about patient care and tries to understand my point of view."                                                                 | 5-point Likert-type scale ranging from 1 (not at all true) to 5 (always true)                                                                                                                                                                   |
| Child and Adolescent Dispositions Scale (CADS)                                                | 2008           | Peer/Corollary Report | (dispositional sympathy) (prosociality) (negative emotionality) (caring) (respect for rules)                                                                                       | 57                    | "Concerned about others when they are hurt"<br>"Feels sorry for kids who get picked on"                                                                                                                                                                                  | 1. Not at all, 2. Just a little, 3. Pretty much, 4. Very much.                                                                                                                                                                                  |
| Child Care Worker Interview                                                                   | 1985           | Self-Report           | No Subscales                                                                                                                                                                       | 50                    | "Relationship"<br>"Empathy"<br>"Responsibility"                                                                                                                                                                                                                          | a 50-item structured interview consisting of 10 theme sets of five questions each.                                                                                                                                                              |
| Child-Related Values Survey (CRVS)                                                            | 1990           | Self-Report           | (affective valence) (empathic caring) (self-sacrifice) (societies' duties) (instrumentality) (authoritarian attitude)                                                              | 43                    | It hurts me when I see a child's feelings hurt "It makes me feel good to know a child is happy"                                                                                                                                                                          |                                                                                                                                                                                                                                                 |
| Childhood Narcissism Scale (CNS)                                                              | 2008           | Self-Report           | No Subscales                                                                                                                                                                       | 10                    | "These kids feel bad if they see another kid without a friend to play with"<br>"It makes me sad to see a girl who can't find anyone to play with"                                                                                                                        | 4-point Likert-type response scale with 0 = not at all true, 1 = not really true, 2 = sort of true, and 3 = completely true                                                                                                                     |
| Children's Concentration and Empathy Scale (CCES)                                             | 2021           | Peer/Corollary Report | (concentration) (choosing challenging activities) (being happy) (showing empathetic concern) (appreciating beauty) (realistic ventures)                                            | 21                    | "I try to be understanding and patient towards those aspects of my personality I don't like."<br>"When I fail at something important to me I become consumed by feelings of inadequacy."                                                                                 | 5-point scale ("Never/Not at all characteristic of child" to "Always/Very characteristic of child")                                                                                                                                             |
| Clinical Skills Assessment (CSA)                                                              | 2002           | Self-Report           | (interviewing) (counselling) (rapport) (personal manner) (satisfaction)                                                                                                            | 12                    | "Ability to be on his or her way to establishing a caring relationship with a patient"<br>"Attentiveness, body language, including appropriate eye contact and respect of personal space, attitude, and demonstration of empathy and support for the patient's concerns" | 4-point Likert type scale from 1 (poor) to 4 (excellent)                                                                                                                                                                                        |
| Clinician and Group Consumer Assessment of Healthcare Providers and Systems Survey (CG-CAHPS) | 2018           | Self-Report           | No Subscales                                                                                                                                                                       | 5                     | "How often do you feel your provider cares about your emotional or psychological well-being?"<br>"How often do you feel your provider is interested in you as a whole person?"                                                                                           | Responses: 1, Never 2, Sometimes 3, Usually 4, Always                                                                                                                                                                                           |

| Instrument                                                              | Published Year | Type of Measure          | Subscales/ Forms                                                                                                                                                                                | Total Number of Items | Sample Item(s)                                                                                                                                                                                                                    | Response set                                                                                                                                                                                                                                               |
|-------------------------------------------------------------------------|----------------|--------------------------|-------------------------------------------------------------------------------------------------------------------------------------------------------------------------------------------------|-----------------------|-----------------------------------------------------------------------------------------------------------------------------------------------------------------------------------------------------------------------------------|------------------------------------------------------------------------------------------------------------------------------------------------------------------------------------------------------------------------------------------------------------|
| Clinician Associative Stigma Scale (CASS)                               | 2017           | Self-Report              | (negative stereotypes about professional effectiveness) (discomfort with disclosure) (negative stereotypes about people with mental illness) (stereotypes about professionals' mental health)   | 18                    | "I have heard other people say that the work I do is easy/could be done by anyone"<br>"When I have met a new person at a social gathering, I am reluctant to discuss my work with people with serious mental illness"             | report the frequency of experiences on the following scale: 1, if the experience had never occurred; rarely, 2, if it had occurred only once or twice; sometimes, 3, if it had occurred repeatedly but irregularly; and often, 4, if it occurred regularly |
| Cognitive, Affective, and Somatic Empathy Scale (CASES)                 | 2018           | Self-Report              | (positive emotion- cognitive) (positive emotion- affective) (positive emotion- somatic empathy) (negative emotion- cognitive) (negative emotion- affective) (negative emotion- somatic empathy) | 30                    | "Seeing people sad at a funeral would make me feel sad too"<br>"I feel pleased when someone tells me some good news that they had"                                                                                                | 3-point Likert scale from 0 (rarely) to 2 (often)                                                                                                                                                                                                          |
| Collaborative Behaviors Observational Assessment Tool (CBOAT)           | 2020           | Behavioural/Expert Coder | No Subscales                                                                                                                                                                                    | 26                    | "Observed participant covers patient with blanket"<br>"Observed participant shows support to the actor during code verbally."                                                                                                     | Yes or NO                                                                                                                                                                                                                                                  |
| Compassion Competence Scale (CCS)                                       | 2016           | Self-Report              | (Communication) (Sensitivity) (Insight)                                                                                                                                                         | 18                    | "I can show my compassion toward patients through communication with them."<br>"I try to support patients through care that helps them overcome their problems."                                                                  | 5-point Likert scale (1 = strongly disagree to 5 = strongly agree)                                                                                                                                                                                         |
| Compassion Fatigue Self-Test (CFST)                                     | 1995           | Self-Report              | (PTSD) (burnout)                                                                                                                                                                                | 120                   | "I find my life satisfying."<br>"I feel connected to others"                                                                                                                                                                      | 6-point Likert type scale from 0 (Never) to 5 (Very Often)                                                                                                                                                                                                 |
| Compassion Focused Therapy Therapist Competence Rating Scale (CFT-TCRS) | 2020           | Peer/Corollary Report    | (unique competencies) (microskills)                                                                                                                                                             | 23                    |                                                                                                                                                                                                                                   |                                                                                                                                                                                                                                                            |
| Compassion Motivation and Action Scales (CMAS) for Compassion           | 2017           | Self-Report              | (Intention) (Distress Tolerance) (Action)                                                                                                                                                       | 12                    | "I want to be kinder and more caring towards people I don't know"<br>"I plan to take action and be more helpful to others"                                                                                                        | 7-point Likert scale (1 = strongly disagree to 7 = strongly agree)                                                                                                                                                                                         |
| Compassion Motivation and Action Scales (CMAS) for Self-Compassion      | 2017           | Self-Report              | (Intention) (Distress Tolerance) (Action)                                                                                                                                                       | 18                    | "I wish to be kind and caring towards myself when faced with difficulties"<br>"I want to be supportive towards myself when I face disappointments in my life"                                                                     | 7-point Likert scale (1 = strongly disagree to 7 = strongly agree)                                                                                                                                                                                         |
| Compassion Scale                                                        | 2011           | Self-Report              | (generosity) (hospitality) (objectivity) (sensitivity) (tolerance)                                                                                                                              | 10                    | "How much of your future savings would you give away now to help a stranger in need of financial help"<br>"How many times would you deny yourself the pleasure of something that causes others pain"                              | response categories (ranging from not true of me to very true of me)                                                                                                                                                                                       |
| Compassion Scale (CS)                                                   | 2019           | Self-Report              | (kindness) (common humanity) (mindfulness) (indifference)                                                                                                                                       | 16                    | "I like to be there for others in times of difficulty"<br>"My heart goes out to people who are unhappy"                                                                                                                           | 5-point Likert scale from 1 (almost never) to 5 (almost always)                                                                                                                                                                                            |
| Compassionate Care Assessment Tool (CCAT)®                              | 2013           | Self-Report              | (meaningful connection) (patient expectations) (caring attributes) (capable practitioner)                                                                                                       | 28                    | "Being empathetic"<br>"Considering of personal needs"                                                                                                                                                                             | 6-point Likert scale from never to always                                                                                                                                                                                                                  |
| Compassionate Engagement and Action Scales (CEAS)                       | 2017           | Self-Report              | (Engagement) (actions) (Sensitivity to Suffering) (Engagement with suffering)                                                                                                                   | 39                    |                                                                                                                                                                                                                                   | 10-point Likert scale (1 = 'never' to 10 = 'always')                                                                                                                                                                                                       |
| Compassionate Love Scale (CLS)                                          | 2005           | Self-Report              | No Subscales                                                                                                                                                                                    | 21                    | "When I see people I do not know feeling sad, I feel a need to reach out to them."<br>"It is easy for me to feel the pain (and joy) experienced by others, even though I do not know them."                                       | 7-point Likert-type scale ranging from 1 (not at all true of me) to 7 (very true of me)                                                                                                                                                                    |
| Compassionate Love Scale for Humanity - Short Form (CLS-H-SF)           | 2020           | Self-Report              | No Subscales                                                                                                                                                                                    | 9                     | "When I hear about someone (a stranger) going through a difficult time, I feel a great deal of compassion for him or her"<br>"It is easy for me to feel the pain (and joy) experienced by others, even though I do not know them" | 7-point Likert scale with 1 = "Not at all true of me" and 7 = "Very true of me"                                                                                                                                                                            |
| Complementary Measure of Psychotherapy Measure (COMPO)                  | 2021           | Self-Report              | (Self-acceptance) (Self-knowledge) (Relationship quality) (Consideration of others)                                                                                                             | 12                    | "People tell me that I am understanding"<br>"I try to consider how others feel about my criticism before I voice them"                                                                                                            | Likert-type scale, with response options of 1 = strongly disagree, 2 = disagree, 3 = slightly disagree, 4 = neither agree nor disagree, 5 = slightly agree, 6 = agree, 7 = strongly agree                                                                  |
| Comprehensive Object Relations Profile (CORP)                           | 1984           | Self-Report              | (object constancy) (object integration) (empathy)                                                                                                                                               | 6                     |                                                                                                                                                                                                                                   |                                                                                                                                                                                                                                                            |
| Comrey Personality Scales (CPS)                                         | 1970           | Self-Report              | (shyness) (dependence) (empathy) (neuroticism) (compulsion) (hostility) (socialization)                                                                                                         | 216                   | "A sad movie makes me feel like crying"<br>"I am rather insensitive to the difficulties that other people are having."                                                                                                            | 7-point Likert-type scale ranging from 1 (never or definitely not) to 7 (always or definitely)                                                                                                                                                             |
| Connection Index (CI12)                                                 | 2022           | Self-Report              | (psychological safety) (educational alliance) (empathy) (feedback)                                                                                                                              | 12                    | "Overall, I felt comfortable asking questions of, asking for help from, and admitting mistakes to this person"<br>"Overall, this person could understand my experience and perspective"                                           | 7-point Likert item scales. Scores ranged from 1 to 7, with higher scores indicating more favorable connections.                                                                                                                                           |

| Instrument                                                         | Published Year | Type of Measure          | Subscales/ Forms                                                                                                                                                                                                                                                                  | Total Number of Items | Sample Item(s)                                                                                                                                                                                                                                      | Response set                                                                                                                                                                 |
|--------------------------------------------------------------------|----------------|--------------------------|-----------------------------------------------------------------------------------------------------------------------------------------------------------------------------------------------------------------------------------------------------------------------------------|-----------------------|-----------------------------------------------------------------------------------------------------------------------------------------------------------------------------------------------------------------------------------------------------|------------------------------------------------------------------------------------------------------------------------------------------------------------------------------|
| Connor-Davidson Resilience Scale 10 (CD-RISC-10)                   | 2003           | Self-Report              | No Subscales                                                                                                                                                                                                                                                                      | 7                     | "I am able to adapt to change."<br>"I can deal with whatever comes."                                                                                                                                                                                | 5-point Likert, 0 = not true at all, 4 = true nearly all the time                                                                                                            |
| Consultation and Relational Empathy (CARE) Measure                 | 2002           | Self-Report              | No Subscales                                                                                                                                                                                                                                                                      | 19                    | "How was the doctor at fully understanding your concerns?"<br>"How was the doctor at showing care and compassion?"                                                                                                                                  | 5-point Likert-type scale ranging from 1 (Poor) to 5 (Excellent)                                                                                                             |
| Consumer Orientation Questionnaire (SCOI)                          | 2000           | Self-Report              | No Subscales                                                                                                                                                                                                                                                                      | 35                    |                                                                                                                                                                                                                                                     |                                                                                                                                                                              |
| Contingency Management Competence Scale (CMCS)                     | 2009           | Behavioural/Expert Coder | (general) (draw)                                                                                                                                                                                                                                                                  | 12                    | "To what extent did the therapist state how many draws were earned at this session?"<br>"Empathy (conveys warmth and sensitivity, demonstrates genuine concern and a non-judgmental stance, understands/expresses clients' feelings and concerns)." | 7-point scale, with higher numbers reflecting better usage. Competence ratings anchored the 1 with the phrase "Very poor," and the 7 was anchored with the word "Excellent." |
| Counselor Behavior Analysis (CBA)                                  | 1986           | Self-Report              | (counselor adaptability) (counselor empathy) (counselor talkativeness) (counselor overall effectiveness)                                                                                                                                                                          | 24                    |                                                                                                                                                                                                                                                     |                                                                                                                                                                              |
| Countertransference Management Scale (CMS)                         | 2017           | Peer/Corollary Report    | (understanding self and client) (self-integration and regulation)                                                                                                                                                                                                                 | 22                    | "Grasps theoretically clients' dynamics in terms of what goes on in the therapeutic relationship"<br>"Effectively connects strands of clients' material in developing conceptualizations of clients"                                                | 5-point scale where 1 strongly disagree, 3 neither agree nor disagree, and 5 strongly agree                                                                                  |
| Curtin Vicarious Response Scales (CVRS)                            | 2012           | Self-Report              | (perspective taking) (empathy) (emotional lability)                                                                                                                                                                                                                               | 28                    |                                                                                                                                                                                                                                                     |                                                                                                                                                                              |
| Decentering Scale for Sport (DSS)                                  | 1996           | Self-Report              | No Subscales                                                                                                                                                                                                                                                                      | 28                    | "During training and competition.....<br>I can pull myself out of annoying thoughts or images without being controlled by them."<br>I can distinguish thoughts which are objective reflections from those which are my personal thinking."          | 5-point Likert-type scale ranging from 1 (never true) to 5 (always true)                                                                                                     |
| Defending Behaviors Scale (DBS)                                    | 2020           | Self-Report              | (reporting to authority) (comforting) (aggressive) (solution-focused)                                                                                                                                                                                                             | 20                    | "When I'm upset at someone, I usually try to put myself in his shoes for a while"<br>"I often have tender concerned feeling for people less fortunate than me"                                                                                      | 5-point Likert type scale from 0 (doesn't describe me at all) to 4 (describes me very well)                                                                                  |
| Dental Beliefs Survey - Revised (DBS-R)                            | 1995           | Self-Report              | (ethics) (communication) (control) (trust)                                                                                                                                                                                                                                        | 28                    | "Dentists do not like patient requests."<br>"Dentists seem to be in a hurry, so I feel rushed."                                                                                                                                                     | 5-point Likert-type scale ranging from 1 (never) to 5 (nearly always)                                                                                                        |
| Dental Home Scale (DHS)                                            | 2019           | Peer/Corollary Report    | No Subscales                                                                                                                                                                                                                                                                      | 10                    | "During the last 2 years, how often did dentists or their staff show respect for what you had to say?"<br>"During the last 2 years how often have you felt that dentists or their staff treated you unfairly because of your race?"                 | Always/usually/sometimes/Never/DK                                                                                                                                            |
| Dentist-Patient Relationship Skills Assessment [Unnamed]           | 2012           | Self-Report              | (verbal and nonverbal communication) (empathy and assertiveness) (behavioral characteristics and personality traits) (pharmacological and nonpharmacological control techniques)                                                                                                  | 44                    | "Listens actively, interspersing expressions and questions, showing attention to the patient's history"<br>"Expresses kindness, reflecting a positive attitude of willingness to help"                                                              |                                                                                                                                                                              |
| Diabetes-Specific Self-Compassion Scale (SCS-Dp)                   | 2003           | Self-Report              | No Subscales                                                                                                                                                                                                                                                                      | 19                    | "When I fail at something important to me, I become consumed by feelings of inadequacy."<br>"I try to see my failing as part of the human condition."                                                                                               | 5-point Likert-type scale ranging from 1 (almost never) to 5 (almost always)                                                                                                 |
| Dietrich Object Relations and Object Representations Scale (DOROS) | 1985           | Peer/Corollary Report    | (object investment) (sadistic vs neutralized aggression) (object warmth) (quality/level of object relatedness) (empathy) (object love) (superego harshness vs superego benevolence) (helplessness vs internal sense of control) (psychological mindedness) (degree of depression) | 4                     |                                                                                                                                                                                                                                                     |                                                                                                                                                                              |
| Driving While Impaired Therapeutic Educator Inventory (DTEI)       | 2001           | Self-Report              | (judicial) (disease) (structure) (relationship) (interaction) (empathic-supportive)                                                                                                                                                                                               | 69                    | "Genetics play the primary role in alcoholism"<br>"It's difficult to believe others when they tell me that I do not understand them"                                                                                                                | 6-point Likert scale from 0 (strongly disagree) to 5 (strongly agree)                                                                                                        |
| DSM-5 Level of Personality Functioning Questionnaire (DLOPFQ)      | 2017           | Self-Report              | (self-direction) (identity) (empathy) (intimacy)                                                                                                                                                                                                                                  | 66                    | "It is a waste of time to think about my or others' personal reactions"                                                                                                                                                                             | 6-point Likert type scale from 1 (strongly disagree) to 6 (strongly agree)                                                                                                   |
| Dymond's Test of Insight and Empathy                               | 1949           | Self-Report              | No Subscales                                                                                                                                                                                                                                                                      | 24                    | "Friendliness"<br>"Sympathy"                                                                                                                                                                                                                        | 5-point scale                                                                                                                                                                |

| Instrument                                           | Published Year | Type of Measure          | Subscales/ Forms                                                                                                                                                                                                                                                                                                            | Total Number of Items | Sample Item(s)                                                                                                                                                           | Response set                                                                                                                    |
|------------------------------------------------------|----------------|--------------------------|-----------------------------------------------------------------------------------------------------------------------------------------------------------------------------------------------------------------------------------------------------------------------------------------------------------------------------|-----------------------|--------------------------------------------------------------------------------------------------------------------------------------------------------------------------|---------------------------------------------------------------------------------------------------------------------------------|
| ECRC Altruism Scale                                  | 2021           | Self-Report              | No Subscales                                                                                                                                                                                                                                                                                                                | 5                     | "I really care about the needs of other people"<br>"I enjoy doing things for others"                                                                                     | 5-point Likert scale (i.e., strongly disagree = 1, disagree = 2, neither agree nor disagree = 3, agree = 4, strongly agree = 5) |
| Edinburgh Social Cognition Test (ESCoT)              | 2018           | Behavioural/Expert Coder | (Cognitive ToM) (Affective ToM) (Interpersonal understanding of social norms) (Intrapersonal understanding of social norms)                                                                                                                                                                                                 | 5                     | "What is X thinking?"<br>"How does X feel at the end of the animation?"                                                                                                  | N/A                                                                                                                             |
| Effects of Meditation (EOM) Scale                    | 2009           | Self-Report              | (cognitive effects) (mystical experiences) (relaxation) (physical discomfort and emotional effects) (effects of meditation in everyday life)                                                                                                                                                                                | 18                    | "I experience fluctuating emotions"<br>"I observe without judgement any negative thoughts or emotions that arise"                                                        | 5-point Likert-type scale ranging from 1 (almost never) to 5 (almost always)                                                    |
| Eight-Item Toronto Alexithymia Scale (TAS-8)         | 2020           | Self-Report              | (Difficulty identifying feels) (Difficulty describing feelings) (Externally oriented thinking)                                                                                                                                                                                                                              | 8                     | "I am often confused about what emotion I am feeling"<br>"It is difficult for me to find the right words for my feelings"                                                | Five-point Likert scale items from Strongly Disagree to Strongly Agree                                                          |
| Emotion Specific Empathy (ESE) Questionnaire         | 2014           | Self-Report              | (anger affective empathy) (anger cognitive empathy) (disgust affective empathy) (disgust cognitive empathy) (fear affective empathy) (fear cognitive empathy) (happy affective empathy) (happy cognitive empathy) (sad affective empathy) (sad cognitive empathy) (surprise affective empathy) (surprise cognitive empathy) | 60                    | "When I see someone being taken advantage of, I feel kind of protective toward them"<br>"I cannot continue to feel OK if people around me are depressed"                 | 7-point response scale ranging from -3 (disagree strongly) to 3 (agree strongly)                                                |
| Emotional Accuracy Research Scale (EARS)             | 1996           | Self-Report              | (consensus-agreement) (target-agreement score)                                                                                                                                                                                                                                                                              | 24                    | The suffering of others deeply disturbs me                                                                                                                               | multiple choice and forced choice items                                                                                         |
| Emotional Intelligence (EI) Instrument               | 2000           | Self-Report              | (maturity) (compassion) (morality) (sociability) (calm disposition)                                                                                                                                                                                                                                                         | 34                    | "I sympathize with others when they have problem"<br>"I keep myself focused on my goals"                                                                                 | 5-point Likert-type scale ranging from 1 (never like me) to 5 (always like me)                                                  |
| Emotional Intelligence Inventory (EII)               | 1998           | Self-Report              | (handling relationships) (utilization of feelings) (empathy) (self-control)                                                                                                                                                                                                                                                 | 172                   | "I sympathize with others when they have problem"<br>"I keep myself focused on my goals"                                                                                 | 5-point Likert-type scale ranging from 1 (never like me) to 5 (always like me)                                                  |
| Emotional Intelligence Scale (EIS)                   | 1998           | Self-Report              | (optimism/mood regulation) (appraisal of emotions) (social skills) (utilization of emotions)                                                                                                                                                                                                                                | 33                    | "I know when to speak about my personal problems to others"<br>"I expect I will do well on most things I try"                                                            | 5-point Likert-type scale ranging from 1 (strongly disagree it is like me) to 5 (strongly agree this is like me)                |
| Emotional Intimacy Scale (EIS)                       | 2005           | Peer/Corollary Report    | No Subscales                                                                                                                                                                                                                                                                                                                | 5                     | "This person completely accepts me as I am."<br>"I can openly share my deepest thoughts and feelings with this person."                                                  | 5-point Likert scale ranging from 1 (rarely) to 5 (a great deal of time)                                                        |
| Emotional Logic Development Profile (ELDP)           | 1995           | Self-Report              | No Subscales                                                                                                                                                                                                                                                                                                                | 36                    | "I feel confident in myself."<br>"I can talk about my feelings."                                                                                                         | 0 = clearly individual; 1 = borderline; 2 = clearly relational.                                                                 |
| Emotional Response Questionnaire (ERQ)               | 2018           | Self-Report              | No Subscales                                                                                                                                                                                                                                                                                                                | 6                     | "I often have tender or concerned feelings for people less fortunate than me"<br>"I try to look at everybody's side of a disagreement before I make a decision"          | Likert rating scale (ranging from 'not at all' to 'very much')                                                                  |
| Emotional Skills and Competence Questionnaire (ESCQ) | 1997           | Self-Report              | (perceive and understand emotions) (express and label emotions) (manage and regulate emotions)                                                                                                                                                                                                                              | 45                    | "When I see how someone feels, I usually know what has happened to him"<br>"I notice when somebody feels down"                                                           | 6-point Likert-type scale ranging from 1 (never) to 6 (always)                                                                  |
| Empathetic Care Scale (ECS)                          | 2013           | Self-Report              | (extra-role behavior) (relational richness) (emotional engagement)                                                                                                                                                                                                                                                          | 10                    | "I help my clients feel better when they are down"<br>"My clients' emotional state is just as important as their physical state"                                         | strongly disagree (1) to strongly agree (7) scales                                                                              |
| Empathetic Understanding Assessment (EUA)            | 2007           | Behavioural/Expert Coder | (maternal representational ability) (mothers views of their children's emotional experience) (mothers' views of their own emotion)                                                                                                                                                                                          |                       |                                                                                                                                                                          |                                                                                                                                 |
| Empathic Communication Coding System (ECCS)          | 2002           | Self-Report              | No Subscales                                                                                                                                                                                                                                                                                                                | N/a                   | "Statement of shared feeling and experience"<br>"Implicit recognition of patient perspective"                                                                            | ECCS used to code physician responses to empathic opportunities                                                                 |
| Empathic Counselor Response Scale (ECRS)             | 2020           | Behavioural/Expert Coder | No Subscales                                                                                                                                                                                                                                                                                                                | 24                    |                                                                                                                                                                          | Likert-type scale of very unempathic (1), somewhat unempathic (2), somewhat empathic (3), and very empathic (4)                 |
| Empathic Experience Scale (EES)                      | 2018           | Self-Report              | (vicarious experience) (intuitive understanding)                                                                                                                                                                                                                                                                            | 30                    | "I easily get carried away by the lyrics of a love song"<br>"I don't get overly involved with friends' problems"                                                         | 5-point Likert-type scale ranging from 1 (Not at all true) to 5 (Completely true)                                               |
| Empathic Expressions Scale (EES)                     | 2021           | Self-Report              | (Verbal Affirmation) (Experience Sharing) (Empathic Voice) (Emotional Reactivity) (Empathic Touch)                                                                                                                                                                                                                          | 28                    | "When people are feeling negative emotion, I encourage them by saying that they will get through this"<br>"I tell people I know what it is like to feel the way they do" | 7-point Likert-scale ranging from 1 = never to 7 = very often                                                                   |



| Instrument                                                     | Published Year | Type of Measure          | Subscales/ Forms                                                                                                                    | Total Number of Items | Sample Item(s)                                                                                                                                               | Response set                                                                                                                                                                                                                                                                                                |
|----------------------------------------------------------------|----------------|--------------------------|-------------------------------------------------------------------------------------------------------------------------------------|-----------------------|--------------------------------------------------------------------------------------------------------------------------------------------------------------|-------------------------------------------------------------------------------------------------------------------------------------------------------------------------------------------------------------------------------------------------------------------------------------------------------------|
| Empathic Tendency Scale (ETS)                                  | 1988           | Self-Report              | (empathic skill) (empathic environment) (anti-empathic attitude)                                                                    | 29                    | "Interested in the problems of those around me as much as mine"<br>"I am gentle to understand that people get cried while watching movies"                   | 5-point Likert scale ranging from "totally agree" to "totally disagree".                                                                                                                                                                                                                                    |
| Empathic Understanding Rating Scale                            | 1976           | Behavioural/Expert Coder | No Subscales                                                                                                                        | N/a                   |                                                                                                                                                              |                                                                                                                                                                                                                                                                                                             |
| Empathy Accuracy (EA) Task                                     | 2009           | Self-Report              | No Subscales                                                                                                                        | 27                    | picture items                                                                                                                                                | rate the perceived emotional intensity of each target using a 9-point scale from 1 (no emotion) to 9 (very strong emotion)                                                                                                                                                                                  |
| Empathy and Clarity Rating Scale (ECRS)                        | 2015           | Behavioural/Expert Coder | (fostering relationship/supporting emotion) (gathering information) (providing information) (helping the patient to make decisions) | 75                    | "Sets the stage for the encounter and ongoing care and made patient feel at ease"<br>"Listens actively and conveys full understanding of patient's concerns" | 5 (desired), 4 (Needs minimal adjustment), 3 (Skills developing), 2 (Needs significant adjustment), 1 (Unsatisfactory)                                                                                                                                                                                      |
| Empathy Assessment Index (EAI)                                 | 2010           | Self-Report              | (affective response) (self-other awareness) (perspective-taking) (emotion regulation) (empathic attitude)                           | 54                    | "When a friend is sad, I become sad"<br>"I feel what another person is feeling even when I don't know the person"                                            | 5-point Likert-type scale ranging from 1 (Never) to 5 (Always)                                                                                                                                                                                                                                              |
| Empathy Assessment Scale (EAS)                                 | 2022           | Self-Report              | (Social Interaction) (Cognitive Behavior) (Emotional Identification)                                                                | 13                    | "Being together with a sad person, I feel sad too"<br>"I sincerely congratulate my successful opponent"                                                      | 5-point Likert-type grading was used as never, rarely, sometimes, often, and always                                                                                                                                                                                                                         |
| Empathy Clinical Evaluation Exercise (ECEX)                    | 2019           | Behavioural/Expert Coder | No Subscales                                                                                                                        | 4                     |                                                                                                                                                              |                                                                                                                                                                                                                                                                                                             |
| Empathy Components Questionnaire (ECQ)                         | 2017           | Self-Report              | (cognitive ability) (cognitive drive) (affective ability) (affective drive) (affective reactivity)                                  | 39                    | "It affects me very much when one of my friend is upset"<br>"I get very upset when I see someone cry"                                                        | 4-point response scale ranging from 1 (strongly disagree) to 4 (strongly agree)                                                                                                                                                                                                                             |
| Empathy Construct Rating Scale (ECRS)                          | 1981           | Self-Report              | (nonverbal behaviour) (personality traits) (sensitivity to another's world) (responding) (respect for self and others)              | 100                   | Seems to understand another person's state of being." 6-point Likert scales                                                                                  |                                                                                                                                                                                                                                                                                                             |
| Empathy for Action Pain Picture Database (EPSS-Action_Picture) | 2023           | Self-Report              | (Pain intensity) (Affective valence) (Arousal) (Dominance)                                                                          | 478                   |                                                                                                                                                              | 9 point rating scales per dimension: pain intensity (1 = no sensation, 4 = pain threshold, 9= most intense pain imaginable), affective valence (1 = very unhappy, 9 = very happy), arousal (1=extremely peaceful, 9 = extremely excited), dominance (1= extremely out of control, 9 = extremely in control) |
| Empathy for Action Pain Video Database (EPSS-Action_Video)     | 2023           | Self-Report              | (Pain intensity) (Affective valence) (Arousal) (Dominance)                                                                          | 478                   |                                                                                                                                                              | 9 point rating scales per dimension: pain intensity (1 = no sensation, 4 = pain threshold, 9= most intense pain imaginable), affective valence (1 = very unhappy, 9 = very happy), arousal (1=extremely peaceful, 9 = extremely excited), dominance (1= extremely out of control, 9 = extremely in control) |
| Empathy for Face Pain Picture Database (EPSS-Face)             | 2023           | Self-Report              | (Pain intensity) (Affective valence) (Arousal) (Dominance)                                                                          | 160                   |                                                                                                                                                              | 9 point rating scales per dimension: pain intensity (1 = no sensation, 4 = pain threshold, 9= most intense pain imaginable), affective valence (1 = very unhappy, 9 = very happy), arousal (1=extremely peaceful, 9 = extremely excited), dominance (1= extremely out of control, 9 = extremely in control) |
| Empathy for Limb Pain Picture Database (EPSS-Limb)             | 2023           | Self-Report              | (Pain intensity) (Affective valence) (Arousal) (Dominance)                                                                          | 136                   |                                                                                                                                                              | 9 point rating scales per dimension: pain intensity (1 = no sensation, 4 = pain threshold, 9= most intense pain imaginable), affective valence (1 = very unhappy, 9 = very happy), arousal (1=extremely peaceful, 9 = extremely excited), dominance (1= extremely out of control, 9 = extremely in control) |
| Empathy for Pain Scale (EPS)                                   | 2014           | Self-Report              | (affective distress) (empathic concern) (vicarious pain)                                                                            | 48                    | "Sense of compassion"<br>"Sense of what it feels like"                                                                                                       | 5-point response scale ranging from 1 (strongly disagree) to 5 (strongly agree)                                                                                                                                                                                                                             |

| Instrument                                                                   | Published Year | Type of Measure          | Subscales/ Forms                                                                                                                                                                                                                                                                                                   | Total Number of Items | Sample Item(s)                                                                                                                                                                           | Response set                                                                                                                                                                                                                                                                                                |
|------------------------------------------------------------------------------|----------------|--------------------------|--------------------------------------------------------------------------------------------------------------------------------------------------------------------------------------------------------------------------------------------------------------------------------------------------------------------|-----------------------|------------------------------------------------------------------------------------------------------------------------------------------------------------------------------------------|-------------------------------------------------------------------------------------------------------------------------------------------------------------------------------------------------------------------------------------------------------------------------------------------------------------|
| Empathy for Voice Pain Database (EPSS-Voice)                                 | 2023           | Self-Report              | (Pain intensity) (Affective valence) (Arousal) (Dominance)                                                                                                                                                                                                                                                         | 60                    |                                                                                                                                                                                          | 9 point rating scales per dimension: pain intensity (1 = no sensation, 4 = pain threshold, 9= most intense pain imaginable), affective valence (1 = very unhappy, 9 = very happy), arousal (1=extremely peaceful, 9 = extremely excited), dominance (1= extremely out of control, 9 = extremely in control) |
| Empathy Gradient Questionnaire (EGQ)                                         | 2017           | Self-Report              | (family empathy) (friend empathy) (peer/colleague empathy) (distant other empathy) (species empathy)                                                                                                                                                                                                               | 23                    | "I worry about people living in poverty overseas"<br>"I become upset when I see someone hurt, even when I do not know the person very well"                                              | 5-point response scale ranging from 1 (very much disagree) to 5 (very much agree)                                                                                                                                                                                                                           |
| Empathy Index (EI)                                                           | 2016           | Self-Report              | (emotional contagion) (behavioral contagion)                                                                                                                                                                                                                                                                       | 14                    | "If I see someone fidgeting, I'll start feeling anxious too"<br>"If I see a video of a baby smiling, I find myself smiling"                                                              | 5-point Likert-type scale                                                                                                                                                                                                                                                                                   |
| Empathy Measure for Parents Analog Task - Emotion Audio (EMPAT-EA)           | 2021           | Self-Report              | (Happy) (Mad) (Sad) (Scared)                                                                                                                                                                                                                                                                                       | 16                    | Happy, Mad, Cheerful, Sad                                                                                                                                                                | 5-point Likert scale to rate how hearing the child in each clip made them feel                                                                                                                                                                                                                              |
| Empathy Measure for Parents Analog Task - Emotion Scripts (EMPAT-ES)         | 2021           | Self-Report              | (Happy) (Mad) (Sad) (Scared)                                                                                                                                                                                                                                                                                       | 16                    | Happy, Mad, Cheerful, Sad                                                                                                                                                                | 5-point Likert scale to rate how hearing the child in each clip made them feel                                                                                                                                                                                                                              |
| Empathy Questionnaire for Children and Adolescents (EmQue-CA)                | 2010           | Self-Report              | (affective empathy) (cognitive empathy) (intention to comfort)                                                                                                                                                                                                                                                     | 14                    | "When a friend is upset, I feel upset too"<br>"If someone in my family is sad, I feel really bad"                                                                                        | 5-point Likert type scale from 0 (completely untrue) to 4 (completely true)                                                                                                                                                                                                                                 |
| Empathy Quotient - Child (EQ-C)                                              | 2009           | Self-Report              | No Subscales                                                                                                                                                                                                                                                                                                       | 55                    | "I find it hard to understand how to behave in a social situation"<br>"In a conversation, I tend to focus on my own thoughts rather than on what my listener might be thinking."         | 5-point Likert-type scale ranging from 0 (strongly disagree) to 4 (strongly agree)                                                                                                                                                                                                                          |
| Empathy Quotient - Short (EQ-Short)                                          | 2003           | Self-Report              | No Subscales                                                                                                                                                                                                                                                                                                       | 22                    | "I am good at predicting how someone will feel"<br>"I am quick to spot when someone in a group is feeling awkward or uncomfortable"                                                      | Likert type scale with half worded "agree" and half worded "disagree" each to varying degree                                                                                                                                                                                                                |
| Empathy Quotient (EQ)                                                        | 2004           | Self-Report              | (cognitive empathy) (emotional reactivity) (social skills)                                                                                                                                                                                                                                                         | 60                    | "I find it hard to understand how to behave in a social situation"<br>"In a conversation, I tend to focus on my own thoughts rather than on what my listener might be thinking."         | 5-point Likert-type scale ranging from 0 (strongly disagree) to 4 (strongly agree)                                                                                                                                                                                                                          |
| Empathy Scale for Social Workers (ESSW)                                      | 2012           | Self-Report              | (compassionate contextual assessment) (accepting and attentive collaborative inquiry) (intrinsic helping and emotional support)                                                                                                                                                                                    | 41                    | "I am kind to my clients"<br>"I am attentive to my clients' nonverbal cues"                                                                                                              | 5-point Likert-type scale ranging from 1 (never) to 5 (always)                                                                                                                                                                                                                                              |
| Empathy Selection Task                                                       | 2010           | Self-Report              | No Subscales                                                                                                                                                                                                                                                                                                       | N/a                   |                                                                                                                                                                                          |                                                                                                                                                                                                                                                                                                             |
| Empathy Test                                                                 | 1979           | Self-Report              | No Subscales                                                                                                                                                                                                                                                                                                       | 17                    |                                                                                                                                                                                          |                                                                                                                                                                                                                                                                                                             |
| Empathy Towards People with Intellectual Disabilities Questionnaire (EMP-ID) | 2015           | Self-Report              | (proximity) (challenge) (active attunement)                                                                                                                                                                                                                                                                        | 20                    | "I get angry when I think of how people with intellectual disabilities have been treated"<br>"I always try to tune into the feelings of people with intellectual disabilities around me" | 5-point Likert-type scale from 1 (not at all) to 5 (very much)                                                                                                                                                                                                                                              |
| Empathy-Enhancing Virtual Evolving Environment (EEVEE)                       | 2015           | Self-Report              | No Subscales                                                                                                                                                                                                                                                                                                       | 16                    |                                                                                                                                                                                          |                                                                                                                                                                                                                                                                                                             |
| English Youth Self-Report Version of the ICU                                 | 2004           | Self-Report              | (Callous-Unemotional) (Empathic-Prosocial)                                                                                                                                                                                                                                                                         | 18                    | "I do not care who I hurt to get what I want."<br>"I do not care about being on time."                                                                                                   | 4-point response scale ranging from 1- Not at all true to 4 – Definitely true                                                                                                                                                                                                                               |
| Equanimity Barriers Scale (EBS)                                              | 2018           | Self-Report              | (innate) (social) (interactive) (reflective)                                                                                                                                                                                                                                                                       | 15                    | "Organisations or institutions influence the way I perceive others?"<br>"I feel that the media influences my feelings towards others?"                                                   | 7-point response scale ranging from 1 (strongly disagree) to 7 (strongly agree)                                                                                                                                                                                                                             |
| Essential Properties of Yoga Questionnaire (EPYQ)                            | 2018           | Behavioural/Expert Coder | (acceptance/compassion) (breathwork) (physicality) (active postures (asanas)) (restorative postures (asanas)) (body locks (bandhas)) (body awareness) (mental & emotional awareness/release) (health benefits) (individual attention) (social aspects) (spirituality) (meditation & mindfulness) (yoga philosophy) | 61                    | "How much did the instructor mention or include placing one's focus on the breath?"<br>"How much did the instructor mention or include vigorous activity or physical exertion?"          | 5-point Likert scale from 1 (not at all) to 5 (a very large amount)                                                                                                                                                                                                                                         |
| Ethical Wills Assessment                                                     | 2009           | Self-Report              | No Subscales                                                                                                                                                                                                                                                                                                       | 22                    |                                                                                                                                                                                          |                                                                                                                                                                                                                                                                                                             |
| Ethnic Minority Patient-3 (EMP-3)                                            | 2010           | Self-Report              | (physicians task perception and ideas on cultural differences in health and healthcare) (physicians' attitudes towards physician-patient communication with minority patients) (physicians' perception of minority patients' needs in communication)                                                               | 18                    | "Physicians should be empathic toward every patient, even if they have completely different opinions"<br>"Physicians have a moral duty toward taking care of refugees"                   |                                                                                                                                                                                                                                                                                                             |

| Instrument                                                                           | Published Year | Type of Measure       | Subscales/ Forms                                                                                                                                                                                                                                      | Total Number of Items | Sample Item(s)                                                                                                                                                                                                            | Response set                                                                                                                              |
|--------------------------------------------------------------------------------------|----------------|-----------------------|-------------------------------------------------------------------------------------------------------------------------------------------------------------------------------------------------------------------------------------------------------|-----------------------|---------------------------------------------------------------------------------------------------------------------------------------------------------------------------------------------------------------------------|-------------------------------------------------------------------------------------------------------------------------------------------|
| Evaluating Goelman's Five Dimensions of Emotional Intelligence [Unnamed]             | 2013           | Self-Report           | (self-awareness) (mood management) (self-motivation) (empathy) (managing relationships)                                                                                                                                                               | 25                    | "I am adept at recognizing anxiety in others"<br>"I am adept at recognizing nonverbal cues associated with feelings in others"                                                                                            | 5-point Likert-type scale ranging from 1 (never) to 5 (always)                                                                            |
| Everyday Multicultural Competencies/Revised Scale of Ethnocultural Empathy(EMC/RSEE) | 2014           | Self-Report           | (cultural openness and desire to learn) (resentment and cultural dominance) (anxiety and lack of multicultural self-efficacy) (empathic perspective-taking) (awareness of contemporary racism and privilege) (empathic feeling and acting as an ally) | 84                    | "I get disturbed when other people experience misfortunes due to their racial or ethnic background"<br>"I share the anger of people who are victims of hate crimes"                                                       | 6-point Likert-type scale from 1 (strongly disagree) to 6 (strongly agree)                                                                |
| Evidence-Based Practice Profile (EBP2) Questionnaire                                 | 2010           | Self-Report           | (relevance) (terminology) (confidence) (practice) (sympathy)                                                                                                                                                                                          | 58                    | "How often have you formulated a clearly answerable question as the beginning of the process towards filling this gap?"<br>"How often have you tracked down the relevant evidence once you have formulated the question?" | 7-point Likert scale                                                                                                                      |
| Executive Function Index (EFI)                                                       | 2004           | Self-Report           | (empathy) (strategic planning) (organization) (impulse control) (motivational drive)                                                                                                                                                                  | 27                    | "Takes others' feelings into account"<br>"Concern for others"                                                                                                                                                             | 5-point Likert-type scale (1 = Not at all, 5 = Very much)                                                                                 |
| Experience Sampling Method (ESM)                                                     | 2017           | Self-Report           | (emotion-oriented) (intention-oriented)                                                                                                                                                                                                               |                       | "I get very upset when I see someone cry"<br>"It affects me very much when one of my friend seems upset"                                                                                                                  | 4-point Likert scale                                                                                                                      |
| Eysenck Personality Inventory (EPI)                                                  | 1995           | Self-Report           | (extraversion (neuroticism) (shyness and nervousness) (conscientiousness) (agreeableness) (openness or culture)                                                                                                                                       | 57                    | "Do you ever feel 'just miserable' for no good reason"<br>"Are you often troubled about feelings of guilt"                                                                                                                | yes/no                                                                                                                                    |
| Eysenck Personality Questionnaire - Revised (EPQ-R)                                  | 1985           | Self-Report           | (psychoticism) (extraversion) (neuroticism) (lie)                                                                                                                                                                                                     | 100                   | "Do you ever feel 'just miserable' for no good reason"<br>"Are you often troubled about feelings of guilt"                                                                                                                | yes/no                                                                                                                                    |
| Facets of Emotional Experiences in Everyday Life Scale (FEEELS)                      | 2022           | Self-Report           | (Anger) (Fear) (Joy) (Love) (Sadness) (Surprise)                                                                                                                                                                                                      | 97                    | In the past hour, I felt... [cranky, thankful, amazed, compassionate]                                                                                                                                                     | 5-point scale: Not at all, somewhat, moderately, quit a bit, extremely                                                                    |
| Facilitative Interpersonal Skills for Child Therapy (FIS-C)                          | 2018           | Self-Report           | (verbal fluency) (hope and positive expectations) (persuasiveness) (emotional expression) (warmth, acceptance and understanding) (empathy) (alliance bond capacity) (alliance rupture repair responsiveness)                                          | 7                     |                                                                                                                                                                                                                           | 5-point Likert-type scale, ranging from '1' (not characteristic) to '5' (extremely characteristic)                                        |
| Faculty Evaluation Instrument [Unnamed]                                              | 2000           | Peer/Corollary Report | (competency and professionalism) (commitment to knowledge and instruction) (inclusion and interaction) (patient focus) (openness to ideas)                                                                                                            | 18                    |                                                                                                                                                                                                                           |                                                                                                                                           |
| Family Nurse Caring Belief Scale (FNCBS)                                             | 2007           | Self-Report           | No Subscales                                                                                                                                                                                                                                          | 25                    | "I tell the family that I am their supporter"<br>"I am a worker who understand how the family truly feels"                                                                                                                | 5 point Likert type scale (1-strongly disagree to 5-strongly agree)                                                                       |
| Family Response Questionnaire (FRQ)                                                  | 2000           | Self-Report           | (sympathetic-empathic) (active engagement) (rejecting-hostile) (concern with self)                                                                                                                                                                    | 25                    | "Thought about how X must be feeling?"<br>"Worried about X's illness?"                                                                                                                                                    |                                                                                                                                           |
| Fat Attitudes Assessment Toolkit (FAAT)                                              | 2022           | Self-Report           | (Empathy) (Activism Orientation) (Size Acceptance) (Attractiveness) (Critical Health) (General Complexity) (Socioeconomic Complexity) (Responsibility) (Body Acceptance)                                                                              | 49                    | "Negative beliefs about body weight lead to negative assumptions about fat people"<br>"Fat people face discrimination in many areas of life"                                                                              | 1 (strongly disagree), 2 (disagree), 3 (mildly disagree), 4 (neither agree nor disagree), 5 (mildly agree), 6 (agree), 7 (strongly agree) |
| Fears of Compassion for Self Scale                                                   | 2011           | Self-Report           | (expressing compassion for others) (responding to compassion for others) (expressing kindness and compassion towards yourself)                                                                                                                        | 38                    | "Getting on in life is about being tough rather than compassionate"<br>"I fear that if I am more self-compassionate I will become a weak person"                                                                          | five-point Likert scale (0 = Don't agree at all, 4 = Completely agree)                                                                    |
| Fears of Compassion in Sport Scale (FCSS)                                            | 2022           | Self-Report           | (Fear of self-compassion) (Fear of compassion from others)                                                                                                                                                                                            | 10                    | "I fear that if I start to develop compassion for myself, I will become dependent on it"<br>"I fear that if I become too compassionate to myself, I will lose my self-criticism and my flaws will show"                   | 5-point Likert scale ranging from 0 (do not agree at all) to 4 (completely agree)                                                         |
| Fears of Compassion Scales                                                           | 2011           | Self-Report           | (expressing compassion for others) (responding to compassion for others) (expressing kindness and compassion towards yourself)                                                                                                                        | 45                    | "I fear that being too compassionate makes people an easy target"<br>"People need to help themselves rather than waiting for others to help them"                                                                         | five-point Likert scale (0 = Don't agree at all, 4 = Completely agree)                                                                    |
| Figley's Compassion Fatigue Scale - Revised                                          | 1995           | Self-Report           | (secondary trauma) (job burnout)                                                                                                                                                                                                                      | 13                    | "Losing sleep over client's traumatic experience"<br>"Intrusive thoughts after working with client"                                                                                                                       | 10-point, visual analog-type Likert scale (rarely/never = 1 to very often = 10)                                                           |

| Instrument                                                         | Published Year | Type of Measure          | Subscales/ Forms                                                                                                                                                                                                                                        | Total Number of Items | Sample Item(s)                                                                                                                                                                                     | Response set                                                                                          |
|--------------------------------------------------------------------|----------------|--------------------------|---------------------------------------------------------------------------------------------------------------------------------------------------------------------------------------------------------------------------------------------------------|-----------------------|----------------------------------------------------------------------------------------------------------------------------------------------------------------------------------------------------|-------------------------------------------------------------------------------------------------------|
| Five Facet Mindfulness Questionnaire (FFMQ)                        | 2006           | Self-Report              | (Observe) (Describe) (Nonjudge) (Nonreact) (Actaware)                                                                                                                                                                                                   | 39                    | "I criticize myself for having irrational or inappropriate emotions."<br>"When I have distressing thoughts or images, I feel calm soon after."                                                     | 5-point Likert-type scale ranging from 1 (never or very rarely true) to 5 (very often or always true) |
| Five-Factor Narcissism Inventory - Short Form (FFNI-SF)            | 2012           | Self-Report              | (acclaim seeking) (arrogance) (authoritativeness) (distrust) (entitlement) (exhibitionism) (exploitativeness) (grandiose fantasies) (indifference) (lack of empathy) (manipulativeness) (need for admiration) (reactive anger) (shame) (thrill seeking) | 60                    | "I make a point of trying not to hurt others in pursuit of my goals"<br>"I feel bad if my words or actions cause someone else to feel emotional pain"                                              | 5-point Likert-type scale ranging from 1 (disagree strongly) to 5 (agree strongly)                    |
| Forms of Responding to Self-Critical Thoughts Scale (FoReST)       | 2020           | Self-Report              | (unworkable action) (mindful acceptance)                                                                                                                                                                                                                | 46                    | "When I have a critical thought about myself, it gets me so down that I don't act in the way I should"<br>"When I have a critical thought about myself, I don't treat others the way I would like" | Likert type scale ranging from 0 to 3                                                                 |
| Four Habits Coding Scheme (4HCS)                                   | 2006           | Behavioural/Expert Coder | (invest in beginning) (elicit patient's perspective) (demonstrate empathy) (invest in end)                                                                                                                                                              | 23                    | "Demonstrating familiarity with the patient and greeting the patient warmly"<br>"Helping patients to identify their emotions; using appropriate nonverbal behavior"                                | 5-point scale                                                                                         |
| Four-Dimensional Connectedness Scale (4DCS)                        | 2011           | Self-Report              | (other workers) (recipients) (task requirement) (values)                                                                                                                                                                                                | 15                    | "I feel close to the people I am helping"<br>"I enjoy doing volunteer work"                                                                                                                        | 7-point Likert scale ranging from 1 = strongly disagree to 7 = strongly agree                         |
| Four-Item Mentalising Index                                        | 2021           | Self-Report              | No Subscales                                                                                                                                                                                                                                            | 4                     | "I find it easy to put myself in somebody else's shoes."<br>"I sometimes find it difficult to see things from other people's point of view."                                                       | 4-point Likert scale                                                                                  |
| General Anesthesia Satisfaction Questionnaire                      | 2012           | Self-Report              | No Subscales                                                                                                                                                                                                                                            | 23                    |                                                                                                                                                                                                    |                                                                                                       |
| Genuine Happiness Scale (GHS)                                      | 2022           | Self-Report              | No Subscales                                                                                                                                                                                                                                            | 4                     | "I experience an inner joy, no matter what the external circumstances are."<br>"Deep within me I retain an inner peace, regardless of the external circumstances"                                  | a 5-point rating scale ranging from 0 (never) to 4 (regularly)                                        |
| Global Interprofessional Therapeutic Communication Scale© (GITCS©) | 2019           | Behavioural/Expert Coder | (empathy) (power sharing) (trust and rapport building)                                                                                                                                                                                                  | 35                    | "Offers patient opportunities to organize and express their thoughts."<br>"Encouraged feedback and input from patient/family."                                                                     | Never, Rarely, Sometimes, Usually, Always, Not Applicable                                             |
| Global Rating Form for ACGME                                       | 1999           | Self-Report              | (interpersonal communication skills and professionalism) (medical knowledge) (patient care and systems-based care)                                                                                                                                      | 23                    | "Gather essential and accurate information about their patients."<br>"Effectiveness as a team member"                                                                                              | 5-point Likert-type scale ranging from 1 (severe deficits) to 5 (outstanding competence)              |
| Global Rating of Empathy Scale (GRE)                               | 2011           | Peer/Corollary Report    | (perspective taking) (compassionate care) (standing in the patient's shoes)                                                                                                                                                                             | 20                    | "It is difficult for me to view things from my patients' perspective"<br>"Patients feel better when their health care providers understand their feelings."                                        | 7-point Likert-type scale ranging from 1 (strongly disagree) to 7 (strongly agree)                    |
| Grid Measure of Empathy [Unnamed]                                  | 1972           | Self-Report              | No Subscales                                                                                                                                                                                                                                            | N/a                   |                                                                                                                                                                                                    |                                                                                                       |
| Griffith Empathy Measure (GEM)                                     | 2007           | Peer/Corollary Report    | (cognitive factor) (affective factor)                                                                                                                                                                                                                   | 23                    | "My child gets upset with he/she sees an animal being hurt"<br>"It makes my child sad to see another child who can't find anyone to play with"                                                     | nine-point Likert scale from strongly disagree (4) to strongly agree (+4)                             |
| Groningen Reflection Ability Scale (GRAS)                          | 2007           | Self-Report              | (self-reflection) (empathetic reflection) (reflective communication)                                                                                                                                                                                    | 23                    | "I can empathize with someone else's situation"<br>"I am able to understand people with a different culture/religious background"                                                                  | 5-point Likert-type scale ranging from 1 (disagree strongly) to 5 (agree strongly)                    |
| Group Questionnaire (GQ)                                           | 2009           | Self-Report              | (positive bonding relationship) (positive working relationship) (negative relationship)                                                                                                                                                                 | 30                    |                                                                                                                                                                                                    |                                                                                                       |
| Group-Analysis-Empathy 1 (GA-Em1)                                  | 2007           | Self-Report              | (emotional disclosure and sensibility) (containing and metabolizing) (immersion) (resonance and responsiveness) (insight)                                                                                                                               | 40                    |                                                                                                                                                                                                    |                                                                                                       |
| Group-Analysis-Empathy 2 (GA-Em2)                                  | 2007           | Self-Report              | (emotional disclosure and sensibility) (containing and metabolizing) (immersion) (resonance and responsiveness) (insight)                                                                                                                               | 40                    |                                                                                                                                                                                                    |                                                                                                       |
| Hate Crime Beliefs Scale - UK (HCBS-UK)                            | 2021           | Self-Report              | (denial) (compassion) (sentencing)                                                                                                                                                                                                                      | 20                    | "Offenders who target Muslims based on their race deserve a harsher sentence."<br>"A hate crime offender should receive a lengthier prison sentence."                                              | NA                                                                                                    |
| Hate Crime Beliefs Scale (HCBS)                                    | 2018           | Self-Report              | (denial) (compassion) (sentencing)                                                                                                                                                                                                                      | 46                    | "I am someone who is helpful and unselfish with others"<br>"I am someone who worries a lot"                                                                                                        | 5-point Likert-type scale ranging from 1 (disagree strongly) to 5 (agree strongly)                    |

| Instrument                                                                    | Published Year | Type of Measure          | Subscales/ Forms                                                                                                                                                                             | Total Number of Items | Sample Item(s)                                                                                                                                                                                                                              | Response set                                                                       |
|-------------------------------------------------------------------------------|----------------|--------------------------|----------------------------------------------------------------------------------------------------------------------------------------------------------------------------------------------|-----------------------|---------------------------------------------------------------------------------------------------------------------------------------------------------------------------------------------------------------------------------------------|------------------------------------------------------------------------------------|
| Health Care Providers Attitudes Toward FGM/C and Those who Practice           | 2021           | Self-Report              | (Attitudes) (Empathetic Attitudes)                                                                                                                                                           | 12                    | "FGM/C is a violation of human rights."<br>"Communities that practice FGM/C are honoring an important cultural tradition."                                                                                                                  | four-point Likert scale from "4 = Strongly Agree" to "1 = Strongly Disagree"       |
| Health Care Providers Confidence in FGM/C Care                                | 2021           | Self-Report              | (Confidence in Clinical FGM/C Care) (Confidence in Critical Communication Skills for FGM/C Care)                                                                                             | 8                     | "Respond to the health concerns of women with FGM/C by engaging in non-judgmental listening."<br>"Create a positive therapeutic relationship with a patient who refuses a recommended procedure."                                           | four-point Likert scale from "4 = Strongly Agree" to "1 = Strongly Disagree"       |
| Health Coaching Index (HCI)                                                   | 2021           | Behavioural/Expert Coder | (Long-term vision, designing goals & actions, and self-monitoring) (Use a self-discovery process) (Match information to client interest and needs) (Have a client-centered/mindful approach) | 18                    | "Collaborative partnership"<br>"Express empathy"                                                                                                                                                                                            | 3-point scale: 0 (not yet competent), 1 (competent), 2 (proficient)                |
| Health Communication Assessment Tool© (HCAT©)                                 | 2013           | Self-Report              | (rapport) (power sharing) (education/empowering) (empathy) (avoiding miscommunication)                                                                                                       | 24                    | "Used positive communication including smile to encourage interaction"<br>"Leaned towards the speaker to show listening intently"                                                                                                           | three-point rating scale of yes, no, and unsure                                    |
| Helpful Responses Questionnaire (HRQ)                                         | 1991           | Behavioural/Expert Coder | No Subscales                                                                                                                                                                                 | 6                     | "Last night Joe really got high and he came home late and we had a big fight. He yelled at me and I yelled back and then he hit me hard! He broke a window and the TV set, too!<br>It was like he was crazy. I just don't know what to do!" | Free response                                                                      |
| Helpful Responses to Refugees Questionnaire (HRRQ)                            | 2015           | Behavioural/Expert Coder | No Subscales                                                                                                                                                                                 | 5                     | "Last night Joe really got high and he came home late and we had a big fight. He yelled at me and I yelled back and then he hit me hard! He broke a window and the TV set, too!<br>It was like he was crazy. I just don't know what to do!" | Free response                                                                      |
| Hogan Empathy Scale (HES)                                                     | 1969           | Self-Report              | No Subscales                                                                                                                                                                                 | 64                    | "As a rule I have little difficulty in 'putting myself into other people's shoes'"<br>"I have seen some things so sad that I almost felt like crying"                                                                                       |                                                                                    |
| Hospice Volunteer as Patient Advocate (HVPA) Scale                            | 1998           | Self-Report              | (patient rights) (volunteer duty)                                                                                                                                                            | 25                    | "My failures are due to the people surrounding me"<br>"My life depends on myself"                                                                                                                                                           | 5-point Likert-type scale ranging from 1 (disagree strongly) to 5 (agree strongly) |
| Hospital Nurse Interpersonal Empathy Questionnaire (HNEIQ)                    | 2018           | Self-Report              | (empathetic and ethical attention) (perspective adoption) (emotional affectability) (altruism) (emotion identification and responsiveness) (reflection forecasting)                          | 45                    | "Colleagues' grief and sorrow make me feel bad"<br>"I feel unhappy at disrespect towards a colleague"                                                                                                                                       | 5-point Likert-type scale ranging from 1 (rarely) to 5 (always)                    |
| Huddersfield Service User Pedagogy Scale                                      | 2018           | Self-Report              | (service user involvement in teaching) (learning in response to service user involvement in teaching)                                                                                        | 19                    | "Service users' feelings are much more important than keeping to appointment times"<br>"The service user's story is the most important aspect in making professional decisions"                                                             | 5-point Likert-type scale ranging from 1 (disagree strongly) to 5 (agree strongly) |
| Human Empathetic Listening Test (HELT)                                        | 1976           | Self-Report              | (understanding) (interest) (responsibility)                                                                                                                                                  | 60                    |                                                                                                                                                                                                                                             |                                                                                    |
| Human Factors Skills for Healthcare Instrument - Auxiliary Version (HuFSHI-A) | 2019           | Self-Report              | No Subscales                                                                                                                                                                                 | 12                    | "When my colleagues are upset, I can help them calm down"<br>"I can show others that I care, even when I am under stress"                                                                                                                   | scale from 1 to 10                                                                 |
| Humanised Care Assessment Tool (HCAT)                                         | 2018           | Self-Report              | No Subscales                                                                                                                                                                                 | 109                   | "I feel I should give something back to others"<br>"Because I had cancer I am more understanding of what other people feel"                                                                                                                 | 5-point Likert-type scale ranging from 1 (strongly disagree) to 5 (strongly agree) |
| Humanistic Relationship Importance Scale (HRIS)                               | 2010           | Self-Report              | (relational availability) (promoting quality of daily life) (recognizing and supporting choice) (forming connections) (supporting human uniqueness)                                          | 93                    | "The nurses take time to listen to your concerns"<br>"You and the nurses feel close to each other"                                                                                                                                          | 5-point scale from "not important" to "very important"                             |
| Illness Invalidation Inventory (3*1)                                          | 2010           | Self-Report              | (spouse) (family) (medical professionals) (work environment and social services)                                                                                                             | 8                     | "Spouse/family/medical professionals/work environment/social services takes me seriously"<br>"...Thinks I should be tougher"                                                                                                                | five-point Likert-type scale (1 = never to 5 = very often)                         |
| Impact of Cancer Scale - Version 2 (IOCv2)                                    | 2006           | Self-Report              | (altruism and empathy) (health awareness) (meaning of cancer) (positive self-evaluation) (appearance concerns) (body change concerns) (life interferences) (worry)                           | 27                    | "Having had cancer has made me more willing to help others"<br>"Because I had cancer I am more understanding of what other people feel"                                                                                                     | 5-point Likert-type scale ranging from 1 (strongly disagree) to 5 (strongly agree) |
| Implicit Relational Assessment Procedure (IRAP)                               | 2014           | Self-Report              | No Subscales                                                                                                                                                                                 | 24                    | "When times are really difficult, I tend to be tough on myself"<br>"When something painful happens, I try to take a balanced view of the situation"                                                                                         | 7-point Likert-type scale ranging from 1 (completely false) to 7 (completely true) |
| Impulsiveness-Venturesomeness-Empathy Questionnaire [Unnamed]                 | 1978           | Self-Report              | (impulsiveness) (venturesomeness) (empathy)                                                                                                                                                  | 63                    | "Do you often get emotionally involved with your friends' problems"<br>"Do unhappy people who are sorry for themselves irritate you"                                                                                                        | yes/no                                                                             |

| Instrument                                                        | Published Year | Type of Measure       | Subscales/ Forms                                                                                                                                                               | Total Number of Items | Sample Item(s)                                                                                                                                                                                                                                                                                  | Response set                                                                                       |
|-------------------------------------------------------------------|----------------|-----------------------|--------------------------------------------------------------------------------------------------------------------------------------------------------------------------------|-----------------------|-------------------------------------------------------------------------------------------------------------------------------------------------------------------------------------------------------------------------------------------------------------------------------------------------|----------------------------------------------------------------------------------------------------|
| Index of Empathetic Concern                                       | 1972           | Self-Report           | (positive adjectives) (negative adjectives)                                                                                                                                    | 13                    | "It makes me sad to see a lonely stranger in a group"<br>"I tend to get emotionally involved in a friend's problems"                                                                                                                                                                            | Likert-type scale                                                                                  |
| Index of Responding                                               | 1984           | Self-Report           | (negative affect factor) (contrasting affect factor)                                                                                                                           | 8                     |                                                                                                                                                                                                                                                                                                 |                                                                                                    |
| Insanity Defense Attitude - Revised (IDA-R) Scale                 | 2004           | Self-Report           | (strict liability) (injustice and danger)                                                                                                                                      | 19                    | "We should punish people who commit criminal acts, regardless of their degree of mental disturbance"<br>"Some people with severe mental illness are out of touch with reality and do not understand that their acts are wrong. These people cannot be blamed and do not deserve to be punished" | 7-point Likert-type scale ranging from 1 (strongly disagree) to 7 (strongly agree)                 |
| Integrity Scale                                                   | 2008           | Self-Report           | No Subscales                                                                                                                                                                   | 18                    |                                                                                                                                                                                                                                                                                                 | 1 = strongly disagree; 7= strongly agree                                                           |
| Interaction with Disabled Persons Scale (IDP)                     | 1992           | Self-Report           | (discomfort) (sympathy)                                                                                                                                                        | 20                    | "I feel uncomfortable and find it hard to relax."<br>"I feel frustrated because I don't know how to help."                                                                                                                                                                                      | 5-point scale ranging from "Strongly Agree" to "Strongly Disagree"                                 |
| Interconnectedness Scale                                          | 2020           | Self-Report           | (well-being) (mindfulness) (nonattachment)                                                                                                                                     | 25                    | When I hear about someone (a stranger) going through a difficult time, I feel a great deal of compassion for him or her                                                                                                                                                                         | 7-point Likert scale from 1 (not at all true of me) to 7 (very true of me)                         |
| Intercultural Effectiveness Scale (IES)                           | 1991           | Self-Report           | (communication competence) (personality traits) (cultural empathy) (communication behavior)                                                                                    | 20                    |                                                                                                                                                                                                                                                                                                 |                                                                                                    |
| International Personality Item Pool (IPIP)                        | 1999           | Self-Report           | (benevolence) (entitlement)                                                                                                                                                    | 8                     |                                                                                                                                                                                                                                                                                                 |                                                                                                    |
| Interpersonal and Social Empathy Index (ISEI)                     | 2013           | Self-Report           | (macro perspective-taking) (cognitive empathy) (self-other awareness) (affective response)                                                                                     | 32                    | "I am good at understanding other people's emotions"<br>"When I am with someone who gets a bad news, I feel sad for a moment too"                                                                                                                                                               | 6-point Likert-type scale that ranged from never (1) to always (6)                                 |
| Interpersonal Communication Assessment Scale (ICAS)               | 2006           | Self-Report           | (advocacy) (therapeutic use of self) (validation)                                                                                                                              | 23                    | "Acknowledges concerns"<br>"Observes for needed emotional support"                                                                                                                                                                                                                              | Likert-type scale (1 = seldom; 2 = often; 3 = usually; 4 = always)                                 |
| Interpersonal Communication Competence Scale (ICCS)               | 1994           | Self-Report           | (self-disclosure) (empathy) (social relaxation) (assertiveness) (interaction management) (altercentrism) (expressiveness) (supportiveness) (immediacy) (environmental control) | 30                    | "How often do you have difficulties understanding other's feelings"<br>"How often are you able to put yourself in others' shoes"                                                                                                                                                                | 5-point Likert-scale (almost never = 1, seldom = 2, sometimes = 3, often = 4, almost always = 5)   |
| Interpersonal Guilt Rating Scale –15 Self-Report (IGRS-15s)       | 2018           | Self-Report           | (survivor guilt) (omnipotent guilt) (self-hate)                                                                                                                                | 15                    | "When someone is feeling down, I can usually understand how they feel"<br>"I get caught up in other people's feelings easily"                                                                                                                                                                   | 5-point Likert-type scale ranging from 1 (strongly disagree) to 5 (strongly agree)                 |
| Interpersonal Quality of Family Planning Scale (IQFP)             | 2018           | Peer/Corollary Report | No Subscales                                                                                                                                                                   | 11                    | "Respecting me as a person"<br>"Showing care and compassion"                                                                                                                                                                                                                                    | 5-point Likert scale ranging from poor to excellent                                                |
| Interpersonal Reactivity Index - Brief Form (B-IRI)               | 1980           | Self-Report           | (fantasy) (perspective taking) (empathic concern) (personal distress)                                                                                                          | 16                    | "I tend to lose control during emergencies"<br>"When I am reading an interesting story or novel, I imagine how I would feel if the events in the story were happening to me"                                                                                                                    | 5-point Likert-type scale ranging from 0 (does not describe me well) to 4 (describes me very well) |
| Interpersonal Reactivity Index (IRI)                              | 1980           | Self-Report           | (perspective taking) (fantasy) (empathic concern) (personal distress)                                                                                                          | 28                    | "I tend to lose control during emergencies"<br>"When I am reading an interesting story or novel, I imagine how I would feel if the events in the story were happening to me"                                                                                                                    | 5-point Likert-type scale ranging from 0 (does not describe me well) to 4 (describes me very well) |
| Interpersonal Regulation Questionnaire (IRQ)                      | 2018           | Self-Report           | (negative tendency) (negative efficacy) (positive tendency) (positive efficacy)                                                                                                | 16                    | "When I'm having trouble, I can't wait to tell someone about it"<br>"I appreciate having others' support through difficult times"                                                                                                                                                               | 7-point Likert-type scale ranging from 1 (strongly disagree) to 7 (strongly agree)                 |
| Interview Satisfaction Questionnaire (ISQ)                        | 2011           | Self-Report           | (opportunity to disclose concerns) (physician's empathy) (confidence in physician's abilities) (general satisfaction)                                                          | 12                    | "The physician gave me undivided attention"<br>"The physician tried to make me feel relaxed"                                                                                                                                                                                                    | 5-point Likert-type scale ranging from 1 (strongly disagree) to 5 (strongly agree)                 |
| Inventory of Beliefs about Wife Beating (IBWB)                    | 1987           | Self-Report           | (wife beating is justified) (wives gain from beatings) (help should be given) (offender should be punished) (offender is responsible)                                          | 36                    | "Social agencies should do more to help battered women"<br>"There is no excuse for a man beating his wife."                                                                                                                                                                                     | 7-point Likert-type scale ranging from 1 (strongly disagree) to 7 (strongly agree)                 |
| Inventory of Callous-Unemotional (ICU) Parent-Report Form         | 2004           | Peer/Corollary Report | (callous-unemotional) (empathic-prosocial) (uncaring factors)                                                                                                                  | 24                    | "I express my feelings openly"<br>"I feel bad or guilty when I do something wrong"                                                                                                                                                                                                              | 4-point Likert scale, ranging from 0 (Not at all true) to 3 (Definitely True)                      |
| Inventory of Callous-Unemotional Traits (ICU)                     | 2004           | Peer/Corollary Report | (empathic-prosocial) (callous-unemotional)                                                                                                                                     | 24                    | "I express my feelings openly"<br>"I feel bad or guilty when I do something wrong"                                                                                                                                                                                                              | 4-point Likert scale, ranging from 0 (Not at all true) to 3 (Definitely True)                      |
| Inventory of Cross-Cultural Sensitivity (ICCS)                    | 1986           | Self-Report           | No Subscales                                                                                                                                                                   | 32                    | "I speak only one language"<br>"The way other people express themselves is very interesting to me"                                                                                                                                                                                              | 1 Strongly Agree to 7 - Strongly Disagree                                                          |
| Inventory of Motivations for Palliative Care Volunteerism (IMPCV) | 2004           | Self-Report           | (altruism) (civic responsibility) (self-promotion) (leisure) (personal gain)                                                                                                   | 25                    | "It is my responsibility to help others"<br>"I want to make others happy and comfortable in life, as well as in death"                                                                                                                                                                          | 6-point scale from 0 (does not describe me well) to 5 (describes me very well)                     |

| Instrument                                                                 | Published Year | Type of Measure          | Subscales/ Forms                                                                                                                                                        | Total Number of Items | Sample Item(s)                                                                                                                                                                         | Response set                                                                                                                                                                                                  |
|----------------------------------------------------------------------------|----------------|--------------------------|-------------------------------------------------------------------------------------------------------------------------------------------------------------------------|-----------------------|----------------------------------------------------------------------------------------------------------------------------------------------------------------------------------------|---------------------------------------------------------------------------------------------------------------------------------------------------------------------------------------------------------------|
| Inventory of Personality Organization (IPO)                                | 2001           | Self-Report              | (Psychological Defenses) (Identity Diffusion) (Reality Testing)                                                                                                         | 155                   |                                                                                                                                                                                        |                                                                                                                                                                                                               |
| Jefferson Scale for Physician Empathy - Student Version (JSPE-S)           | 2001           | Peer/Corollary Report    | (perspective taking) (compassionate care) (standing in the patient's shoes)                                                                                             | 20                    | "It is difficult for me to view things from my patients' perspective"<br>"Patients feel better when their health care providers understand their feelings."                            | 7-point Likert-type scale ranging from 1 (strongly disagree) to 7 (strongly agree)                                                                                                                            |
| Jefferson Scale for Physician Empathy for Observers (JSEO)                 | 2016           | Behavioural/Expert Coder | No Subscales                                                                                                                                                            | 5                     | "Can view things from the patient's perspective (see things as the patient would)"<br>"Asks about what is happening in the patient's daily life"                                       | 7-point scale (1 = Strongly Disagree, 7 = Strongly Agree)                                                                                                                                                     |
| Jefferson Scale of Attitudes toward Physician–Nurse Collaboration (JSAPNC) | 2001           | Self-Report              | (shared education and collaboration) (physician–nurse collaboration) (physician's authority)                                                                            | 15                    | "It is difficult for me to view things from my patients' perspective"<br>"Patients feel better when their health care providers understand their feelings."                            | 7-point Likert-type scale ranging from 1 (strongly disagree) to 7 (strongly agree)                                                                                                                            |
| Jefferson Scale of Empathy - Health Profession Students (JSE-HPS)          | 2016           | Self-Report              | No Subscales                                                                                                                                                            | 20                    | "It is difficult for me to view things from my patients' perspective"<br>"Patients feel better when their health care providers understand their feelings."                            | 7-point Likert-type scale ranging from 1 (strongly disagree) to 7 (strongly agree)                                                                                                                            |
| Jefferson Scale of Empathy - Law Students (JSE-LS)                         | 2001           | Self-Report              | (understanding the client's perspective) (responding to clients' experiences and emotions) (responding to clients' cues and behaviors) (standing in the client's shoes) | 20                    | "It is difficult for me to view things from my patients' perspective"<br>"Patients feel better when their health care providers understand their feelings."                            | 7-point Likert-type scale ranging from 1 (strongly disagree) to 7 (strongly agree)                                                                                                                            |
| Jefferson Scale of Empathy - Medical Student Version (JSE-MS)              | 2002           | Self-Report              | No Subscales                                                                                                                                                            | 20                    | "It is difficult for me to view things from my patients' perspective"<br>"Patients feel better when their health care providers understand their feelings."                            | 7-point Likert-type scale ranging from 1 (strongly disagree) to 7 (strongly agree)                                                                                                                            |
| Jefferson Scale of Empathy (JSE)                                           | 2001           | Self-Report              | (perspective taking) (compassionate care) (standing in the patient's shoes)                                                                                             | 20                    | "It is difficult for me to view things from my patients' perspective"<br>"Patients feel better when their health care providers understand their feelings."                            | 7-point Likert-type scale ranging from 1 (strongly disagree) to 7 (strongly agree)                                                                                                                            |
| Jefferson Scale of Empathy for Observers (JSEO)                            | 2017           | Peer/Corollary Report    | No Subscales                                                                                                                                                            | 5                     | "It is difficult for me to view things from my patients' perspective"<br>"Patients feel better when their health care providers understand their feelings."                            | 7-point Likert-type scale ranging from 1 (strongly disagree) to 7 (strongly agree)                                                                                                                            |
| Jefferson Scale of Patient's Perception of Physician Empathy (JSPPE)       | 2007           | Self-Report              | No Subscales                                                                                                                                                            | 5                     | "The doctor...(1) can view things from my perspective (see things as I see them)"<br>"The doctor...(2) asks about what is happening in my daily life."                                 | 7-point Likert scale, with responses ranging from 1 (strongly disagree) to 7 (strongly agree)                                                                                                                 |
| Jefferson Scale of Physician Empathy (JSPE)                                | 2001           | Self-Report              | (perspective taking) (compassionate care) (standing in patient's shoes)                                                                                                 | 20                    | "It is difficult for me to view things from my patients' perspective"<br>"Patients feel better when their health care providers understand their feelings."                            | 7-point Likert-type scale ranging from 1 (strongly disagree) to 7 (strongly agree)                                                                                                                            |
| Kids' Empathic Development Scale (KEDS)                                    | 2012           | Behavioural/Expert Coder | (cognitive) (affective) (behavioral)                                                                                                                                    | 13                    |                                                                                                                                                                                        |                                                                                                                                                                                                               |
| Kiersma-Chen Empathy Scale (KCES)                                          | 2013           | Self-Report              | No Subscales                                                                                                                                                            | 15                    | "Health care providers should try to stand in their patients' shoes when providing care to them"<br>"Patients feel better when their health care provider understand their feelings"   | 7-point Likert scale from 1 (strongly disagree) to 7 (strongly agree)                                                                                                                                         |
| Kiersma-Chen Empathy Scale Patient Scale (KCES-PV)                         | 2013           | Peer/Corollary Report    | (Global empathy belief) (Health care professional's empathy ability)                                                                                                    | 14                    |                                                                                                                                                                                        | 8 response categories (Part 1: 1 = unnecessary, 4 = moderately necessary, 7 = extremely necessary; Part 2: 1 = does not describe me, 4 = describes me moderately well, 7 = describes me extremely well)       |
| Kiersma-Chen Empathy Scale Revised Version (KCES-R)                        | 2013           | Self-Report              | (Global empathy belief) (Personal empathy ability)                                                                                                                      | 14                    |                                                                                                                                                                                        | 7 response categories (Part 1: 1 = unnecessary, 4 = moderately necessary, 7 = extremely necessary; Part 2: 1 = does not describe them, 4 = describes them moderately well, 7 = describes them extremely well) |
| Kindness Scale                                                             | 2021           | Self-Report              | (Affective-Socially Prescribed) (Affective-Proactive) (Principle-Socially Prescribed) (Principle-Proactive) (Anthropophilia)                                            | 45                    | "I open doors to let people through"<br>"I think it is right to give everyone a fair chance"                                                                                           |                                                                                                                                                                                                               |
| Kirk Adoption Questionnaire (KAQ)                                          | 1981           | Self-Report              | (AOD) (Empathy) (Communication)                                                                                                                                         | 14                    | "How frequently have you wondered whether the birth mother ever thinks about the child?"<br>"How frequently have you recalled at one time the child legally belonged to someone else?" | 4-point Likert scale (1 = never, 2 = infrequently, 3 = sometimes, 4 = often)                                                                                                                                  |
| Knee Osteoarthritis Expectations Questionnaire                             | 2011           | Self-Report              | (expectations for education) (expectations for information) (expectations for physician empathy)                                                                        | 60                    | "I expect that my physician takes time to listen to me"<br>"Takes into consideration all the problems I have in my daily living activities because of my knee"                         | 11-point Likert scales from 0 (disagree) to 10 (agree)                                                                                                                                                        |

| Instrument                                                           | Published Year | Type of Measure          | Subscales/ Forms                                                                                                                                                                           | Total Number of Items | Sample Item(s)                                                                                                                                         | Response set                                                                                                                    |
|----------------------------------------------------------------------|----------------|--------------------------|--------------------------------------------------------------------------------------------------------------------------------------------------------------------------------------------|-----------------------|--------------------------------------------------------------------------------------------------------------------------------------------------------|---------------------------------------------------------------------------------------------------------------------------------|
| Leeds Satisfaction Questionnaire                                     | 1992           | Self-Report              | (overall satisfaction) (information) (empathy) (technical competence) (attitude) (access and continuity)                                                                                   | 58                    | "The seats in the waiting area are very comfortable"<br>"There are always a lot of people attending the clinic"                                        | Strongly agree to Strongly disagree                                                                                             |
| Level of Personality Functionin Scale - Brief Form 2.0 (LPFS-BF 2.0) | 2016           | Self-Report              | (Self) (Interpersonal)                                                                                                                                                                     | 12                    |                                                                                                                                                        |                                                                                                                                 |
| Level of Personality Functioning Scale - Self Report (LPFS-SR)       | 2017           | Self-Report              | (Identity) (Self-Direction) (Empathy) (Intimacy)                                                                                                                                           | 80                    |                                                                                                                                                        |                                                                                                                                 |
| Level of Personality Functioning Scale (LPFS)                        | 2016           | Self-Report              | (identity) (self-direction) (empathy) (intimacy)                                                                                                                                           | 80                    | "I don't have a clue about why other people do what they do"<br>"Many people around me have very destructive motives"                                  | 4-point scale ranging from Totally False, not at all True to Very True                                                          |
| Levenson Self-Report Psychopathy Scale                               | 1995           | Self-Report              | (callousness) (antisocial) (egocentricity)                                                                                                                                                 | 26                    | "I make a point of trying not to hurt others in pursuit of my goals"<br>"I feel bad if my words or actions cause someone else to feel emotional pain"  | 4-point Likert-type scale ranging from 1 (strongly disagree) to 4 (strongly agree)                                              |
| Limited Prosocial Emotions Questionnaire (LPEQ)                      | 2020           | Self-Report              | No Subscales                                                                                                                                                                               | 6                     | "Lacks guilt after he or she misbehaves or hurts someone"<br>"Lacks empathy for or caring about others who are hurt, sad, or distressed"               | 4-point Likert-type scale ranging from 1 (not at all like this) to 4 (very much like this)                                      |
| Machiavellian Personality Scale (MPS)                                | 2009           | Self-Report              | (distrust of others) (desire for status) (desire for control) (amorality)                                                                                                                  | 16                    | "I feel others needs"<br>"I have a good word for everyone"                                                                                             | a five-point Likert scale (1 = strongly disagree, 2 = disagree, 3 = neither agree nor disagree, 4 = agree, 5 = strongly agree). |
| Marital Communication Inventory (MCI)                                | 1970           | Self-Report              | (regard) (self-disclosure anxiety) (aversive communication) (empathy) (discuss)                                                                                                            | 46                    | "My spouse understands my words but not my feelings"<br>"My spouse does not realize how strongly I feel about things"                                  | 9-point Likert-type scale                                                                                                       |
| Measure of Caring in Nursing as Communicative Action [Unnamed]       | 1995           | Self-Report              | (caring identity) (patient focus scale) (professionalism) (nurse-patient interaction) (trusting partnership) (communicative mutuality) (responsibilities of care) (nursing practice scale) | 102                   | "To me, patients are more than illness problems"<br>"My own feelings give me insights into my patients"                                                | 6-category rating scale extending from Very Strongly Agree to Very Strongly Disagree                                            |
| Measure of Empathy in Early Childhood (MEEC)                         | 2023           | Peer/Corollary Report    | (Attention to Others' Emotions) (Personal Distress (i.e., Emotional Contagion/Affective Empathy)) (Personal Distress-Fictional Characters) (Prosocial Behavior) (Sympathy)                 | 35                    | "My child comforts me when I am upset"<br>"When I am hurt, my child comes over and checks on me"                                                       | 4-point response scale from 1 (strongly disagree) to 4 (strongly agree)                                                         |
| Measure of Expressed Empathy                                         | 2002           | Behavioural/Expert Coder | No Subscales                                                                                                                                                                               | 20                    |                                                                                                                                                        |                                                                                                                                 |
| Measure of Orientations Toward Empathic and Sympathetic Care         | 2010           | Self-Report              | (empathic response) (sympathetic involvement)                                                                                                                                              | 4                     | "I often have tender, concerned feelings for people less fortunate than me"<br>"I tend to lose control during an emergency"                            | five-point Likert-like scale (0 = Does not describe me well; 4 = Describes me very well)                                        |
| Measure of Relational Climate [Unnamed]                              | 2020           | Self-Report              | (shared vision) (compassion) (relational energy)                                                                                                                                           | 12                    | "Members of my organization are empathetic toward each other"<br>"People in my organization notice when others are in need"                            | five-point Likert scale ranging from 1 = very weak fit to 5 = very strong fit                                                   |
| Medical Condition Regard Scale (MCRS)                                | 2002           | Self-Report              | (positive regard) (negative regard)                                                                                                                                                        | 11                    | "I feel especially compassionate toward patients like this"<br>"Patients like this irritate me"                                                        | 6-point Likert scale (1 = strongly disagree, 6 = strongly agree)                                                                |
| Medical Humanities Questionnaire                                     | 2011           | Self-Report              | (professionalism) (caring and empathy) (patient orientation) (disclosure of harm) (communication)                                                                                          | 19                    |                                                                                                                                                        |                                                                                                                                 |
| Mental States Task (MST)                                             | 2013           | Self-Report              | (concrete thinking) (low defensive level) (intermediate defensive level) (objective-rational) (high defensive level) (reflective thinking)                                                 | 24                    | "I thought that what the character was going through was not that bad"<br>"The character's situation moved me, but I was not overwhelmed with sadness" | 7-point Likert-type scale ranging from 1 (strongly disagree) to 7 (strongly agree)                                              |
| Mentalized Affectivity Scale (MAS)                                   | 2017           | Self-Report              | (identifying emotions) (processing emotions) (expressing emotions)                                                                                                                         | 60                    | "If I feel something, I will convey it to others"<br>"It is hard for me to talk about my complex emotions"                                             | four point scale (strongly disagree, slightly disagree, slightly agree, or strongly agree)                                      |
| Military Suicide Attitudes Questionnaire Short-Form (MSAQ-SF)        | 2022           | Self-Report              | (discomfort) (unacceptability) (support) (empathic views)                                                                                                                                  | 18                    | "A service member who attempts suicide deserves understanding and empathy."<br>"People who attempt suicide should be given time to receive help."      | 5-point Likert scale (1 = strongly disagree to 5 = strongly agree)                                                              |
| Millennial Organizational Citizenship Behavior (OCB) Scale           | 2021           | Self-Report              | (Empathetic Responsiveness) (Professional Development) (Role Modeling) (Social Responsibility)                                                                                             | 13                    | "I empathetically respond to my coworkers' feelings"<br>"I show sensitivity to my coworkers' emotional condition"                                      | seven-point Likert scale ranging from 1 (strongly disagree) to 7 (strongly agree)                                               |
| Mindful Attention Awareness Scale (MAAS)                             | 2003           | Self-Report              | No Subscales                                                                                                                                                                               | 15                    | I find it difficult to stay focused on waht is happening in the present                                                                                | 6-point Likert scale ranging from 1 (almost always) to 6 (almost never)                                                         |



| Instrument                                                  | Published Year | Type of Measure | Subscales/ Forms                                                                                                                                                                  | Total Number of Items | Sample Item(s)                                                                                                                                                                                                                                           | Response set                                                                                                                                                                                                                 |
|-------------------------------------------------------------|----------------|-----------------|-----------------------------------------------------------------------------------------------------------------------------------------------------------------------------------|-----------------------|----------------------------------------------------------------------------------------------------------------------------------------------------------------------------------------------------------------------------------------------------------|------------------------------------------------------------------------------------------------------------------------------------------------------------------------------------------------------------------------------|
| Mindful Parenting Inventory for Children (MPIC)             | 2023           | Self-Report     | (Self-Regulation in Parenting) (Acceptance and Compassion towards Child) (Being in the Moment with Child) (Awareness of Child)                                                    | 18                    | NA                                                                                                                                                                                                                                                       | 5-point Likert scale (never true = 1 to always true = 5)                                                                                                                                                                     |
| Mindful Parenting Inventory for Parents (MPIP)              | 2023           | Self-Report     | (Self-Regulation in Parenting) (Acceptance and Compassion towards Child) (Being in the Moment with Child) (Awareness of Child)                                                    | 18                    | null                                                                                                                                                                                                                                                     | 5-point Likert scale (never true = 1 to always true = 5)                                                                                                                                                                     |
| Mindful Self-Care Scale (MSCS)                              | 2017           | Self-Report     | (physical care) (supportive relationships) (mindful awareness) (self-compassion and purpose) (mindful relaxation) (supportive structure)                                          | 84                    | "Reminded myself that failure and challenges are a part of the human experience"<br>"Engaged in supportive and comforting self-talk"                                                                                                                     | 5 point Likert-type response anchors consisting of "strongly dislike," "slightly dislike," "neutral," "slightly like," or "strongly like,"                                                                                   |
| Minnesota Multiphasic Personality Inventory-2 (MMPI-2)      | 1943           | Self-Report     | (hypochondriasis) (depression) (conversion hysteria) (psychopathic deviate) (masculinity/femininity) (paranoia) (psychasthenia) (schizophrenia) (hypomania) (social introversion) | 567                   | "A sad movie makes me feel like crying"                                                                                                                                                                                                                  | 7 point Likert-type response anchors consisting of (1) Never, (2) Very rarely, (3) Rarely, (4) Occasionally, (5) Frequently, (6) Very frequently, and (7) Always                                                             |
| Miville-Guzman Universality-Diversity Scale                 | 1987           | Self-Report     | (relativistic appreciation of oneself and others) (diversity of contact) (sense of connection)                                                                                    | 45                    | "I often have tender, concerned feelings for people less fortunate than me"<br>"Sometimes I don't feel very sorry for other people when they are having problems"                                                                                        | 6 point Likert-type scale                                                                                                                                                                                                    |
| Modified Version of Empathic Accuracy Task (EAT)            | 2009           | Self-Report     | No Subscales                                                                                                                                                                      | 27                    | picture items                                                                                                                                                                                                                                            | rate the perceived emotional intensity of each target using a 9-point scale from 1 (no emotion) to 9 (very strong emotion)                                                                                                   |
| Moral Courage Scale for Physicians (MCSP)                   | 2006           | Self-Report     | No Subscales                                                                                                                                                                      | 12                    | "It is difficult for me to view things from my patients' perspective"<br>"Patients feel better when their health care providers understand their feelings."                                                                                              | 7-point Likert-type scale ranging from 1 (strongly disagree) to 7 (strongly agree)                                                                                                                                           |
| Moral Expansiveness Scale (MES)                             | 2016           | Self-Report     | No Subscales                                                                                                                                                                      | 30                    | "I often have tender, concerned feelings for people less fortunate than me"<br>"Sometimes I don't feel very sorry for other people when they are having problems"                                                                                        | 5 point Likert scale from 1- does not describe me well to 5, describes me very well                                                                                                                                          |
| Moral Foundations Questionnaire - Revised (MFQ-r)           | 2021           | Self-Report     | (Traditionalism) (Compassion) (Liberty)                                                                                                                                           | 41                    | "I think everyone should be free to do as they choose, so long as they don't infringe upon the equal freedoms of others"<br>"I think it's morally wrong that rich children inherit a lot of money while poor children inherit nothing"                   | 6-point Likert scale                                                                                                                                                                                                         |
| Moral Foundations Questionnaire (MFQ)                       | 2011           | Self-Report     | (harm) (fairness) (ingroup) (authority) (purity)                                                                                                                                  | 30                    | "Compassion for those who are suffering is the most crucial virtue"<br>"One of the worst things a person could do is hurt a defenseless animal"                                                                                                          | 6-point scale from 1 (strongly disagree) to 6 (strongly agree)                                                                                                                                                               |
| Moral Inclusion/Exclusion of Other Groups Scale (MIEG)      | 2016           | Self-Report     | No Subscales                                                                                                                                                                      | 4                     | "Values held by this group represent a threat to our well-being"<br>"Members of this group deserve no respect"                                                                                                                                           | 7-point scale from 1 = 'strongly disagree' to 7 = 'strongly agree'                                                                                                                                                           |
| Moral Mosaic - Short Form                                   | 1988           | Self-Report     | (psychological adjust) (social activity) (physical adjustment)                                                                                                                    | 65                    | "Encouraged you to talk about your emotional feelings about your illness, encouraged you to talk about your illness experience"<br>"Told you not to worry as everything would be all right, told jokes and chattered to keep your mind off your illness" | scale from 0 (never) to 3 (often)                                                                                                                                                                                            |
| Multi-Dimensional Support Scale (MDSS)                      | 1988           | Self-Report     | (psychological adjust) (social activity) (physical adjustment)                                                                                                                    | 65                    | "Encouraged you to talk about your emotional feelings about your illness, encouraged you to talk about your illness experience"<br>"Told you not to worry as everything would be all right, told jokes and chattered to keep your mind off your illness" | scale from 0 (never) to 3 (often)                                                                                                                                                                                            |
| Multicultural Personality Questionnaire (MPQ)               | 1985           | Self-Report     | (cultural empathy) (open-mindedness) (emotional stability) (social initiative and flexibility)                                                                                    | 78                    | "Pays attention to the emotions of other"<br>"Keeps calm when things don't go well"                                                                                                                                                                      | 5-point Likert-type scale ranging from 1 (not at all applicable) to 5 (totally applicable)                                                                                                                                   |
| Multicultural Personality Questionnaire Short Form (MPQ-SF) | 2000           | Self-Report     | (Cultural Empathy) (Emotional Stability) (Flexibility) (Openmindedness) (Social Initiative)                                                                                       | 40                    |                                                                                                                                                                                                                                                          | 7-point Likert scale (1=not at all applicable; 7=completely applicable)                                                                                                                                                      |
| Multifaceted Empathy Test (MET)                             | 2008           | Self-Report     | (emotional empathy) (cognitive empathy)                                                                                                                                           | 82                    | "How aroused does this picture make you feel?"<br>"How strong is the emotion you feel about this person?"                                                                                                                                                | 9-point Likert-type scale ranging from 1 (minimum levels of arousal (implicit empathy) and empathic concern (explicit empathy)) and 9 (maximum levels of arousal (implicit empathy) and empathic concern (explicit empathy)) |

| Instrument                                                    | Published Year | Type of Measure          | Subscales/ Forms                                                                                                                                                                                  | Total Number of Items | Sample Item(s)                                                                                                                                                                                                                                                                                                   | Response set                                                                                                                             |
|---------------------------------------------------------------|----------------|--------------------------|---------------------------------------------------------------------------------------------------------------------------------------------------------------------------------------------------|-----------------------|------------------------------------------------------------------------------------------------------------------------------------------------------------------------------------------------------------------------------------------------------------------------------------------------------------------|------------------------------------------------------------------------------------------------------------------------------------------|
| Multiple Mini-Interview (MMI)                                 | 2004           | Behavioural/Expert Coder | (moral and ethical values) (interpersonal ability) (academic ability) (communication skills) (critical thinking skills)                                                                           | 21                    | "Kindness, compassion and empathy"<br>"Respect for difference and diversity"                                                                                                                                                                                                                                     | five or seven point Likert-type scale as well as assigning a global rating score which can range from 'excellent' to 'cause for concern' |
| My Emotions Questionnaire                                     | 2004           | Self-Report              | (amusement) (anxiety) (frustration) (sympathy) (protective)                                                                                                                                       | 20                    | "I feel sorry for this baby"<br>"I feel concerned for this baby"                                                                                                                                                                                                                                                 | 5-point Likert scale (1 = very weakly, 2 = weakly, 3 = moderately, 4 = strongly, 5 = very strongly)                                      |
| Narnian Character Virtue Scales (NCVS)                        | 2017           | Self-Report              | No Subscales                                                                                                                                                                                      | 60                    | "Do you often get emotionally involved with your friends' problems"<br>"Do you often long for excitement"                                                                                                                                                                                                        | yes/no                                                                                                                                   |
| Non-Verbal Compassionate Communication Questionnaire          | 2012           | Self-Report              | No Subscales                                                                                                                                                                                      | 24                    | "How do you express compassion towards patients"<br>"How do you show your anger towards patients"                                                                                                                                                                                                                | different answer choices specific to each question                                                                                       |
| Nurse 5-item Compassion Measure                               | 2019           | Peer/Corollary Report    | No Subscales                                                                                                                                                                                      | 5                     | "During this hospital stay, how often do you feel your nurses cared about your emotional or psychological well-being?"<br>"During this hospital stay, how often do you feel your nurses were interested in you as a whole person?"                                                                               | 1 = Never; 2 = Sometimes; 3 = Usually; 4 = Always                                                                                        |
| Nurse-Nursing Assistant-Caregiver Reciprocity Scale (NNA-CRS) | 2013           | Self-Report              | (balanced reciprocal ethical caring team work) (love and affection) (intrinsic rewards)                                                                                                           | 16                    |                                                                                                                                                                                                                                                                                                                  |                                                                                                                                          |
| Nurses' Confidence Scale: Unique Families (NCSUF)             | 2020           | Self-Report              | (skills and resources) (awareness and sensitivity)                                                                                                                                                | 19                    | "I can provide social support (e.g., information, emotional, practical, affirmation) for all unique families under our care"<br>"I can identify and manage my internal conflict when caring for families whose lifestyle choices differ from my own"                                                             | 5-point Likert scale (1 = not confident at all to 5 = very confident)                                                                    |
| Nursing Dimensions Inventory (NDI)                            | 1999           | Self-Report              | No Subscales                                                                                                                                                                                      | 35                    | "Getting to know the patient as a person"<br>"Feeling sorry for a patient"                                                                                                                                                                                                                                       | 5-point Likert-type scale ranging from 1 (strongly disagree) to 5 (strongly agree)                                                       |
| Nursing Motives for Helping Scale (N-MHS)                     | 2006           | Self-Report              | No Subscales                                                                                                                                                                                      | 9                     |                                                                                                                                                                                                                                                                                                                  | Likert scale, where lower scores indicate lesser empathy and altruistic traits in the respondents                                        |
| Nursing Shared Decision-Making Attitude Scale (NSDMA)         | 2021           | Self-Report              | (Empathic communication) (Mastery learning)                                                                                                                                                       | 11                    | "Eager to respect and empathize with patients' preferences and values."<br>"Eager to implement patient-centered care."                                                                                                                                                                                           | 5-point Likert scale, ranging from 1 (strongly disagree) to 5 (strongly agree)                                                           |
| Objective Structured Clinical Evaluation (OSCE)               | 1979           | Peer/Corollary Report    | (empathy) (coherence) (verbal and non-verbal expression)                                                                                                                                          | 10                    |                                                                                                                                                                                                                                                                                                                  |                                                                                                                                          |
| Observed Mindfulness Measure (OMM)                            | 2022           | Peer/Corollary Report    | (mindful awareness) (acceptance) (attentiveness)                                                                                                                                                  | 9                     | Please tell us how frequently each of the following statements would be true about your paired participant                                                                                                                                                                                                       | 1: "Not at all", 2: "Occasionally", 3: "About half the time", 4: "Frequently", 5: "All the time"                                         |
| Open-Minded Cognition Scale [Unnamed]                         | 2015           | Self-Report              | (general) (political) (religious) (open-minded cognition)                                                                                                                                         | 18                    | "I can strongly feel what other people feel"<br>"I care a great deal of what happens to people"                                                                                                                                                                                                                  | 7-point Likert scale from 1 (strongly disagree) to 7 (strongly agree)                                                                    |
| Orientation Model                                             | 2015           | Self-Report              | (cognitive processing) (attachment) (empathy) (introspection)                                                                                                                                     | 10                    | "When I'm upset at someone, I usually try to 'put myself in their shoes' for a while"<br>"I often have tender, concerned feelings for people less fortunate than me"                                                                                                                                             | 5-point Likert-type scale ranging from 1 = not very true of me to 5 = very true of me                                                    |
| OSPA Inventory                                                | 1935           | Self-Report              | (purpose) (sodalness) (sympathy) (poise) (impulse-judgment)                                                                                                                                       |                       | "Did you ever cry over a book or a story"<br>"When you see other people sad does it usually make you sad"                                                                                                                                                                                                        | yes/no                                                                                                                                   |
| Other Dyadic Perspective-Taking Scale (ODPT)                  | 1990           | Self-Report              | (strategies) (cognizance)                                                                                                                                                                         | 23                    | "In my relationship with my partner I believe that there are two sides to every question, and I try to look and think about both sides."<br>"When involved in an argument with me, my partner is the type of person who will consider and take into account my point of view and compare that with his/her own." | 5-point Likert-type scale ranging from 0 (totally disagree) to 4 (totally agree)                                                         |
| Parent Affective and Cognitive Empathy Scale (PACES)          | 1998           | Behavioural/Expert Coder | (affective empathy) (cognitive empathy) (empathic behavior)                                                                                                                                       | 23                    | "[Child] was happy, so I started to feel happy, too."<br>"When [child] told me what her friend had said, I felt angry on her behalf."                                                                                                                                                                            | 11-point scale ranging from -1 (anti-empathic, hostile, rejecting) to 9 (exceptional, insightful)                                        |
| Parental Empathy Measure (PEM)                                | 2005           | Self-Report              | (attention to signals subscale) (behavior-unstressed subscale) (behavior-stressed subscale) (emotion-unstressed subscale) (emotion-stressed subscale) (attributions subscale) (faking good scale) | 24                    |                                                                                                                                                                                                                                                                                                                  |                                                                                                                                          |
| Partner Synchrony Inventory (PSI)                             | 1997           | Self-Report              | (authoritativeness) (empathy) (compliance)                                                                                                                                                        | 15                    |                                                                                                                                                                                                                                                                                                                  |                                                                                                                                          |

| Instrument                                                                 | Published Year | Type of Measure          | Subscales/ Forms                                                                                                                                                                        | Total Number of Items | Sample Item(s)                                                                                                                                                                                 | Response set                                                                                                                                          |
|----------------------------------------------------------------------------|----------------|--------------------------|-----------------------------------------------------------------------------------------------------------------------------------------------------------------------------------------|-----------------------|------------------------------------------------------------------------------------------------------------------------------------------------------------------------------------------------|-------------------------------------------------------------------------------------------------------------------------------------------------------|
| Patient Centeredness Index (PCI)                                           | 2022           | Peer/Corollary Report    | No Subscales                                                                                                                                                                            | 14                    | "They pay attention to my needs."<br>"They talk to me with respect."                                                                                                                           | 0 = Never, 1 = Rarely, 2 = Sometimes, 3 = Usually, 4 = Always, N/A                                                                                    |
| Patient Experience Survey in Radiation Therapy                             | 2019           | Self-Report              | No Subscales                                                                                                                                                                            | 3                     | "My overall experience in Radiation Therapy was great"                                                                                                                                         | 5 point Likert-type scale                                                                                                                             |
| Patient Satisfaction Scale                                                 | 2002           | Self-Report              | (interpersonal) (logistics) (technical)                                                                                                                                                 | 25                    | "Friendly providers"<br>"Providers who listen to me"                                                                                                                                           |                                                                                                                                                       |
| Patient-Physician Relationship Scale - Physician (PPRS-Physician)          | 2020           | Self-Report              | (Interfering attributes) (Positive attributes) (Personal connection)                                                                                                                    | 35                    | "Is grateful for my help"<br>"Is allied with me"                                                                                                                                               | 7-item Likert scale that range from 0 to 6, in which the "Very Undesirable" score = 0, to "Very Desirable" = 6                                        |
| Patient-Reported Compassion Measure [Unnamed]                              | 2020           | Self-Report              | (Virtuous response) (Relational space) (Seeking to understand) (Relational communication) (Attending to needs) (Global Compassion)                                                      | 54                    | "I felt that my Healthcare Providers were compassionate"<br>"I felt that my Healthcare Providers were caring"                                                                                  | 5-point Likert scale: strongly disagree, disagree, neutral, agree, strongly agree                                                                     |
| Patient's Assessment of Quality Scale - Acute Care Version (PAQS-ACV)      | 1989           | Peer/Corollary Report    | No Subscales                                                                                                                                                                            | 45                    |                                                                                                                                                                                                |                                                                                                                                                       |
| Peace Attitude Scale (PAS)                                                 | 2021           | Self-Report              | (Sociopolitical) (Personal Well-Being) (Ease with Diversity) (Environmental Attitude) (Caring)                                                                                          | 22                    | "I never will host a foreign family in my house"<br>"If I bumped into an injured animal, I wouldn't hesitate to take care of it"                                                               | 7-point Likert-type scale (never, almost never, rarely, sometimes, often, very often, always)                                                         |
| Pediatric-Hematology Oncology Fellowship Training Skills Measure [Unnamed] | 2017           | Self-Report              | (balancing the competing demands of fellowships) (caring for the dying patient) (depression and burnout) (responding to challenging relationships with patients) (humanism in medicine) | 15                    | "When caring for a patient who is dying, I can show the care and compassion a family needs"<br>"Following a patient's death, I process my grief with great difficulty, coping poorly"          |                                                                                                                                                       |
| Peer Edmonton Empathy Recruitment Scale (PEERS)                            | 2018           | Self-Report              | No Subscales                                                                                                                                                                            | 18                    | "I am empathic"<br>"I am egotistical"                                                                                                                                                          | 10-point response scale (1 = strongly disagree to 10 = strongly agree)                                                                                |
| Peer Group Caring Interaction Scale (PGCIS)                                | 1998           | Peer/Corollary Report    | (caring behaviors) (giving assistance)                                                                                                                                                  | 16                    | "Anticipate, and are well aware of, the wishes of classmates"<br>"Talk freely to each other about their concerns and interests"                                                                |                                                                                                                                                       |
| Perceived Empathic and Social Self-Efficacy Scale (PESE)                   | 2010           | Self-Report              | (perceived empathic self-efficacy) (perceived social self-efficacy)                                                                                                                     | 11                    | "How well can you read your friends' needs"<br>"How well can you express your opinion to people who are talking about something of interest to you"                                            | five-point Likert-type scale (1 = not well at all to 5 = very well)                                                                                   |
| Perceived Empathy Measure                                                  | 1996           | Peer/Corollary Report    | No Subscales                                                                                                                                                                            | 8                     | "This salesperson seemed to feel what I needed when we talked about this purchase"<br>"This salesperson understands me as a person and my role in this organization."                          | a 5-point scale anchored by strongly agree (5) and strongly disagree (1)                                                                              |
| Performance of Empathic Expression Rating Scale (PEERS)                    | 2017           | Behavioural/Expert Coder | (verbal) (nonverbal) (global)                                                                                                                                                           | 11                    |                                                                                                                                                                                                |                                                                                                                                                       |
| Person-Centered Care Assessment Tool (P-CAT)                               | 2010           | Self-Report              | (Extent of Personalising Care) (Amount of Organisational Support) (Degree of Environmental Accountability)                                                                              | 13                    | "We have formal team meetings to discuss patients' care."<br>"I simply do not have the time to provide care based on the person's choice."                                                     | 5-point Likert scale (1 = strongly disagree to 5 = strongly agree)                                                                                    |
| Person-Centred Caring: Participation [Unnamed]                             | 2020           | Self-Report              | No Subscales                                                                                                                                                                            | 10                    | The people involved in my health care... "... gave me the information I needed to make decisions that were right for me"<br>"... respected my right to choose the care and treatment I wanted" | Never' = 0, 'Almost never' = 1, 'Sometimes' = 2, 'Almost always' = 3, 'Always' = 5                                                                    |
| Person-Centred Caring: Personalization [Unnamed]                           | 2020           | Self-Report              | (Connecting) (Knowing)                                                                                                                                                                  | 12                    | The people in my health care... "...showed an interest in me as a person"<br>"... took enough time to understand how my health affects me"                                                     | Never' = 0, 'Almost never' = 1, 'Sometimes' = 2, 'Almost always' = 3, 'Always' = 4                                                                    |
| Person-Centred Caring: Responsiveness [Unnamed]                            | 2020           | Self-Report              | (Being attentive) (Reciprocity)                                                                                                                                                         | 10                    | The people involved in my health care... "... knew which other healthcare staff were involved in my health care"<br>"... gave me their full attention when they were with me"                  | Never' = 0, 'Almost never' = 1, 'Sometimes' = 2, 'Almost always' = 3, 'Always' = 6                                                                    |
| Personal Orientation Inventory (POI)                                       | 1964           | Self-Report              | (self actualization) (belief in human benevolence) (modernity) (self consciousness) (empathy) (rigidity)                                                                                | 150                   | "I often get swept up in my friends' feelings"<br>"I don't become sad when I see other people crying"                                                                                          | 9-point scale                                                                                                                                         |
| Personal Strengths Inventory (PSI)                                         | 2007           | Self-Report              | (social competence) (emotional awareness) (goal setting) (emotional regulation) (empathy)                                                                                               | 22                    | "When I see someone being treated unfairly, I feel sympathy for them"<br>"I feel sorry for people when they are having problems"                                                               | 5-point scale, where 1 = very seldom true of me, 2 = seldom true of me, 3 = sometimes true of me, 4 = often true of me, and 5 = very often true of me |
| Personal Trust and Connections scale (PerTC)                               | 2022           | Self-Report              | (Emotional Reliance) (Social Reliance) (Cognitive Reliance)                                                                                                                             | 10                    | "Can you trust persons you have met for a few times?"<br>"Do you rapidly feel close to persons you trust?"                                                                                     | 10-point Likert-type scale (from 0: not at all, to 10: very much)                                                                                     |
| Personality Assessment Inventory-Borderline Features Scale (PAI-BOR)       | 1991           | Self-Report              | (Affective Instability) (Identity Problems) (Negative Relationships) (Self-Harm)                                                                                                        | 24                    |                                                                                                                                                                                                |                                                                                                                                                       |

| Instrument                                                                             | Published Year | Type of Measure          | Subscales/ Forms                                                                                                                                                                                                                                                                                                           | Total Number of Items | Sample Item(s)                                                                                                                                                                                                                                                | Response set                                                                                                                           |
|----------------------------------------------------------------------------------------|----------------|--------------------------|----------------------------------------------------------------------------------------------------------------------------------------------------------------------------------------------------------------------------------------------------------------------------------------------------------------------------|-----------------------|---------------------------------------------------------------------------------------------------------------------------------------------------------------------------------------------------------------------------------------------------------------|----------------------------------------------------------------------------------------------------------------------------------------|
| Personality Functioning Scale - Self Report (LPFS-SR)                                  | 2017           | Self-Report              | (identity) (self-direction) (intimacy) (empathy)                                                                                                                                                                                                                                                                           | 80                    | "I see myself as someone who is helpful and unselfish with others"<br>"I see myself as someone who can be cold and aloof"                                                                                                                                     | 5-point scale ranging from disagree strongly to agree strongly                                                                         |
| Perth Empathy Scale (PES)                                                              | 2023           | Self-Report              | (cognitive empathy) (positively valenced) (negatively valenced)                                                                                                                                                                                                                                                            | 20                    |                                                                                                                                                                                                                                                               | 5-point Likert scale, ranging from almost never (1) to almost always (5)                                                               |
| Pharmacists' Care of Migraineurs Scale (PCMS)                                          | 2008           | Self-Report              | (empathy) (prospective drug utilization review) (headache sufferer triage) (medication counseling) (nonpharmacologic treatment plan) (dissemination of public health information) (maintenance of knowledge on migraine)                                                                                                   | 45                    | "I listen attentively to patients describe frustrations regarding their headaches"<br>"I provide empathic responses to persons complaining of migraine or other recurring headaches"                                                                          | 1 = never to very rarely, 2 = rarely, 3 = sometimes, 4 = fairly often, and 5 = nearly all the time to all the time                     |
| Phenomenological Body Shame Scale - Revised (PBSS-R)                                   | 1998           | Self-Report              | No Subscales                                                                                                                                                                                                                                                                                                               | 8                     | For the next set of statements, imagine that you are looking at your body in a mirror, and indicate the degree to which you experience each of the feelings described, using the scale provided: "I feel like covering my body"<br>"I feel angry with myself" | 5-point scale ranging from 1 (not at all) to 5 (extremely)                                                                             |
| Physician 5-item Compassion Measure                                                    | 2019           | Peer/Corollary Report    | No Subscales                                                                                                                                                                                                                                                                                                               | 5                     | "During this hospital stay, how often do you feel your doctors cared about your emotional or psychological well-being?"<br>"During this hospital stay, how often do you feel your doctors were interested in you as a whole person?"                          | 1 = Never; 2 = Sometimes; 3 = Usually; 4 = Always                                                                                      |
| Physician-Caregiver Relationship Scales (PCRS)                                         | 2008           | Behavioural/Expert Coder | (physician-caregiver liking) (physician-caregiver understanding) (physician dominance)                                                                                                                                                                                                                                     | N/a                   |                                                                                                                                                                                                                                                               |                                                                                                                                        |
| Posttraumatic Growth Inventory (PTGI)                                                  | 1996           | Self-Report              | (compassion) (new possibilities) (relating to others) (personal strength) (appreciation of life and spiritual change)                                                                                                                                                                                                      | 8                     | "I feel compassion for other people who are facing challenges"<br>"I try to encourage people when they feel low"                                                                                                                                              | six-point Likert scale from 0 (not at all) to 5 (very great degree)                                                                    |
| Pregnant Women with HIV Attitude Scale                                                 | 2010           | Self-Report              | (child care) (myths/negative stereotypes) (reproduction/contraceptive issues) (sympathy/transmission routes)                                                                                                                                                                                                               | 27                    | "Volunteer to have their babies tested"<br>"Sympathy blood transfusions vs. injection drug use"                                                                                                                                                               | 5-point Likert scale ranging from strongly agree to strongly disagree                                                                  |
| Prejudice Confrontation Styles (PCS) Scale                                             | 2021           | Self-Report              | (Educational) (Argumentative) (Help-seeking) (Empathy) (Humor)                                                                                                                                                                                                                                                             | 22                    | "I teach them the various ways discrimination is still prominent in our society"<br>"I let them know they have hurt me"                                                                                                                                       | 1 (not at all true of me) to 5 (very true of me)                                                                                       |
| Prejudice toward People with Borderline Personality Disorder (PPBD) Scale              | 2018           | Self-Report              | (Fear/Avoidance) (Malevolence) (Authoritarianism) (Unpredictability)                                                                                                                                                                                                                                                       | 28                    | "I am not scared of people with borderline personality disorder."<br>"People who have borderline personality disorder should be forced to have treatment"                                                                                                     | 9-point Likert-type scale, ranging from 1 (very strongly disagree) to 9 (very strongly agree)                                          |
| Prejudice toward People with Depression (PPD)                                          | 2018           | Self-Report              | (fear/avoidance) (unpredictability) (authoritarianism) (malevolence)                                                                                                                                                                                                                                                       | 28                    | "I would find it hard to talk to someone who has depression"<br>"I would be just as happy to invite a person with depression into my home as I would anyone else"                                                                                             | 9-point Likert-type scale, ranging from 1 (very strongly disagree) to 9 (very strongly agree)                                          |
| Prejudice toward People with Schizophrenia (PPS)                                       | 2018           | Self-Report              | (fear/avoidance) (unpredictability) (authoritarianism) (malevolence)                                                                                                                                                                                                                                                       | 28                    | "I would find it hard to talk to someone who has schizophrenia"<br>"I would be just as happy to invite a person with schizophrenia into my home as I would anyone else"                                                                                       | 9-point Likert-type scale, ranging from 1 (very strongly disagree) to 9 (very strongly agree)                                          |
| Princess Margaret Hospital Patient Satisfaction with Doctor Questionnaire (PMH/PSQ-MD) | 1999           | Self-Report              | (understanding the patient's situation) (can talk about personal things) (consider needs) (interest in patient) (assessment -look into problems) (treatment) (competence) (explain - give information) (patient role in communication) (patient understanding) (time issue) (respectful/caring) (social/family well-being) | 29                    | "The doctor did not seem to really consider my needs"<br>"I felt able to tell this doctor about very personal things"                                                                                                                                         | four-point Likert scale (strongly agree, agree, disagree, and strongly disagree) as well as "does not apply" and "statement not clear" |
| Professional Quality of Life - Revised (ProQOL-21)                                     | 2010           | Self-Report              | (Compassion Satisfaction) (Compassion fatigue)                                                                                                                                                                                                                                                                             | 21                    | NA                                                                                                                                                                                                                                                            | three-to-five point Likert scales, depending on the item                                                                               |
| Professional Quality of Life Scale - Version 5 (ProQoL 5)                              | 2010           | Self-Report              | (compassion satisfaction) (secondary traumatic stress) (burnout)                                                                                                                                                                                                                                                           | 30                    | "Over the past six months, my work made me feel enthusiastic"<br>"Over the past six months, my work made me feel content"                                                                                                                                     | 5-point Likert scale ranging from 1 (never) to 5 (almost always)                                                                       |
| Professional Quality of Life Scale (ProQoL)                                            | 2010           | Self-Report              | (risk for burnout) (compassion satisfaction) (secondary traumatic stress)                                                                                                                                                                                                                                                  | 30                    | "Over the past six months, my work made me feel enthusiastic"<br>"Over the past six months, my work made me feel content"                                                                                                                                     | 5-point Likert scale ranging from 1 (never) to 5 (almost always)                                                                       |

| Instrument                                                                             | Published Year | Type of Measure          | Subscales/ Forms                                                                                                                                                                                                                                                | Total Number of Items | Sample Item(s)                                                                                                                                                                                                                                                                                                                                                                 | Response set                                                                                                                 |
|----------------------------------------------------------------------------------------|----------------|--------------------------|-----------------------------------------------------------------------------------------------------------------------------------------------------------------------------------------------------------------------------------------------------------------|-----------------------|--------------------------------------------------------------------------------------------------------------------------------------------------------------------------------------------------------------------------------------------------------------------------------------------------------------------------------------------------------------------------------|------------------------------------------------------------------------------------------------------------------------------|
| Professionalism Assessment Scale (PAS)                                                 | 2013           | Self-Report              | (professional relationship and development) (responsibility) (empathy and humanism)                                                                                                                                                                             | 22                    | "Physician should do his/her best to help the patient in every consultation"<br>"Physicians should adapt to the level of the patient's understanding"                                                                                                                                                                                                                          | 5-point Likert scale ranging from strongly agree to strongly disagree                                                        |
| Prosocial and Antisocial Behavior in Sport Scale (PABSS)                               | 2009           | Self-Report              | (prosocial - toward opponents) (prosocial - toward teammates) (antisocial - toward opponents) (antisocial - toward teammates)                                                                                                                                   | 20                    | "Helped an injured opponent"<br>"Deliberately fouled an opponent"                                                                                                                                                                                                                                                                                                              | 5-point Likert scale ranging from never to very often                                                                        |
| Prosocial Personality Battery (PSP)                                                    | 1995           | Self-Report              | (autonomy oriented helping) (dependency oriented helping) (opposition to helping)                                                                                                                                                                               | 24                    | "I like to try to help people even if the issue might come up again"<br>"Teaching people to take care of themselves is good for society because it makes them independent"                                                                                                                                                                                                     | 1 (strongly disagree) to 7 (strongly agree) scale                                                                            |
| Prosocial Risk-Taking Scale (PSRT)                                                     | 2021           | Self-Report              | No Subscales                                                                                                                                                                                                                                                    | 6                     | "You and your classmates are getting into groups for a project. An unpopular student asks you to work with her. You say yes, even though you risk your classmates judging you as uncool too."<br>"You notice some popular kids from school picking on another kid. You decide to step in and help the kid, even though you risk looking uncool or getting picked on yourself." | 5-point Likert-type scale ranging from "1 = Very unlikely" to "5 = Very likely"                                              |
| Psychopathic Personality Inventory - Short Form (PPI-SF)                               | 1990           | Self-Report              | (Machiavellian Egocentricity) (Social Potency) (Coldheartedness) (Fearlessness) (Impulsive Nonconformity) (Blame Externalization) (Carefree Nonplanfulness) (Stress Immunity)                                                                                   | 56                    | "I become deeply attached to people I like," Reversed                                                                                                                                                                                                                                                                                                                          | four-point Likert-type scale                                                                                                 |
| Psychosocial Costs of Racism to Whites Scale (PCRW)                                    | 2004           | Self-Report              | (white empathic reactions toward racism) (white guilt) (white fear of others)                                                                                                                                                                                   | 16                    | "I am angry that racism exists"<br>"I become sad when I think about racial injustice"                                                                                                                                                                                                                                                                                          | 6 point Likert-type scale from 1 (strongly disagree) to 6 (strongly agree)                                                   |
| Psychosocial Inventory of Ego Strengths (PIES)                                         | 1964           | Self-Report              | (hope) (will) (fidelity) (love) (care) (purpose) (competence) (wisdom)                                                                                                                                                                                          | 128                   |                                                                                                                                                                                                                                                                                                                                                                                |                                                                                                                              |
| Public Attitudes Towards Homelessness (PATH)                                           | 1988           | Self-Report              | (homeless) (poverty) (achieving tendency) (just world) (authoritarianism) (need for approval)                                                                                                                                                                   | 38                    | "Society is responsible for people being homeless"<br>"Many homeless people have themselves to blame"                                                                                                                                                                                                                                                                          | 4 point Likert-type scale from 1 (strongly disagree) to 4 (strongly agree)                                                   |
| Quality of Interactions Schedule (QuIS)                                                | 1993           | Behavioural/Expert Coder | No Subscales                                                                                                                                                                                                                                                    | N/A                   |                                                                                                                                                                                                                                                                                                                                                                                | five-category scale: positive social, positive care, neutral, negative protective, negative restrictive                      |
| Questionnaire Measure of Empathic Tendency                                             | 1972           | Self-Report              | (susceptibility to emotional contagion) (appreciation of the feelings of unfamiliar and distant others) (extreme emotional responsiveness) (tendency to be moved by others) (sympathetic tendency) (willingness to be in contact with others who have problems) | 33                    | "It makes me sad to see a lonely stranger in a group."<br>"The people around me have a great influence on my mood."                                                                                                                                                                                                                                                            | 8-point Likert-type scale ranging from -4 (very strong disagreement) to 4 (very strong agreement)                            |
| Questionnaire of Cognitive and Affective Empathy (QCAE)                                | 2010           | Self-Report              | (perspective taking) (online simulation) (emotion contagion) (proximal responsivity) (peripheral responsivity)                                                                                                                                                  | 31                    | "It is hard for me to see why some things upset people so much"<br>"I find it easy to put myself in somebody else's shoes"                                                                                                                                                                                                                                                     | 4 point Likert-type scale from 1 (strongly disagree) to 4 (strongly agree)                                                   |
| Range and Differentiation of Emotional Experience Scale (RDEES)                        | 2004           | Self-Report              | (range) (differentiation)                                                                                                                                                                                                                                       | 14                    | "I tend to experience a broad range of different feelings"<br>"I am aware of the different nuances or subtleties of a given emotion"                                                                                                                                                                                                                                           | 5-point scale, with 1 indicating that it "does not describe me very well" and 5 indicating that it "describes me very well." |
| Rating Scales for the Assessment of Empathic Communication in Medical Interviews (REM) | 2007           | Self-Report              | (empathic communication) (confrontation)                                                                                                                                                                                                                        | 9                     | "Did the physician provide the opportunity for the patient to give his/her opinion?"<br>"Did the physician treat the patient as an equal partner?"                                                                                                                                                                                                                             | 7-point Likert scale                                                                                                         |
| Reading the Mind in the Eyes Test (RMET)                                               | 1997           | Self-Report              | No Subscales                                                                                                                                                                                                                                                    | 36                    | "I try to look at everybody's side of a disagreement before I make a decision"<br>"It is easy for me to understand why others become sad when something heartbreaking happens to them"                                                                                                                                                                                         | 5 point and 7 point Likert-type scales                                                                                       |
| Reflective Functioning Questionnaire                                                   | 2015           | Self-Report              | (certainty about mental states) (uncertainty about mental states)                                                                                                                                                                                               | 101                   | "I don't become sad when I see other people crying"<br>"My friend's emotions don't affect me much"                                                                                                                                                                                                                                                                             | 6-point Likert-type scale ranging from 1 (completely disagree) to 6 (complete agree)                                         |

| Instrument                                                           | Published Year | Type of Measure | Subscales/ Forms                                                                                                                                                                                                                                                                                                                                 | Total Number of Items | Sample Item(s)                                                                                                                                                                                                                                                                         | Response set                                                                                                    |
|----------------------------------------------------------------------|----------------|-----------------|--------------------------------------------------------------------------------------------------------------------------------------------------------------------------------------------------------------------------------------------------------------------------------------------------------------------------------------------------|-----------------------|----------------------------------------------------------------------------------------------------------------------------------------------------------------------------------------------------------------------------------------------------------------------------------------|-----------------------------------------------------------------------------------------------------------------|
| Relational Care Scale (RCS)                                          | 1998           | Self-Report     | No Subscales                                                                                                                                                                                                                                                                                                                                     | 6                     | "The care aide takes your likes and dislikes into account when he or she is providing care."<br>"The care aide tries to meet your needs, for example, in such ways as listening to you if you need someone to talk to and/or comforting you when something bad or unexpected happens." | Five possible choices: 5 = always, 4 = often, 3 = occasionally, 2 = seldom, and 1 = never                       |
| Relational Competence for Community-Dwelling Elderly                 | 1990           | Self-Report     | No Subscales                                                                                                                                                                                                                                                                                                                                     | 15                    |                                                                                                                                                                                                                                                                                        |                                                                                                                 |
| Relational Depth (RD) Inventory                                      | 2011           | Self-Report     | (respect) (empathy & connectedness) (invigorated/liberating) (transcendence) (scared/vulnerable) (other person empathic/respectful)                                                                                                                                                                                                              | 54                    | "My therapist and I understand each other"<br>"I feel my therapist cares about me even when I do things that he/she does not approve of"                                                                                                                                               | 5 point Likert-type scale                                                                                       |
| Relational Engagement of the Sacred for a Transgression (REST) Scale | 2010           | Self-Report     | No Subscales                                                                                                                                                                                                                                                                                                                                     | 4                     | "Concerned"<br>"Compassionate"                                                                                                                                                                                                                                                         | 6-point Likert-type scale ranging from 0 (not at all) to 5 (extremely)                                          |
| Relationship Inventory (RI)                                          | 1962           | Self-Report     | (empathy) (congruence) (regard)                                                                                                                                                                                                                                                                                                                  | 69                    | "He/she usually understands all of what I say to her/him"<br>"He/she understands my words but not the way I feel"                                                                                                                                                                      |                                                                                                                 |
| Response Empathy Rating Scale                                        | 1982           | Self-Report     | (frame) (inference) (accuracy) (here & now) (centrality) (words) (voice) (manner) (impact)                                                                                                                                                                                                                                                       | 9                     | "Does the counselor try to perceive the world as it appears to the client"<br>"Is the counselor's voice expressive or empathic and appropriate to what the client is expressing"                                                                                                       | yes, definitely, perhaps, not sure, no, definitely                                                              |
| Restorative Justice Attitudes Scale (RJAS)                           | 2021           | Self-Report     | (Empathic Understanding) (Harm and Needs) (Restoration Processes) (Accountability) (Community Engagement)                                                                                                                                                                                                                                        | 20                    | "It is important to empathize with individuals who have caused harm to others"<br>"It is important to show empathy toward offenders of wrongdoing"                                                                                                                                     | 5-point Likert-type scale, ranging from 1 (strongly disagree) to 5 (Strongly agree)                             |
| Revised Humane Caring Scale (RHCS)                                   | 1998           | Self-Report     | (relationships) (privacy) (communication) (respect) (promoting physical health) (conditions for humane caring during hospitalization)                                                                                                                                                                                                            | 46                    | "My fears are alleviated"<br>"I was able to ask questions concerning my care"                                                                                                                                                                                                          | 5-point Likert-type scale ranging from 1 (totally disagree) to 5 (totally agree)                                |
| Revised Sense of Purpose Scale (SOPS-2)                              | 2018           | Self-Report     | (Awareness of purpose) (Altruistic purpose) (Awakening to purpose)                                                                                                                                                                                                                                                                               | 14                    | "My purpose in life is clear"<br>"I have a good understanding of my life's purpose"                                                                                                                                                                                                    | 1 = strongly disagree to 7 = strongly agree                                                                     |
| Safety Skills Questionnaire [Unnamed]                                | 2014           | Self-Report     | (honesty) (conscientiousness) (technical skills) (crisis management) (awareness of situation) (vigilance) (anticipation/preparedness) (awareness of self) (responsiveness) (common sense) (awareness of team) (organizational skills and efficiency) (confidence) (humility) (teamworking and communication) (awareness of patient) (leadership) | 66                    |                                                                                                                                                                                                                                                                                        |                                                                                                                 |
| San Diego Wisdom Scale (SD-WISE-7)                                   | 2019           | Self-Report     | (Decisiveness) (Emotional regulation) (Self-reflection) (Pro-social behaviors) (Social advising) (Acceptance of divergent perspectives)                                                                                                                                                                                                          | 7                     | "I remain calm under pressure"<br>"I avoid self-reflection"                                                                                                                                                                                                                            | The items are rated from 1 or "strongly disagree" to 5 or "strongly agree"                                      |
| San Diego Wisdom Scale (SD-WISE)                                     | 2017           | Self-Report     | No Subscales                                                                                                                                                                                                                                                                                                                                     | 24                    | "I am good at perceiving how others are feeling."<br>"I have trouble making decisions."                                                                                                                                                                                                | Strongly disagree to "Strongly agree"                                                                           |
| Santa Clara Brief Compassion Scale (SCBCS)                           | 2005           | Self-Report     | No Subscales                                                                                                                                                                                                                                                                                                                                     | 5                     | "I tend to feel compassion for people, even though I do not know them"<br>"When I hear about someone (a stranger) going through a difficult time, I feel a great deal of compassion for him/her"                                                                                       | 7-point scale from 1 being "not at all true of me" to 7 being "very true of me."                                |
| Santa Clara Ethics Questionnaire (SCES)                              | 2019           | Self-Report     | No Subscales                                                                                                                                                                                                                                                                                                                                     | 10                    | "I tend to feel compassion for people, even though I do not know them"<br>"When I hear about someone (a stranger) going through a difficult time, I feel a great deal of compassion for him/her"                                                                                       | 7-point scale from 1 being "not at all true of me" to 7 being "very true of me."                                |
| Satisfaction with Simulation Experience Scale (SSES)                 | 2011           | Self-Report     | (becoming culturally competent) (learning from the debrief) (reflecting on practice)                                                                                                                                                                                                                                                             | 18                    | "I believe the debrief has helped me be more understanding of the needs of culturally and linguistically diverse patients"<br>"The facilitator made me feel comfortable and at ease during the debrief"                                                                                | 5-point Likert scale ranging from strongly agree to strongly disagree                                           |
| Scale of Ethnocultural Empathy (SEE)                                 | 1983           | Self-Report     | (empathetic feeling and expression) (empathetic perspective taking) (acceptance of cultural differences) (empathetic awareness)                                                                                                                                                                                                                  | 62                    | "When other people struggle with racial or ethnic oppression, I share their frustration"<br>"I know what it feels like to be the only person of a certain race or ethnicity in a group of people"                                                                                      | 6-point Likert scale from 1 (strongly disagree that it describes me) to 6 (strongly agree that it describes me) |
| Scale of Humanistic Nursing Behaviors                                | 1987           | Self-Report     | (shared decision making) (holistic selves) (status equality) (empathy)                                                                                                                                                                                                                                                                           | 70                    | Staff include the patient in decisions concerning his or her care                                                                                                                                                                                                                      | 5 point Likert scale that describes the frequency of occurrence from 1 to 5                                     |

| Instrument                                                                                             | Published Year | Type of Measure          | Subscales/ Forms                                                                                                                                                         | Total Number of Items | Sample Item(s)                                                                                                                                                                                                                                                                                                   | Response set                                                                                                             |
|--------------------------------------------------------------------------------------------------------|----------------|--------------------------|--------------------------------------------------------------------------------------------------------------------------------------------------------------------------|-----------------------|------------------------------------------------------------------------------------------------------------------------------------------------------------------------------------------------------------------------------------------------------------------------------------------------------------------|--------------------------------------------------------------------------------------------------------------------------|
| Scale of Teacher Empathy for African American Males (S-TEAAM)                                          | 2012           | Self-Report              | (teacher conceptions of empathy with black male students) (teacher application of empathy with black male students)                                                      | 9                     | "I personally consider empathy to be a necessary disposition for teachers of Black students"<br>"I personally consider empathy to be a necessary disposition for teachers of Black male students"                                                                                                                | 4 point scale from strongly disagree to strongly agree                                                                   |
| Schadenfreude Scale                                                                                    | 2012           | Self-Report              | No Subscales                                                                                                                                                             | 12                    | "I take pleasure in another's failure"<br>"I think it's funny when I see a person make a fool of himself or herself"                                                                                                                                                                                             | response scale from 1 (strongly disagree) to 9 (strongly agree)                                                          |
| Schema of Partner Empathic Responses to Anger (SOPERA)                                                 | 1998           | Self-Report              | (consensus) (satisfaction) (cohesion) (affectional expression)                                                                                                           | 20                    |                                                                                                                                                                                                                                                                                                                  |                                                                                                                          |
| School Support Scale                                                                                   | 2006           | Self-Report              | (emotional support) (tangible support)                                                                                                                                   | 22                    | "I am encouraged to do my best"<br>"I believe I am cared about at school"                                                                                                                                                                                                                                        | 7-point Likert scale format (1 =Never, 2 = Rarely, 3 = A Little, 4 = Sometimes, 5 = Regularly,6 = Often, and 7 = Always) |
| Schwartz Center Compassionate Care Scale (SCCCS)                                                       | 1998           | Peer/Corollary Report    | No Subscales                                                                                                                                                             | 12                    | "Showing care and compassion"<br>"Express sensitivity, caring, and compassion for your situation"                                                                                                                                                                                                                | 5-points Likert scales ranging from "Poor" to "Excellent"                                                                |
| Screening Tool for Care Coordinator Assistants                                                         | 2014           | Peer/Corollary Report    | (developing two relationships) (maintaining equanimity) (empathic response) (individual and caregiver education) (critical reasoning) (perceptions of an elderly person) | 15                    |                                                                                                                                                                                                                                                                                                                  |                                                                                                                          |
| Screening, Brief Intervention and Referral to Treatment Checklist for Observation in Real-time (SCORE) | 2015           | Behavioural/Expert Coder | (feedback) (responsibility) (advice) (menu of options) (empathy) (self-efficacy)                                                                                         | 59                    | "Established rapport and introduces the session"<br>"Asks questions as written"                                                                                                                                                                                                                                  | Yes, No, Don't Know, Not Applicable                                                                                      |
| Secondary Traumatic Stress Scale (STSS)                                                                | 2004           | Self-Report              | (Intrusion) (Avoidance) (Arousal)                                                                                                                                        | 17                    | "My heart started pounding when I thought about my work with patients."<br>"It seemed as if I was reliving the trauma(s) experienced by my patient(s)."                                                                                                                                                          | five-point Likert scale ranging from "Never" to "Very Often"                                                             |
| Security of "I" Assessment (SofIA)                                                                     | 2016           | Peer/Corollary Report    | (emotions) (personality) (rumination) (worry)                                                                                                                            | 13                    |                                                                                                                                                                                                                                                                                                                  |                                                                                                                          |
| Self and Interpersonal Functioning Scale (SIFS)                                                        | 1980           | Self-Report              | (identity) (self-direction) (empathy) (intimacy)                                                                                                                         | 24                    | "I often have tender, concerned feeling for people less fortunate than me"<br>"When I see someone being taken advantage of, I feel kind of protective toward them"                                                                                                                                               | 7 point Likert scale                                                                                                     |
| Self Dyadic Perspective-Taking Scale (SDPT)                                                            | 1990           | Self-Report              | (strategies) (cognizance)                                                                                                                                                | 23                    | "In my relationship with my partner I believe that there are two sides to every question, and I try to look and think about both sides."<br>"When involved in an argument with me, my partner is the type of person who will consider and take into account my point of view and compare that with his/her own." | 5-point Likert-type scale ranging from 0 (totally disagree) to 4 (totally agree)                                         |
| Self versus Other Interest Implicit Association Test (SOI-IAT)                                         | 2020           | Self-Report              | (altruistic personality scale) (prosocial personality battery) (interpersonal reactivity index) (hypothetical dictator game)                                             | 40                    | "I try to look at everybody's side of a disagreement before I make a decision"<br>"I am quite touched by things that I see happen"                                                                                                                                                                               | 5 point and 7 point Likert-type scales                                                                                   |
| Self-Care Counseling Rubric (SCCR)                                                                     | 2013           | Peer/Corollary Report    | (attitude and attentiveness) (current complaint assessment) (treatment suggestions) (medication overview) (closure and teach-back)                                       | 14                    | "No empathy or made insincere statements of empathy, encouragement, and concern. Did not state the intention to help. No relationship with the patient."<br>"Little or no eye contact. Constant nervous movement. Did not maintain an appropriate distance from the patient."                                    | Four-point, Likert-type scale: 1 = unsatisfactory, 2 = needs development, 3 = satisfactory, and 4 = commendable.         |
| Self-Compassion and Self-Criticism Scales (SCCS)                                                       | 2015           | Self-Report              | (self-compassion) (self-criticism)                                                                                                                                       | 5                     | "I try to see my failing as part of the human condition"<br>"When I am going through a very hard time, I give myself the caring and tenderness I need"                                                                                                                                                           | 5-point Likert Scale of frequency (1 = almost never; 5 = almost always)                                                  |
| Self-Compassion Scale - Short Form (SCS-SF)                                                            | 2003           | Self-Report              | (Self-kindness) (Self-judgement) (Common humanity) (Isolation) (Mindfulness) (Over-identification)                                                                       | 12                    | "How empathetic is this child?"<br>"Shows concern for others."                                                                                                                                                                                                                                                   | 5-point Likert-scale response format (1 = 'Almost Never' to 5 = 'Almost Always')                                         |
| Self-Compassion Scale - Youth Version (SCS-Y)                                                          | 2003           | Self-Report              | (self-kindness) (mindfulness) (common humanity) (self-judgment) (isolation) (over-identification)                                                                        | 36                    | "When I fail at something important to me, I become consumed by feelings of inadequacy."<br>"I try to see my failing as part of the human condition."                                                                                                                                                            | 5-point Likert-type scale ranging from 1 (almost never) to 5 (almost always)                                             |
| Self-Compassion Scale (SCS)                                                                            | 2003           | Self-Report              | (self-kindness) (self-judgment) (common humanity) (isolation) (mindfulness) (over-identification)                                                                        | N/a                   | "When I fail at something important to me, I become consumed by feelings of inadequacy."<br>"I try to see my failing as part of the human condition."                                                                                                                                                            | 5-point Likert-type scale ranging from 1 (almost never) to 5 (almost always)                                             |
| Self-Connection Scale (SCS)                                                                            | 2021           | Self-Report              | (awareness) (acceptance) (alignment)                                                                                                                                     | 12                    | "I have a deep understanding of myself"<br>"It is easy for me to identify and understand how I am feeling in any given moment"                                                                                                                                                                                   | seven-point scale (1= strongly disagree; 7=strongly agree)                                                               |

| Instrument                                                             | Published Year | Type of Measure       | Subscales/ Forms                                                                                                                                                                                                                           | Total Number of Items | Sample Item(s)                                                                                                                                                                                               | Response set                                                                                              |
|------------------------------------------------------------------------|----------------|-----------------------|--------------------------------------------------------------------------------------------------------------------------------------------------------------------------------------------------------------------------------------------|-----------------------|--------------------------------------------------------------------------------------------------------------------------------------------------------------------------------------------------------------|-----------------------------------------------------------------------------------------------------------|
| Self-Efficacy for Mindfulness Meditation Practice Scale                | 1989           | Self-Report           | (attention) (compassion) (emotion)                                                                                                                                                                                                         | 9                     | "I am able to maintain compassion toward myself"<br>"I am able to be compassionate with myself when my mind wanders"                                                                                         | 9-point response scale that went from never (1), rarely (3), sometimes (5), usually (7), always (9)       |
| Self-focused Practice Questionnaire (SFPQ)                             | 2015           | Self-Report           | (the therapist-self) (the personal-self)                                                                                                                                                                                                   | 30                    | "Right now, my understanding of the reasons for patients' emotions and behaviors in therapy is better than it was"<br>"SPSR/SFP/PT made me a better therapist when working with clients"                     | 4-point Likert scale: 0 (do not agree), 1 (slightly agree), 2 (definitely agree) and 3 (strongly agree)   |
| Self-Other Four Immeasurables Scale (SOFI)                             | 2009           | Self-Report           | (positive qualities toward self)<br>(positive qualities toward others)<br>(negative qualities toward self)<br>(negative qualities toward others)                                                                                           | 8                     | "Indicate to what extent you have thought, felt, or acted this way toward yourself and others during the past WEEK:<br>Friendly—toward myself"<br>Friendly—toward others"                                    | 5-point Likert-type scale ranging from 1 (very slightly or not at all) to 5 (extremely)                   |
| Semi-Structured Interview for Personality Functioning DSM-5 (STIP-5.1) | 2013           | Self-Report           | No Subscales                                                                                                                                                                                                                               | 28                    |                                                                                                                                                                                                              |                                                                                                           |
| SERVPERF-R                                                             | 1988           | Peer/Corollary Report | (tangibles) (reliability)<br>(responsiveness) (assurance)<br>(empathy)                                                                                                                                                                     | 15                    | "They have my best interests at heart"<br>"Receiving personal attention"                                                                                                                                     | 7-point Likert scale(1 =strongly disagree, 7 = strongly agree)                                            |
| SERVQUAL (SERVice QUALity)                                             | 1988           | Peer/Corollary Report | (empathy) (relationship of mutual respect) (dignity) (understanding of illness) (religious needs) (food and physical environment)                                                                                                          | 15                    | "They have my best interests at heart"<br>"Receiving personal attention"                                                                                                                                     | 7-point Likert scale(1 =strongly disagree, 7 = strongly agree)                                            |
| Severity Indices of Personality Problems-Short Form (SIPP-SF)          | 2008           | Self-Report           | (Self-Control) (Identity Integration)<br>(Social Concordance) (Responsibility)<br>(Relational Capacities)                                                                                                                                  | 60                    |                                                                                                                                                                                                              |                                                                                                           |
| Sex Trafficking Attitudes Scale (STAS)                                 | 2016           | Self-Report           | (attitudes toward ability to leave sex trafficking) (efficacy to reduce sex trafficking) (knowledge about sex trafficking) (empathic reactions toward sex trafficking) (attitudes toward helping survivors) (awareness of sex trafficking) | 27                    | "I become emotional thinking about trafficking"<br>"I can make a difference for trafficked persons"                                                                                                          | Likert-type scale ranging from 1 (strongly disagree) to 6 (strongly agree)                                |
| Sexual Narcissism Scale                                                | 2010           | Self-Report           | (sexual exploitation) (sexual entitlement) (low sexual empathy,and sexual skill)                                                                                                                                                           | 20                    | "The feelings of my sexual partners don't usually concern me"<br>"When I sleep with someone, I rarely know what they are thinking or feeling"                                                                | 5-point scale (1 = Strongly Disagree to 5 = Strongly Agree)                                               |
| Shared Care Instrument (SCI)                                           | 2005           | Self-Report           | (communication) (decision making)<br>(reciprocity) (balance)                                                                                                                                                                               | 26                    | "When my family member is not feeling well, s/he decides when to call the doctor."<br>"I sacrifice my own needs."                                                                                            | a 6-point Likert-type scale ranging from strongly disagree (1) to strongly agree (6)                      |
| Shared Care Instrument-Revised (SCI-R)                                 | 2005           | Self-Report           | (communication) (decision making)<br>(reciprocity)                                                                                                                                                                                         | 19                    | "When my family member is not feeling well, s/he decides when to call the doctor."<br>"I sacrifice my own needs."                                                                                            | a 6-point Likert-type scale ranging fromstrongly disagree (1) to strongly agree (6)                       |
| Short-Form Five Facet Mindfulness Questionnaire (FFMQ-SF)              | 2013           | Self-Report           | (describing experience with language)<br>(observe) (acting with awareness)<br>(nonjudgment of experience)<br>(nonreactivity to inner experience)                                                                                           | 20                    | "I criticize myself for having irrational or inappropriate emotions."<br>"When I have distressing thoughts or images, I feel calm soon after."                                                               | 5-point Likert-type scale ranging from 1 (never or very rarely true) to 5 (very often or always true)     |
| Sinclair Compassion Questionnaire (SCQ)                                | 2021           | Peer/Corollary Report | No Subscales                                                                                                                                                                                                                               | 15                    | Condensed:<br>"Feel cared for"<br>"Genuine concern"                                                                                                                                                          | 5-point Likert scale of agreement (1=strongly disagree, 2=disagree, 3=neutral, 4=agree, 5=strongly agree) |
| Single Item Trait Empathy Scale (SITES)                                | 2018           | Self-Report           | No Subscales                                                                                                                                                                                                                               | 1                     | "When I see someone being taken advantage of, I feel kind of protective towards them"<br>"When I see someone who badly needs help in an emergency, I go to pieces"                                           | 5-point Likert scale ranging from "Does not describe me well" to "Describes me very well".                |
| Single-Item Measure of Depersonalization                               | 2009           | Self-Report           | No Subscales                                                                                                                                                                                                                               | 1                     | "I have become more callous toward people since I took this job"                                                                                                                                             | 7-point Likert scale with response options ranging from "Never" to "Daily"                                |
| Single-Item Measure of Emotional Exhaustion                            | 2009           | Self-Report           | No Subscales                                                                                                                                                                                                                               | 1                     | "I feel burned out from my work"                                                                                                                                                                             | 7-point Likert scale with response options ranging from "Never" to "Daily"                                |
| Single-Item Mindfulness Scale (SIMS)                                   | 2022           | Self-Report           | No Subscales                                                                                                                                                                                                                               | 1                     | To what extent do you agree with this statement: "I am a mindful person." (Note: a mindfulperson pays attention to the present, is less concerned about the past or future, and accepts things as they are). | 1= not at all, 4 = moderately agree, 7 = strongly agree                                                   |
| Single-Item Self-Compassion Scale (SISC)                               | 2022           | Self-Report           | No Subscales                                                                                                                                                                                                                               | 1                     | I have high self-compassion                                                                                                                                                                                  |                                                                                                           |
| Situational Judgment Tests (SJTs)                                      | 2014           | Self-Report           | No Subscales                                                                                                                                                                                                                               | 40                    |                                                                                                                                                                                                              |                                                                                                           |
| Social Anhedonia Scale (SAS)                                           | 1976           | Self-Report           | No Subscales                                                                                                                                                                                                                               | 40                    | "I have warm relationships with some people"<br>"I feel family decisions need to be made jointly"                                                                                                            | 3-point scale ranging from strongly like you (1) to essentially unlike you (3)                            |



| Instrument                                                                       | Published Year | Type of Measure          | Subscales/ Forms                                                                                                                                                                                                                                    | Total Number of Items | Sample Item(s)                                                                                                                                                                                                                                                                                                                                                                                             | Response set                                                                                                                                                                     |
|----------------------------------------------------------------------------------|----------------|--------------------------|-----------------------------------------------------------------------------------------------------------------------------------------------------------------------------------------------------------------------------------------------------|-----------------------|------------------------------------------------------------------------------------------------------------------------------------------------------------------------------------------------------------------------------------------------------------------------------------------------------------------------------------------------------------------------------------------------------------|----------------------------------------------------------------------------------------------------------------------------------------------------------------------------------|
| Social Cognition and Functioning (SCAF)                                          | 2013           | Behavioural/Expert Coder | (basic biological motion) (emotion in biological motion) (self-referential memory) (empathetic accuracy) (facial affect identification)                                                                                                             | N/a                   |                                                                                                                                                                                                                                                                                                                                                                                                            |                                                                                                                                                                                  |
| Social Competence Interview                                                      | 1991           | Peer/Corollary Report    | (interpersonal skills) (goal-oriented strivings in coping social impact)                                                                                                                                                                            | 36                    |                                                                                                                                                                                                                                                                                                                                                                                                            |                                                                                                                                                                                  |
| Social Emotional Health Survey Higher Education (SEHS-HE)                        | 2017           | Self-Report              | (self-efficacy) (persistence) (self-awareness) (belief-in-others) (family support) (institutional support) (peer support) (emotional competence) (cognitive reappraisal) (empathy) (self-regulation) (engaged living) (gratitude) (zest) (optimism) | 36                    | "I am aware of others' hardships"<br>"I feel badly when my friends are put down"                                                                                                                                                                                                                                                                                                                           | 6 point Likert-type scale from 1 (very much unlike me) to 6 (very much like me)                                                                                                  |
| Social Issues Advocacy Scale (SIAS)                                              | 2013           | Self-Report              | (political and social advocacy) (confronting discrimination) (political awareness) (social issue awareness)                                                                                                                                         | 21                    | "I participate in demonstrations or rallies about social issues that are important to me"<br>"I volunteer for political causes and candidates I believe in"                                                                                                                                                                                                                                                | Likert-type scale (1 = strongly disagree that it describes me; 6 = strongly agree that it describes me)                                                                          |
| Social Justice and Empathy Assessment (SJEA)                                     | 2021           | Self-Report              | (social justice) (Empathy) (CAPE Educational Outcomes)                                                                                                                                                                                              | 17                    | "I plan to stay abreast of current laws and policies affecting populations with which I work"<br>"I am aware that there are effects of oppression on clients/patients"                                                                                                                                                                                                                                     | six-point Likert scale ranging from strongly agree to strongly disagree and high competence to low competence                                                                    |
| Social Relations Survey (SRS)                                                    | 1990           | Self-Report              | (social assertiveness) (directiveness) (defense of rights) (confidence) (empathy)                                                                                                                                                                   | 128                   | "When a friend expresses anxiety over some problem, I too become troubled"<br>"I usually maintain a cool and detached feeling toward people"                                                                                                                                                                                                                                                               | 6 point Likert-type scale from very much (1), moderately (2), slightly (3), and slightly (4), moderately (5), and very much (6)                                                  |
| Social Self-Compassion Scale (SSCS)                                              | 2020           | Self-Report              | (self-criticism) (self-compassion)                                                                                                                                                                                                                  | 12                    | "When I'm having a hard time in social situations, I give myself the caring and tenderness I need"<br>"I'm intolerant and impatient towards myself when socially anxious"                                                                                                                                                                                                                                  |                                                                                                                                                                                  |
| Social Skills Improvement System Rating Scales Parent Form (SSIS)                | 2008           | Self-Report              | (empathy and prosocial skills) (engagement and relationship skills) (cooperation) (self-control)                                                                                                                                                    | 46                    | NA                                                                                                                                                                                                                                                                                                                                                                                                         | 4-point scale ("never," "seldom," "often," "almost always")                                                                                                                      |
| Social Skills Improvement System (SSIS)                                          | 2008           | Peer/Corollary Report    | (self-regulation/responsibility) (social competence) (empathy)                                                                                                                                                                                      | 39                    | "Accepts responsibility when he/she needs to."<br>"Makes friends easily."                                                                                                                                                                                                                                                                                                                                  | Four-point Likert-type scale                                                                                                                                                     |
| Social-Emotional Assets and Resilience Scale - Parent Form (SEARS-P)             | 2008           | Peer/Corollary Report    | (self-regulation/responsibility) (social competence) (empathy)                                                                                                                                                                                      | 39                    | "Accepts responsibility when he/she needs to."<br>"Makes friends easily."                                                                                                                                                                                                                                                                                                                                  | Four-point Likert-type scale                                                                                                                                                     |
| Social-Emotional Responding Task (SERT)                                          | 2017           | Self-Report              | (aggressive acts) (prosocial omission) (social exclusion)                                                                                                                                                                                           | 6                     | Imagine that you are at school. Another boy in your class, Mark, shows you a chocolate bar he brought from home. He then puts it back in his backpack. You really like chocolate. When Mark leaves, you wait until nobody is watching, and you take the chocolate bar from his backpack so you can eat it." Anticipated emotions were elicited by the question "How would you feel if you had done this?." |                                                                                                                                                                                  |
| Solidarity Scale                                                                 | 2016           | Peer/Corollary Report    | (altruism) (solidarity)                                                                                                                                                                                                                             | 22                    | "If violence against people of my race is done by police or other people in New York City, I should speak up"<br>"If violence against people of my race is done by police or other people in New York City, I should offer support to the victim or his/her family"                                                                                                                                        | 1: disagree strongly; 2: disagree somewhat; 3: neither disagree nor agree; 4: agree somewhat; 5: agree strongly (6: not applicable; 7: don't know; 8: refused to answer/missing) |
| Spatial Perspective Task (SPT)                                                   | 2008           | Self-Report              | No Subscales                                                                                                                                                                                                                                        | N/a                   | Reading the mind in the eyes task (RMET) - not questionnaire-based study                                                                                                                                                                                                                                                                                                                                   |                                                                                                                                                                                  |
| Spiritual Modeling Inventory of Life Environments (SMILE)                        | 2009           | Self-Report              | No Subscales                                                                                                                                                                                                                                        | 18                    |                                                                                                                                                                                                                                                                                                                                                                                                            |                                                                                                                                                                                  |
| Sports Injury Clinic Athlete Satisfaction Scale (SICASS)                         | 1995           | Self-Report              | (evaluation of empathy) (information given) (competence)                                                                                                                                                                                            | 16                    | "I felt free to talk to my physiologist about the things that were bothering me"<br>"The physiologists was very sensitive towards me needs as an active person"                                                                                                                                                                                                                                            | 5-point Likert-type scale ranging from 1 (strongly disagree) to 5 (strongly agree)                                                                                               |
| Staff Attitudes Towards Patients who Attempt Suicide [Unnamed]                   | 1998           | Self-Report              | (emotional attitudes) (empathic or rejecting) (attitudes toward further training) (attitudes toward the need for psychiatric care)                                                                                                                  | 100                   | "A patient who has tried to commit suicide usually takes up a great deal of staff time"<br>"Once people have made up their minds to commit suicide, you cannot stop them"                                                                                                                                                                                                                                  |                                                                                                                                                                                  |
| Staff-Patient Interaction Response Scale for Palliative Care Nursing (SPIRS-PCN) | 1990           | Behavioural/Expert Coder | No Subscales                                                                                                                                                                                                                                        | 10                    | "Frank is a patient in his mid-60s. He was admitted to hospital 4 days ago for chemotherapy for advanced prostate cancer."<br>"Anne is a patient in her mid-20s with a history of intravenous drug use who was admitted to hospital 2 days ago for a liver biopsy. She is positive for Hepatitis B and HIV."                                                                                               | Short written response                                                                                                                                                           |
| Standardized Assessment of Severity of Personality Disorder (SASPD)              | 2018           | Self-Report              | No Subscales                                                                                                                                                                                                                                        | 9                     |                                                                                                                                                                                                                                                                                                                                                                                                            |                                                                                                                                                                                  |

| Instrument                                                  | Published Year | Type of Measure          | Subscales/ Forms                                                                                                                                                                                                                                                                                                                     | Total Number of Items | Sample Item(s)                                                                                                                                                                                                                                                                                                                                                                                                                                                              | Response set                                                                                       |
|-------------------------------------------------------------|----------------|--------------------------|--------------------------------------------------------------------------------------------------------------------------------------------------------------------------------------------------------------------------------------------------------------------------------------------------------------------------------------|-----------------------|-----------------------------------------------------------------------------------------------------------------------------------------------------------------------------------------------------------------------------------------------------------------------------------------------------------------------------------------------------------------------------------------------------------------------------------------------------------------------------|----------------------------------------------------------------------------------------------------|
| State Empathy Scale [Unnamed]                               | 2010           | Self-Report              | (affective empathy) (cognitive empathy) (associative empathy)                                                                                                                                                                                                                                                                        | 12                    | "I experienced the same emotions as the character when watching this message"<br>"I can feel the character's emotions"                                                                                                                                                                                                                                                                                                                                                      | 5-point Likert scale anchored at both poles (0 = "not at all," and 4 = "completely")               |
| State Moral Elevation Scale (SMES)                          | 2022           | Self-Report              | No Subscales                                                                                                                                                                                                                                                                                                                         | 9                     | To what extent did you experience each of the following statements while [insert time/context specifier]: "Motivated to live in a nobler or virtuous way"<br>"Somehow 'lifted up' or in touch with the better parts of myself"                                                                                                                                                                                                                                              | Likert-type scale was used with ratings from 0 (not at all) to 4 (extremely)                       |
| State Self-Compassion Scale-Long (SSCS-L)                   | 2020           | Self-Report              | (Self-Kindness) (Common Humanity) (Mindfulness) (Self-Judgment) (Isolation) (Overidentification)                                                                                                                                                                                                                                     | 18                    | "I'm giving myself the caring and tenderness I need"<br>"I see my difficulties as part of life that everyone goes through"                                                                                                                                                                                                                                                                                                                                                  | 1 (not at all true for me) to 5 (very true for me)                                                 |
| State Self-Compassion Scale-Short Form (SSCS-S)             | 2020           | Self-Report              | (Self-Kindness) (Common Humanity) (Mindfulness) (Self-Judgment) (Isolation) (Overidentification)                                                                                                                                                                                                                                     | 6                     | "I'm giving myself the caring and tenderness I need"<br>"I'm remembering that there are lots of others in the world feeling like I am"                                                                                                                                                                                                                                                                                                                                      | 1 (not at all true for me) to 5 (very true for me)                                                 |
| State-Empathic Concern Scale                                | 2019           | Self-Report              | (perspective taking) (empathic concern) (fantasy) (personal distress)                                                                                                                                                                                                                                                                | 5                     | "I tend to lose control during emergencies"<br>"When I am reading an interesting story or novel, I imagine how I would feel if the events in the story were happening to me"                                                                                                                                                                                                                                                                                                | 5-point Likert-type scale ranging from 0 (does not describe me well) to 4 (describes me very well) |
| State-Interpersonal Reactivity Index (S-IRI)                | 1980           | Self-Report              | (State empathic concern) (State perspective taking) (State personal distress)                                                                                                                                                                                                                                                        | 14                    | "I had tender, concerned feelings for my client when he/she discussed his/her concerns."<br>"It was difficult to see things from my client's point of view."                                                                                                                                                                                                                                                                                                                |                                                                                                    |
| State-Trait Scales for Distinct Positive Emotions (STS-DPE) | 2020           | Self-Report              | (Admiration) (Awe) (Gratitude) (Sympathy) (Tenderness) (Empathy) (Interest) (Hope) (Enthusiasm) (Schadenfreude) (Amusement) (Contentment) (Nurturant Love) (Romantic Love) (Attachment Love)                                                                                                                                         | 101                   | To what extent does each of the following statements characterize your experience of [TARGET EMOTION ] "I felt admiration"<br>"I felt a desire to become more like a specific person"                                                                                                                                                                                                                                                                                       | Anchors: 1 = not at all, 3 = somewhat, 5 = very much                                               |
| Suicidal Patients Scale (USP Scale)                         | 1998           | Self-Report              | (emotional attitudes) (empathic or rejecting) (attitudes toward further training) (attitudes toward the need for psychiatric care)                                                                                                                                                                                                   | 100                   | "A patient who has tried to commit suicide usually takes up a great deal of staff time"<br>"Once people have made up their minds to commit suicide, you cannot stop them"                                                                                                                                                                                                                                                                                                   |                                                                                                    |
| Suicide Attitude Vignette Experience (SAVE) Scale           | 1984           | Self-Report              | (failure to achieve academically) (break-up of a relationship) (parental disapproval) (rejection because of physical appearance) (mental loss caused by use of drugs) (physical loss of the use of legs) (terminal illness associated with pain) (parental discord and divorce) (death of a parent) (guilt over causing an accident) | 10                    | "Carol has had leukemia since she was 13. She is now 17. She has known for over a year that the disease is most likely going to kill her. Lately the pain has increased to the point where the drugs no longer control it. Carol attempts suicide"<br>"Tom is an 18-year-old who was in an automobile accident last year. He had been a member of the football team and was very active in school activities. Now he is paralyzed from the waist down. He attempts suicide" | 5-point Likert-type scale to how much they sympathize, empathize, and agree with action            |
| Sulliman Scale of Social Interest (SSSI)                    | 1994           | Self-Report              | (social interest) (empathy) (interpersonal contact) (happiness) (narcissism) (fantasy and personal distress empathy)                                                                                                                                                                                                                 | 50                    | "He/she listens well in a conversation."<br>"He/she is cooperative with others."                                                                                                                                                                                                                                                                                                                                                                                            | True/False                                                                                         |
| Survey of Physician Humanistic Approaches to Patient Care   | 1993           | Peer/Corollary Report    | No Subscales                                                                                                                                                                                                                                                                                                                         | 5                     |                                                                                                                                                                                                                                                                                                                                                                                                                                                                             |                                                                                                    |
| Sussex-Oxford Compassion for Others Scale (SOCOS-O)         | 2020           | Self-Report              | (recognizing suffering) (understanding the universality of suffering) (feeling for the person suffering) (tolerating uncomfortable feelings) (motivation to act/acting to alleviate)                                                                                                                                                 | 20                    | "I notice when others are feeling distressed"<br>"I understand that everyone experiences suffering at some point in their lives."                                                                                                                                                                                                                                                                                                                                           | 5-point Likert-type scale ranging from 1 (not at all true) to 5 (always true)                      |
| Sussex-Oxford Compassion for the Self Scale (SOCOS-S)       | 2020           | Self-Report              | (recognizing suffering) (understanding the universality of suffering) (feeling for the person suffering) (tolerating uncomfortable feelings) (motivation to act/acting to alleviate)                                                                                                                                                 | 20                    | "I notice when others are feeling distressed"<br>"I understand that everyone experiences suffering at some point in their lives."                                                                                                                                                                                                                                                                                                                                           | 5-point Likert-type scale ranging from 1 (not at all true) to 5 (always true)                      |
| Systemizing Quotient - Child (SQ-C)                         | 2009           | Self-Report              | No Subscales                                                                                                                                                                                                                                                                                                                         | 28                    | "I find it hard to understand how to behave in a social situation"<br>"In a conversation, I tend to focus on my own thoughts rather than on what my listener might be thinking."                                                                                                                                                                                                                                                                                            | 5-point Likert-type scale ranging from 0 (strongly disagree) to 4 (strongly agree)                 |
| Tape Excerpt Response Procedure (TERPs)                     | 1972           | Behavioural/Expert Coder | No Subscales                                                                                                                                                                                                                                                                                                                         | 64                    |                                                                                                                                                                                                                                                                                                                                                                                                                                                                             |                                                                                                    |
| Taxonomy of Compassionate Physician Behaviours [Unnamed]    | 2011           | Behavioural/Expert Coder | (recognition of the patient's suffering) (emotional resonance and movement towards addressing suffering)                                                                                                                                                                                                                             | N/a                   |                                                                                                                                                                                                                                                                                                                                                                                                                                                                             |                                                                                                    |
| Test of Accurate Perception of Patients' Affect (TAPPA)     | 2014           | Self-Report              | No Subscales                                                                                                                                                                                                                                                                                                                         | 48                    | What was the patient thinking or feeling the moment the tape stopped?                                                                                                                                                                                                                                                                                                                                                                                                       | different answer choices specific to each question                                                 |

| Instrument                                                                 | Published Year | Type of Measure          | Subscales/ Forms                                                                                                                                                                                                                                                                                                                                                                                                                                                                                                                                                                                                                                                 | Total Number of Items | Sample Item(s)                                                                                                                                                                                                                                                                                | Response set                                                                                                                               |
|----------------------------------------------------------------------------|----------------|--------------------------|------------------------------------------------------------------------------------------------------------------------------------------------------------------------------------------------------------------------------------------------------------------------------------------------------------------------------------------------------------------------------------------------------------------------------------------------------------------------------------------------------------------------------------------------------------------------------------------------------------------------------------------------------------------|-----------------------|-----------------------------------------------------------------------------------------------------------------------------------------------------------------------------------------------------------------------------------------------------------------------------------------------|--------------------------------------------------------------------------------------------------------------------------------------------|
| Test of Self-Conscious Affect - Adolescent (TOSCA-A)                       | 1991           | Self-Report              | (guilt) (shame)                                                                                                                                                                                                                                                                                                                                                                                                                                                                                                                                                                                                                                                  | 64                    | "It makes me sad to see a girl who can't find anyone to play with"<br>"Seeing a boy who is crying makes me feel like crying"                                                                                                                                                                  | 4-point scale ranging from 1 = Strongly Disagree to 4 = Strongly Agree                                                                     |
| Therapeutic Environment Scales (TESS)                                      | 2014           | Self-Report              | (respondent's experience with staff) (experience with non-staff members) (other residents or patients) (processes that do not relate to interactions within the community)                                                                                                                                                                                                                                                                                                                                                                                                                                                                                       | 9                     |                                                                                                                                                                                                                                                                                               |                                                                                                                                            |
| Therapist Empathy Scale (TES)                                              | 2015           | Behavioural/Expert Coder | No Subscales                                                                                                                                                                                                                                                                                                                                                                                                                                                                                                                                                                                                                                                     | 9                     | A therapist conveys concern by showing a regard for and interest in the client. The therapist seems engaged and involved with the client and attentive to what the client has said. The therapist's voice has a soft resonance that supports and enhances the client's concerned expressions. | 7-point Likert-type scale (1 = not at all, to 7 = extensively)                                                                             |
| Therapists' Systemic Response Rating Scale [Unnamed]                       | 2000           | Behavioural/Expert Coder | (interactional sequences) (consideration of context)                                                                                                                                                                                                                                                                                                                                                                                                                                                                                                                                                                                                             | N/a                   |                                                                                                                                                                                                                                                                                               |                                                                                                                                            |
| Thought Impact Scale (TIS)                                                 | 2020           | Self-Report              | (physical sensations/reactions in response to thoughts or emotions) (spontaneous vivid imagery in response to specific thoughts or situations) (spontaneous influence on behavior by imagination/nonconscious thought content) (spontaneous superimposing of a sense of meaning on neutral or ambiguous external stimuli) (spontaneous emotional responses to imagery) (spontaneous useful memory modulation) (effortless completion of complex familiar tasks with no conscious attention) (narrowed awareness of or dissociation from here-and-now in response to compelling thoughts) (personally valuable knowledge emerging spontaneously in consciousness) | 39                    | "Other people's misfortunes do not disturb me a great deal"<br>"When someone else is feeling excited, I tend to get excited too"                                                                                                                                                              | 5 point response scale of never, rarely, sometimes, often, and always                                                                      |
| Tool to Assess Inpatient Satisfaction with Care from Hospitalists (TAISCH) | 2012           | Self-Report              | No Subscales                                                                                                                                                                                                                                                                                                                                                                                                                                                                                                                                                                                                                                                     | 17                    | "Compared to all other physicians that you know, how do you rate Dr. X's compassion, empathy, and concern for you"<br>"Dr. X showed interest in my views and opinions about my health"                                                                                                        | 5-point Likert scales                                                                                                                      |
| Toronto Empathy Questionnaire (TEQ)                                        | 2009           | Self-Report              | No Subscales                                                                                                                                                                                                                                                                                                                                                                                                                                                                                                                                                                                                                                                     | 16                    | "Other people's misfortunes do not disturb me a great deal"<br>"When someone else is feeling excited, I tend to get excited too"                                                                                                                                                              | 5-point Likert scale (i.e., never, rarely, sometimes, often, always)                                                                       |
| Trait Emotional Intelligence Questionnaire Short Form (TEIQue-SF)          | 2003           | Self-Report              | (self-confidence) (empathy) (uncertainty) (social connection)                                                                                                                                                                                                                                                                                                                                                                                                                                                                                                                                                                                                    | 30                    | "I'm normally able to "get into someone's shoes" and experience their emotions"<br>"I don't seem to have any power at all over other people's feelings"                                                                                                                                       | 7-point Likert scale ranging from 1 (completely disagree) to 7 (completely agree)                                                          |
| Trait Sympathy Scales (TSS)                                                | 2008           | Self-Report              | (sympathy for the disempowered) (sympathy for the feelings of others) (sympathy for others)                                                                                                                                                                                                                                                                                                                                                                                                                                                                                                                                                                      | 18                    | "It breaks my heart to hear about people with disabilities getting made fun of for their disabilities"<br>"To see an elderly person fall down and get hurt would really break my heart"                                                                                                       | 7-point scale ranging from 1 (strongly disagree) to 7 (strongly agree)                                                                     |
| Transactional Analysis Ego States                                          | 1980           | Self-Report              | (thrill and adventureseeking) (experience seeking) (disinhibition) (boredom susceptibility)                                                                                                                                                                                                                                                                                                                                                                                                                                                                                                                                                                      | 300                   |                                                                                                                                                                                                                                                                                               |                                                                                                                                            |
| Transpersonal Gratitude Scale                                              | 2014           | Self-Report              | (expression of gratitude) (value of gratitude) (transcendent gratitude) (spiritual connection)                                                                                                                                                                                                                                                                                                                                                                                                                                                                                                                                                                   | 16                    | "Thinking of the blessings that I've received helps me to appreciate life"<br>"I show appreciation to others when they have positively influenced my life."                                                                                                                                   | 6-point Likert scale ranging from 1 (strongly disagree) to 6 (strongly disagree)                                                           |
| Trauma-Informed Self-Care Measure                                          | 2008           | Self-Report              | (utilizing organisational resources) (organizational practices) (professional self-care)                                                                                                                                                                                                                                                                                                                                                                                                                                                                                                                                                                         | 10                    | "I would suggest mental health counseling for a coworker needing additional support!"<br>"I balance my caseloads so that I am not dealing only with traumatized children and their families"                                                                                                  | Likert response of not at all = 0; to a slight extent = 1; to a moderate extent = 2; to a great extent = 3; and to a very great extent = 4 |
| Trauma-Related Shame Inventory - Short Form (TRSI-SF)                      | 2022           | Self-Report              | (internal shame) (external shame)                                                                                                                                                                                                                                                                                                                                                                                                                                                                                                                                                                                                                                | 10                    | "I am ashamed of myself because of what happened to me."<br>"If others knew what happened to me, they would be disgusted with me"                                                                                                                                                             | 4-point scale (0 to 3) where higher scores indicate elevated levels of trauma-related shame                                                |

| Instrument                                                             | Published Year | Type of Measure          | Subscales/ Forms                                                                                                                                                                                                                     | Total Number of Items | Sample Item(s)                                                                                                                                                                                                                                                        | Response set                                                                                                                                                                                                                                                             |
|------------------------------------------------------------------------|----------------|--------------------------|--------------------------------------------------------------------------------------------------------------------------------------------------------------------------------------------------------------------------------------|-----------------------|-----------------------------------------------------------------------------------------------------------------------------------------------------------------------------------------------------------------------------------------------------------------------|--------------------------------------------------------------------------------------------------------------------------------------------------------------------------------------------------------------------------------------------------------------------------|
| Truax Accurate Empathy Scale (AE)                                      | 1961           | Behavioural/Expert Coder | (activity of therapist) (uncertain attention to emotion) (attention to relationship between client's actions and emotion) (uncertain attention to meaning) (verbosity) (use of unusual verbal style) (attention to client's actions) | 23                    |                                                                                                                                                                                                                                                                       |                                                                                                                                                                                                                                                                          |
| Twelve Step Facilitation Adherence Competence Empathy Scale (TSF ACES) | 2012           | Self-Report              | No Subscales                                                                                                                                                                                                                         | 8                     |                                                                                                                                                                                                                                                                       |                                                                                                                                                                                                                                                                          |
| Unconditional Self-Kindness Scale                                      | 2018           | Self-Report              | No Subscales                                                                                                                                                                                                                         | 6                     | "How much are you loving and kind to yourself when you are criticized or rejected by another person"<br>"How much are you patient and tolerant with yourself when you fail and make a mistake"                                                                        | 6-point Likert-type scale ranging from 0 (not at all) to 6 (a great deal)                                                                                                                                                                                                |
| Undergraduate Nursing Palliative Care Knowledge Survey (UNPCKS)        | 2020           | Self-Report              | (Principles of Primary Palliative care) (Pain and Provider Self-Care)                                                                                                                                                                | 27                    | NA                                                                                                                                                                                                                                                                    | a multiple-choice format similar to the ELNEC-KAT (Lange et al., 2009)                                                                                                                                                                                                   |
| Unit Manager Support Scale (UMSS)                                      | 2003           | Peer/Corollary Report    | No Subscales                                                                                                                                                                                                                         | 6                     | "My unit manager recognizes the standards of care I try to deliver"<br>"My unit manager knows me well enough to know when I have concerns about patient care and tries to understand my point of view."                                                               | 5-point Likert-type scale ranging from 1 (Never) to 5 (Always)                                                                                                                                                                                                           |
| Universal Worth Scale (UWS)                                            | 2010           | Self-Report              | (personal value) (noncontingence) (universality)                                                                                                                                                                                     | 12                    | "When I fail at something, I try to remember that everybody fails sometimes too"<br>"When I'm going through a very hard time, I'm really nice to myself"                                                                                                              | 5-point Likert scale from 1 (strongly disagree), 2 (disagree), 3 (neutral), 4 (agree), and 5 (strongly agree)                                                                                                                                                            |
| Verona Coding Definitions of Emotional Sequences (VR-CoDES)            | 2009           | Self-Report              | No Subscales                                                                                                                                                                                                                         | 10                    |                                                                                                                                                                                                                                                                       |                                                                                                                                                                                                                                                                          |
| Vicarious Posttraumatic Growth Inventory (VPTGI)                       | 2023           | Self-Report              | (Negative response) (Changes in world view) (Creating meaning to change self) (Changes in interpersonal relationships) (Engaging in efforts of support and self-care) (Client progress impacting growth)                             | 32                    | "As a result of my work with clients or patients who have experienced trauma, I express more kindness in my relationships."<br>"As a result of my work with clients or patients who have experienced trauma, I am more empathic toward others and their experiences." | 6-point Likert scale of agreement                                                                                                                                                                                                                                        |
| Vicarious Resilience Scale (VRS)                                       | 2015           | Self-Report              | (increased resourcefulness) (changes in life goals) (increased self-awareness) (client inspired hope) (increased recognition of spirituality) (increased consciousness of power) (increased capacity to remain present)              | 27                    | "More compassion for people"<br>"Better at self-care"                                                                                                                                                                                                                 | 6-point response scale: Did not experience this (0), Experienced this to a very small degree (1), Experienced this to a small degree (2), Experienced this to a moderate degree (3), Experienced this to a great degree (4), Experienced this to a very great degree (5) |
| Vicarious Trauma Organizational Readiness Guide (VT-ORG)               | 2013           | Self-Report              | (leadership and mission) (management and supervision) (employee empowerment and work environment) (training and professional development) (staff health and wellness)                                                                | 63                    | "Leadership demonstrates a clear and decisive vision that supports and articulates the mission of the organization"<br>"Leadership models, values, and promotes open and respectful communication among staff"                                                        | Likert-type scale (1 = never, 2 = rarely, 3 = sometimes, 4 = often, 5 = always)                                                                                                                                                                                          |
| Vicarious Trauma Scale (VTS)                                           | 2008           | Self-Report              | No Subscales                                                                                                                                                                                                                         | 8                     | "I find myself distressed by listening to my clients' stories and situations"<br>"Sometimes it is hard to stay positive and optimistic given some of the things I encounter in my work"                                                                               | 5-point Likert scale from 1 (strongly disagree), 2 (disagree), 3 (neutral), 4 (agree), and 5 (strongly agree)                                                                                                                                                            |
| Victim Concern Scale (VCS)                                             | 2006           | Self-Report              | (general concern for victims) (concern for victims of violent crimes) (concern for victims of property crimes/theft) (concern for culpable victims)                                                                                  | 100                   |                                                                                                                                                                                                                                                                       |                                                                                                                                                                                                                                                                          |
| Victim Empathy Response Assessment (VERA)                              | 2008           | Self-Report              | (non-offending focus) (sexual offense focus)                                                                                                                                                                                         | 5                     | "Worried"<br>"Sad"                                                                                                                                                                                                                                                    | five-point Likert scale ranging from 0 (not at all) to 4 (very much so)                                                                                                                                                                                                  |
| Visual CARE Measure                                                    | 2002           | Self-Report              | No Subscales                                                                                                                                                                                                                         | 10                    |                                                                                                                                                                                                                                                                       |                                                                                                                                                                                                                                                                          |
| Visual CARE Measure 10Q                                                | 2012           | Peer/Corollary Report    | No Subscales                                                                                                                                                                                                                         | 10                    | How was the therapist at... "...making you feel happy and relaxed? (being friendly and caring and making you feel calm)"<br>"...asking questions and letting you talk? (being interested in you and giving you time to speak)"                                        | a visual 5-point scale and symbols to support understanding of each questions                                                                                                                                                                                            |
| Visual CARE Measure 10Q Parent                                         | 2012           | Peer/Corollary Report    | No Subscales                                                                                                                                                                                                                         | 10                    |                                                                                                                                                                                                                                                                       | a visual 5-point scale and symbols to support understanding of each questions                                                                                                                                                                                            |

| Instrument                                                 | Published Year | Type of Measure          | Subscales/ Forms                                                                                           | Total Number of Items | Sample Item(s)                                                                                                                                                                                                                 | Response set                                                                                                                                                                                |
|------------------------------------------------------------|----------------|--------------------------|------------------------------------------------------------------------------------------------------------|-----------------------|--------------------------------------------------------------------------------------------------------------------------------------------------------------------------------------------------------------------------------|---------------------------------------------------------------------------------------------------------------------------------------------------------------------------------------------|
| Visual CARE Measure 5Q                                     | 2012           | Peer/Corollary Report    | No Subscales                                                                                               | 5                     | How was the therapist at... "...making you feel happy and relaxed? (being friendly and caring and making you feel calm)"<br>"...asking questions and letting you talk? (being interested in you and giving you time to speak)" | a visual 5-point scale and symbols to support understanding of each questions                                                                                                               |
| Warmth/Affection Coding System (WACS)                      | 2023           | Behavioural/Expert Coder | (Tone/Pitch of Voice) (Vocally Expressed Affection) (Facial Expression) (Physical Touch) (Reciprocal Play) | N/A                   |                                                                                                                                                                                                                                |                                                                                                                                                                                             |
| Working Alliance Inventory - General Practitioner (WAI-GP) | 2021           | Self-Report              | (Goals) (Tasks) (Bond)                                                                                     | 12                    | "I believe my GP cares about me."<br>"I feel that my GP understands me."                                                                                                                                                       | 5-point Likert scale, ranging from 'strongly agree' (1) to 'strongly disagree' (5)                                                                                                          |
| Workplace Compassion Scale                                 | 2023           | Self-Report              | (noticing) (empathizing) (sensemaking) (acting)                                                            | 12                    | "I experience pain from people's distress in my workplace."<br>"When I see someone in distress in my workplace, I try to act as quickly as possible."                                                                          | 7-point response scale from almost never true to almost always true                                                                                                                         |
| Young Children's Empathy Measure (YCEM)                    | 1990           | Self-Report              | (cognitive perspective taking) (affective perspective taking)                                              | 6                     | "A child had just lost its best friend"<br>"A child really wants to go out but is not allowed"                                                                                                                                 | response to the question "How do you feel about this?" from 4 = exact match to the intended emotion; 3 = similar emotion; 2 = some emotion; 1 = nonemotional response; and, 0 = no response |
| Youth Suicide Scale (YSS)                                  | 1980           | Self-Report              | No Subscales                                                                                               | 11                    | "Belief about the psychological disturbance of the child"<br>"How difficult to express sympathy toward the parent"                                                                                                             | 7 point Likert scale                                                                                                                                                                        |

**S3 Table. Measures of compassion and empathy.** S3 Table includes all of the compassion and empathy measures that were identified with subscales and sample items, sorted alphabetically.
